# Supplementary material for: Characterization of the flavoenzyme XiaK as an N-hydroxylase and implications in indolosesquiterpene diversification
Source: PubMed Central journal article supplement — Chem Sci. 2017 May 4;8(7):5067–77. doi: 10.1039/c7sc01182b (PMC5613243; doi:10.1039/c7sc01182b), 2017-05-04
Supplement: SC-008-C7SC01182B-s001.pdf [file SC-008-C7SC01182B-s001.pdf]

## Supplementary Information

### Characterization of the Flavoenzyme XiaK as an *N*-Hydroxylase and Implications in Indolosesquiterpene Diversification†

Qingbo Zhang,<sup>‡a</sup> Huixian Li,<sup>‡ab</sup> Lu Yu,<sup>c</sup> Yu Sun,<sup>d</sup> Yiguang Zhu,<sup>a</sup> Hanning Zhu,<sup>a</sup> Liping Zhang,<sup>a</sup> Shu-Ming Li,<sup>e</sup> Yuemao Shen,<sup>f</sup> Changlin Tian,<sup>c</sup> Ang Li,<sup>d</sup> Hung-wen Liu,<sup>g\*</sup> and Changsheng Zhang<sup>a\*</sup>

<sup>a</sup>CAS Key Laboratory of Tropical Marine Bio-resources and Ecology, RNAM Center for Marine Microbiology, Guangdong Key Laboratory of Marine Materia Medica, South China Sea Institute of Oceanology, Chinese Academy of Sciences, 164 West Xingang Road, Guangzhou 510301, China;

<sup>b</sup>Institute of Marine Natural Products, School of Marine Sciences, Sun Yat-sen University, Guangzhou, 135 West Xingang Road, Guangzhou 510006, China;

<sup>c</sup>Hefei National Laboratory of Microscale Physical Sciences, School of Life Science, University of Science and Technology of China, Hefei, 230027, China, and High Magnetic Field Laboratory, Chinese Academy of Sciences, Hefei, 230031, P. R. China;

<sup>d</sup>State Key Laboratory of Bioorganic and Natural Products Chemistry, Shanghai Institute of Organic Chemistry, Chinese Academy of Sciences, 345 Lingling Road, Shanghai 200032, China;

<sup>e</sup>Institut für Pharmazeutische Biologie und Biotechnologie, Philipps-Universität Marburg, Deutschhausstrasse 17a, 35037 Marburg, Germany;

<sup>f</sup>State Key Laboratory of Microbial Technology, School of Life Science, Shandong University, Jinan 250100, China;

<sup>g</sup>Division of Chemical Biology and Medicinal Chemistry, College of Pharmacy and Department of Chemistry, University of Texas at Austin, Austin, TX, 78712, USA.

‡ Q. Zhang and H. Li contributed equally to this work.

Correspondence and requests for materials should be addressed to C.Z. (email: [czhang2006@gmail.com](mailto:czhang2006@gmail.com)) or H.w.L. ([h.w.liu@mail.utexas.edu](mailto:h.w.liu@mail.utexas.edu))

## Contents

|                                                                                                                                                     |     |
|-----------------------------------------------------------------------------------------------------------------------------------------------------|-----|
| <b>Author contributions</b> .....                                                                                                                   | S3  |
| <b>Table S1</b> Strains, plasmids and primers used and generated in this study .....                                                                | S4  |
| <b>Table S2</b> The <sup>1</sup> H NMR data of compounds <b>13</b> , <b>17–19</b> .....                                                             | S5  |
| <b>Table S3</b> The <sup>13</sup> C NMR data of compounds <b>13</b> , <b>17–19</b> .....                                                            | S6  |
| <b>Table S4</b> Comparison of the kinetic parameters of XiaK and other <i>N</i> -oxidases.....                                                      | S7  |
| <b>Fig. S1</b> SDS-PAGE analysis of purified recombinant XiaK and the determination of FAD as the non-covalent binding cofactor in XiaK. ....       | S8  |
| <b>Fig. S2</b> UV-Vis spectral and LC-MS analysis of XiaK reaction products with XMA ( <b>1</b> ).....                                              | S9  |
| <b>Fig. S3</b> The spectral data of <b>13</b> .....                                                                                                 | S10 |
| <b>Fig. S4</b> The EPR experiment data of XMA ( <b>1</b> ) and OXM ( <b>7</b> ).....                                                                | S17 |
| <b>Fig. S5</b> <sup>15</sup> N-labelling related studies.....                                                                                       | S18 |
| <b>Fig. S6</b> Construction of the in-frame deletion mutant XM47i ( $\Delta xiaP1$ ) .....                                                          | S22 |
| <b>Fig. S7</b> Comparison of theoretical simulation and experimental EPR spectra of <sup>14</sup> N- <b>12</b> and <sup>15</sup> N- <b>12</b> ..... | S23 |
| <b>Fig. S8</b> Estimation of the spin concentration of <b>12</b> .....                                                                              | S23 |
| <b>Fig. S9</b> Phylogenetic analysis of XiaK with other flavoenzymes.....                                                                           | S24 |
| <b>Fig. S10</b> Comparison of well aligned XiaK structure model and the crystal structures of class A flavoprotein monooxygenases.....              | S25 |
| <b>Fig. S11</b> Sequence comparison of XiaK and four class A flavoprotein monooxygenases ..                                                         | S26 |
| <b>Fig. S12</b> UV-Vis and HRESIMS spectra of <b>16</b> .....                                                                                       | S27 |
| <b>Fig. S13</b> Comparison of UV-vis spectra of <b>1</b> , <b>17</b> and <b>18</b> .....                                                            | S28 |
| <b>Fig. S14</b> The spectral data of <b>17</b> .....                                                                                                | S29 |
| <b>Fig. S15</b> The spectral data of <b>18</b> .....                                                                                                | S36 |
| <b>Fig. S16</b> The Spectral data of <b>19</b> .....                                                                                                | S43 |
| <b>Fig. S17</b> Stability of compounds <b>12</b> stored in organic solvents.....                                                                    | S51 |
| <b>Fig. S18</b> The hypothesized mechanism for the formation of DXMs A-C ( <b>8-10</b> ).....                                                       | S52 |
| <b>Supplementary Reference</b> .....                                                                                                                | S53 |

### **Author Contributions**

Q.Z., H.L. and C.Z. conceived and designed the study. Q.Z., Y.S and A.L. performed chemical studies. H.L., Y.Z. and H.Z. performed molecular and biochemical experiments. L.Y. and C.T. performed EPR experiments, L.Z. performed bioinformatics analysis. S.-M.L, Y.-M.S., A.L., H.w.L. and C.Z. analyzed and discussed the results. Q.Z., H.L., L.Y., H.w.L. and C.Z. prepared the manuscript.

**Table S1** Strains, plasmids and primers used and generated in this study.

| <b>Strains/Plasmids</b>        | <b>Characteristic(s)</b>                                                                                                                                            | <b>Sources</b>                                   |
|--------------------------------|---------------------------------------------------------------------------------------------------------------------------------------------------------------------|--------------------------------------------------|
| <b><i>E.coli</i></b>           |                                                                                                                                                                     |                                                  |
| DH5α                           | Host strain for cloning                                                                                                                                             | Invitrogen                                       |
| ET12567                        | Donor strain for conjugation                                                                                                                                        | 1                                                |
| BL21(DE3)                      | Host strain for protein expression                                                                                                                                  | Novagen                                          |
| <b><i>Streptomyces</i> sp.</b> |                                                                                                                                                                     |                                                  |
| <i>S. coelicolor</i> YF11      | Host strain for gene cluster and protein expression                                                                                                                 | 2                                                |
| <i>S. pactum</i> SCSIO 02999   | Wild type, xiamycin/oxiamycin producer                                                                                                                              | 3                                                |
| XM47i                          | <i>XiaP</i> gene in-frame deletion mutant of SCSIO 02999                                                                                                            | This work                                        |
| <b>Plasmids</b>                |                                                                                                                                                                     |                                                  |
| BT340                          | Cm <sup>r</sup> , express FLP-recombinase to form in-frame deletion genes                                                                                           | 4                                                |
| pUZ8002                        | Km <sup>r</sup> , including <i>tra</i> for conjugation                                                                                                              | 5                                                |
| pSET152                        | Ap <sup>r</sup> , integrative vector for <i>Streptomyces</i> heterologous expression                                                                                | 6                                                |
| pPWW50A                        | Ap <sup>r</sup> , <i>amp</i> in pPWW50 was replaced by <i>aac(3)IV</i> and <i>oriT</i>                                                                              | 7                                                |
| pET28a                         | Km <sup>r</sup>                                                                                                                                                     | Novagen                                          |
| pCSG2407                       | cosmid carrying the intact <i>xia</i> gene cluster                                                                                                                  | 3                                                |
| pCSG2517                       | A pCSG2407 derivative where <i>xiaP</i> was disrupted by <i>aac(3)IV</i>                                                                                            | 3                                                |
| pCSG2547                       | A pCSG2517 derivative where <i>xiaP</i> was in-frame deleted                                                                                                        | This work                                        |
| pCSG2562                       | A pCSG2557 derivative where <i>neo</i> was disrupted by <i>aac(3)IV</i>                                                                                             | This work                                        |
| pCSG2671                       | about 30 kb <i>EcoR</i> I fragment containing the <i>xia</i> gene cluster from pCSG2407 inserted into pSET152 digested with <i>EcoRI</i>                            | This work                                        |
| pCSG2607                       | 1.8 kb <i>xiaK</i> PCR fragment ( <i>NdeI/BglII</i> ) from SCSIO 02999 inserted into pET28a for <i>E.coli</i> expression inserted into pET28a ( <i>NdeI/BamHI</i> ) | This work                                        |
| pCSG2701                       | 1.8 kb <i>xiaK</i> PCR fragment ( <i>NdeI/BglII</i> ) from SCSIO 02999 inserted into pPWW50A( <i>NdeI/BamHI</i> )                                                   | This work                                        |
| <b>Primers</b>                 | <b>Target gene</b>                                                                                                                                                  | <b>Sequence</b>                                  |
| For diagnostic PCR             |                                                                                                                                                                     |                                                  |
| XiaP-1F                        | <i>xiaP</i>                                                                                                                                                         | 5'- GCGAACTGGCAGCGATTGTG -3'                     |
| XiaP-1R                        |                                                                                                                                                                     | 5'- GCGGATCTGGTAGGCGATGC -3'                     |
| orf1-1F                        | <i>orf1</i>                                                                                                                                                         | 5'- GTACTGCGTGAAGCCCGACC -3'                     |
| orf1-1R                        |                                                                                                                                                                     | 5'- CCCAGAACTCGGCGGTGTAC -3'                     |
| For gene cloning               |                                                                                                                                                                     |                                                  |
| XiaK-3F                        | <i>xiaK</i>                                                                                                                                                         | 5'-GGAAGACATATGTTGGACGTAGAAGTGCC-3', <i>NdeI</i> |
| XiaK-3R                        |                                                                                                                                                                     | 5'- CAACATAGATCTCAGGAAGGTGTGG -3', <i>BglII</i>  |

**Table S2** The <sup>1</sup>H NMR data of compounds **13**, **17–19**.

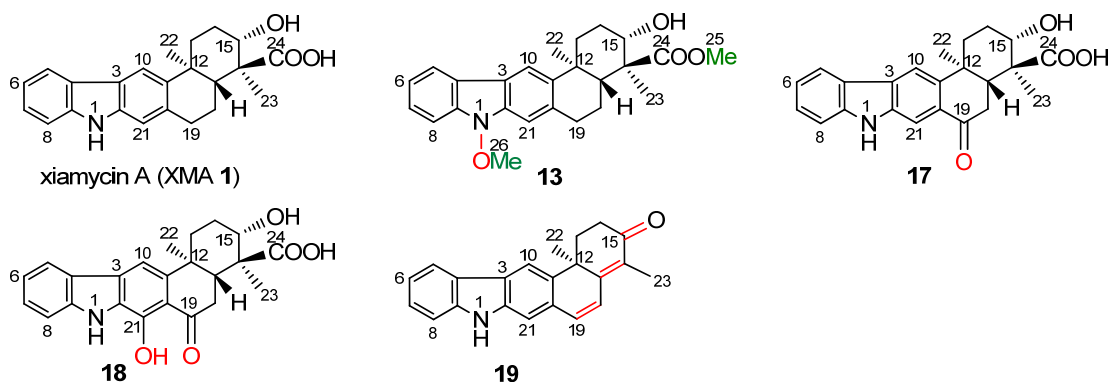

| No.   | <b>1</b> <sup>a</sup>                      | <b>13</b> <sup>b</sup>                     | <b>17</b> <sup>c</sup>                     | <b>18</b> <sup>c</sup>                      | <b>19</b> <sup>c</sup>                     |
|-------|--------------------------------------------|--------------------------------------------|--------------------------------------------|---------------------------------------------|--------------------------------------------|
|       | $\delta_{\text{H}}$ (mult, <i>J</i> in Hz)  | $\delta_{\text{H}}$ (mult, <i>J</i> in Hz) |
| NH    | 10.9 (s) <sup>c</sup>                      |                                            |                                            |                                             |                                            |
| 5     | 7.98 (d, 8.0)                              | 8.09 (d, 8.0)                              | 8.16 (d, 8.0)                              | 8.07 (d, 7.8)                               | 8.07 (d, 7.8)                              |
| 6     | 7.10 (ddd, 8.0, 7.0, 1.0)                  | 7.20 (ddd, 8.0, 7.0, 1.0)                  | 7.20 (m)                                   | 7.18 (dd, 7.8, 7.2)                         | 7.15 (ddd, 8.4, 7.2, 1.2)                  |
| 7     | 7.30 (ddd, 8.0, 7.0, 1.0)                  | 7.40 (ddd, 8.0, 7.0, 1.0)                  | 7.47 (m)                                   | 7.44 (dd, 7.8, 7.2)                         | 7.36 (ddd, 8.4, 7.2, 1.2)                  |
| 8     | 7.36 (d, 8.0)                              | 7.49 (d, 8.0)                              | 7.47 (m)                                   | 7.50 (d, 8.4)                               | 7.43 (d, 7.8)                              |
| 10    | 7.93 (s)                                   | 8.05 (s)                                   | 8.12 (s)                                   | 7.55 (s)                                    | 8.16 (s)                                   |
| 13    | 2.60 (td, 13.0, 3.0);<br>1.79 (m)          | 2.54 (m);<br>1.59 (m)                      | 2.73 (m);<br>1.94 (m)                      | 2.62 (m);<br>1.93 (m)                       | 2.98 (m);<br>2.35 (m)                      |
| 14    | 1.90 (m)                                   | 1.75 (m)                                   | 1.96 (m)                                   | 1.93 (m)                                    | 2.85 (m); 2.67 (m)                         |
| 15    | 4.11 (dd, 9.0, 7.5)                        | 3.88 (m)                                   | 4.13 (m)                                   | 4.10 (m)                                    |                                            |
| 15-OH | 4.71 (m)                                   | 4.80 (d, 5.0)                              |                                            |                                             |                                            |
| 17    | 2.21 (dd, 12.5, 2.0)                       | 1.99 (m)                                   | 2.67 (m)                                   | 2.58 (m)                                    |                                            |
| 18    | 2.00 (m);<br>1.56 (m)                      | 1.93 (m);<br>1.26 (m)                      | 2.96 (m);<br>2.43 (d, 17.5)                | 3.01 (dd, 12, 14.5);<br>2.39 (dd, 12, 14.5) | 6.76 (d, 9.6)                              |
| 19    | 3.09 (m)                                   | 3.09 (m); 2.96 (m)                         |                                            |                                             | 7.05 (d, 9.6)                              |
| 21    | 7.07 (s)                                   | 7.17 (s)                                   | 8.06 (s)                                   |                                             | 7.35 (s)                                   |
| 22    | 1.30 (s)                                   | 1.21 (s)                                   | 1.39 (s)                                   | 1.32 (s)                                    | 1.49 (s)                                   |
| 23    | 1.26 (s)                                   | 1.14 (s)                                   | 1.33 (s)                                   | 1.30 (s)                                    | 1.92 (s)                                   |
| 24-OH | 12.1 (s) <sup>c</sup>                      |                                            |                                            |                                             |                                            |
| 25    |                                            | 3.62 (s)                                   |                                            |                                             |                                            |
| 26    |                                            | 4.04 (s)                                   |                                            |                                             |                                            |

<sup>a</sup> 500 MHz for <sup>1</sup>H NMR CD<sub>3</sub>OD, tetramethylsilane (TMS) as an internal standard;

<sup>b</sup> 500MHz for <sup>1</sup>H NMR and DMSO-*d*<sub>6</sub>, TMS as an internal standard;

<sup>c</sup> 600 MHz for <sup>1</sup>H NMR CD<sub>3</sub>OD, TMS as an internal standard.

**Table S3** The  $^{13}\text{C}$  NMR data of compounds **13**, **17–19**.



| No. | <b>1</b> <sup>a</sup> | <b>13</b> <sup>b</sup> | <b>17</b> <sup>c</sup> | <b>18</b> <sup>c</sup> | <b>19</b> <sup>c</sup> |
|-----|-----------------------|------------------------|------------------------|------------------------|------------------------|
| 2   | 138.1 C               | 136.2 C                | 139.6 C                | 128.1 C                | 139.5 C                |
| 3   | 121.1 C               | 118.2 C                | 129.5 C                | 130.8 C                | 125.8 C                |
| 4   | 122.6 C               | 119.9 C                | 123.8 C                | 124.2 C                | 124.4 C                |
| 5   | 118.7 CH              | 120.4 CH               | 122.2 CH               | 122.2 CH               | 121.2 CH               |
| 6   | 117.5 CH              | 120.0 CH               | 120.3 CH               | 120.5 CH               | 120.2 CH               |
| 7   | 124.2 CH              | 125.9 CH               | 128.6 CH               | 128.6 CH               | 127.2 CH               |
| 8   | 109.7 CH              | 108.5 CH               | 112.2 CH               | 112.8 CH               | 112.0 CH               |
| 9   | 140.0 C               | 138.0 C                | 143.9 C                | 143.3 C                | 142.6 C                |
| 10  | 114.5 CH              | 116.4 CH               | 116.1 CH               | 106.7 CH               | 116.7 CH               |
| 11  | 139.9 C               | 142.2 C                | 147.5 C                | 147.4 C                | 138.0 C                |
| 12  | 36.4 C                | 36.8 C                 | 38.2 C                 | 38.7 C                 | 40.7 C                 |
| 13  | 37.0 CH <sub>2</sub>  | 37.2 CH <sub>2</sub>   | 38.2 CH <sub>2</sub>   | 38.2 CH <sub>2</sub>   | 35.0 CH <sub>2</sub>   |
| 14  | 26.6 CH <sub>2</sub>  | 27.4 CH <sub>2</sub>   | 28.3 CH <sub>2</sub>   | 28.3 CH <sub>2</sub>   | 35.2 CH <sub>2</sub>   |
| 15  | 74.4 CH               | 73.9 CH                | 76.8 CH                | 76.2 CH                | 200.7 C                |
| 16  | 53.0 C                | 53.5 C                 | 54.3 C                 | 54.3 C                 | 129.4 C                |
| 17  | 45.7 CH               | 46.0 CH                | 46.8 CH                | 46.6 CH                | 160.2 C                |
| 18  | 20.7 CH <sub>2</sub>  | 20.8 CH                | 38.7 CH <sub>2</sub>   | 38.6 CH <sub>2</sub>   | 123.6 CH               |
| 19  | 30.1 CH <sub>2</sub>  | 30.2 CH <sub>2</sub>   | 201.3 C                | 206.9 C                | 136.7 CH               |
| 20  | 132.3 C               | 133.7 C                | 130.2 C                | 112.4 C                | 130.3 C                |
| 21  | 109.1 CH              | 107.7 CH               | 110.7 CH               | 152.2 C                | 112.0 CH               |
| 22  | 24.7 CH <sub>3</sub>  | 25.4 CH <sub>3</sub>   | 24.8 CH <sub>3</sub>   | 24.9 CH <sub>3</sub>   | 31.4 CH <sub>3</sub>   |
| 23  | 9.7 CH <sub>3</sub>   | 10.9 CH <sub>3</sub>   | 11.21 CH <sub>3</sub>  | 11.5 CH <sub>3</sub>   | 10.7 CH <sub>3</sub>   |
| 24  | 180 C                 | 177.3 C                | 180 C                  | 181.3 C                |                        |
| 25  |                       | 51.8 CH <sub>3</sub>   |                        |                        |                        |
| 26  |                       | 63.4 CH <sub>3</sub>   |                        |                        |                        |

<sup>a</sup> 125 MHz for  $^{13}\text{C}$  NMR, CD<sub>3</sub>OD, tetramethylsilane (TMS) as an internal standard;

<sup>b</sup> 150 MHz for  $^{13}\text{C}$  NMR, DMSO-*d*<sub>6</sub> and TMS as an internal standard;

<sup>c</sup> 150 MHz  $^{13}\text{C}$  NMR, CD<sub>3</sub>OD and TMS as an internal standard.

**Table S4** Comparison of the kinetic parameters of XiaK and other *N*-oxidases.

| Enzyme               | Substrate                                                                           | $K_m$ [ $\mu\text{M}$ ] | $k_{cat}$ [ $\text{min}^{-1}$ ] | $k_{cat}/K_m$ [ $\mu\text{M}^{-1} \text{min}^{-1}$ ] |
|----------------------|-------------------------------------------------------------------------------------|-------------------------|---------------------------------|------------------------------------------------------|
| XiaK                 | 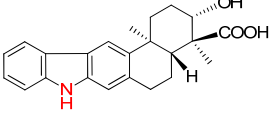   | $16.2 \pm 3.3$          | $260.4 \pm 14.1$                | 16.1                                                 |
| PvdA <sup>8</sup>    |    | $600 \pm 70$            | $24 \pm 3$                      | 0.04                                                 |
| SidA <sup>9</sup>    |    | $490 \pm 70$            | $102 \pm 6$                     | 0.21                                                 |
| NbtG <sup>10</sup>   |    | $350 \pm 50$            | $18.6 \pm 1.2$                  | 0.053                                                |
| CreE <sup>11</sup>   |    | $124.8 \pm 5.0$         | $68.4 \pm 0.5$                  | 0.55                                                 |
| FzmM <sup>12</sup>   |  | $790 \pm 70$            | $148.8 \pm 0.4$                 | 0.19                                                 |
| PrnD <sup>13</sup>   |  | $379 \pm 34$            | $6.5 \pm 0.62$                  | 0.017                                                |
| CalE10 <sup>14</sup> |  | $7.6 \pm 1.2$           | $0.04 \pm 0.01$                 | 0.0053                                               |
| AurF <sup>15</sup>   |  | $5.24 \pm 0.64$         | $6.21 \pm 0.52$                 | 1.21                                                 |

Note: PvdA, SidA, NbtG, CreE and FzmM are flavoenzymes, while PrnD, CalE10 and AurF are P450 enzymes. Shown in the table (except XiaK) are the kinetic parameters for an *N*-hydroxylation reaction to convert a primary amine to a hydroxylamine.

**Fig. S1** SDS-PAGE analysis of purified recombinant XiaK and the determination of FAD as the non-covalent binding cofactor in XiaK.

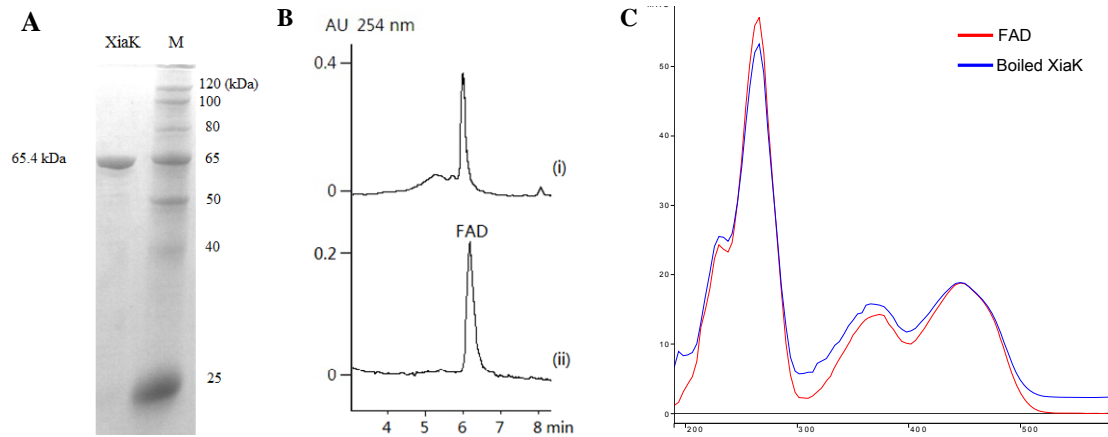

(A) SDS-PAGE analysis of XiaK. The expected size of N-His<sub>6</sub>-tagged XiaK (65.4 kDa) was indicated. Lane M, protein molecular weight standards (ProteinRuler™ III, TransGen Biotech). (B) HPLC analysis of boiled XiaK. (i) boiled XiaK; (ii) FAD standard. (C) Comparison of UV-Vis spectra of the supernatants of boiled XiaK and the FAD standard.



**Fig. S2** UV-Vis spectral and LC-MS analysis of XiaK reaction products with XMA (**1**).

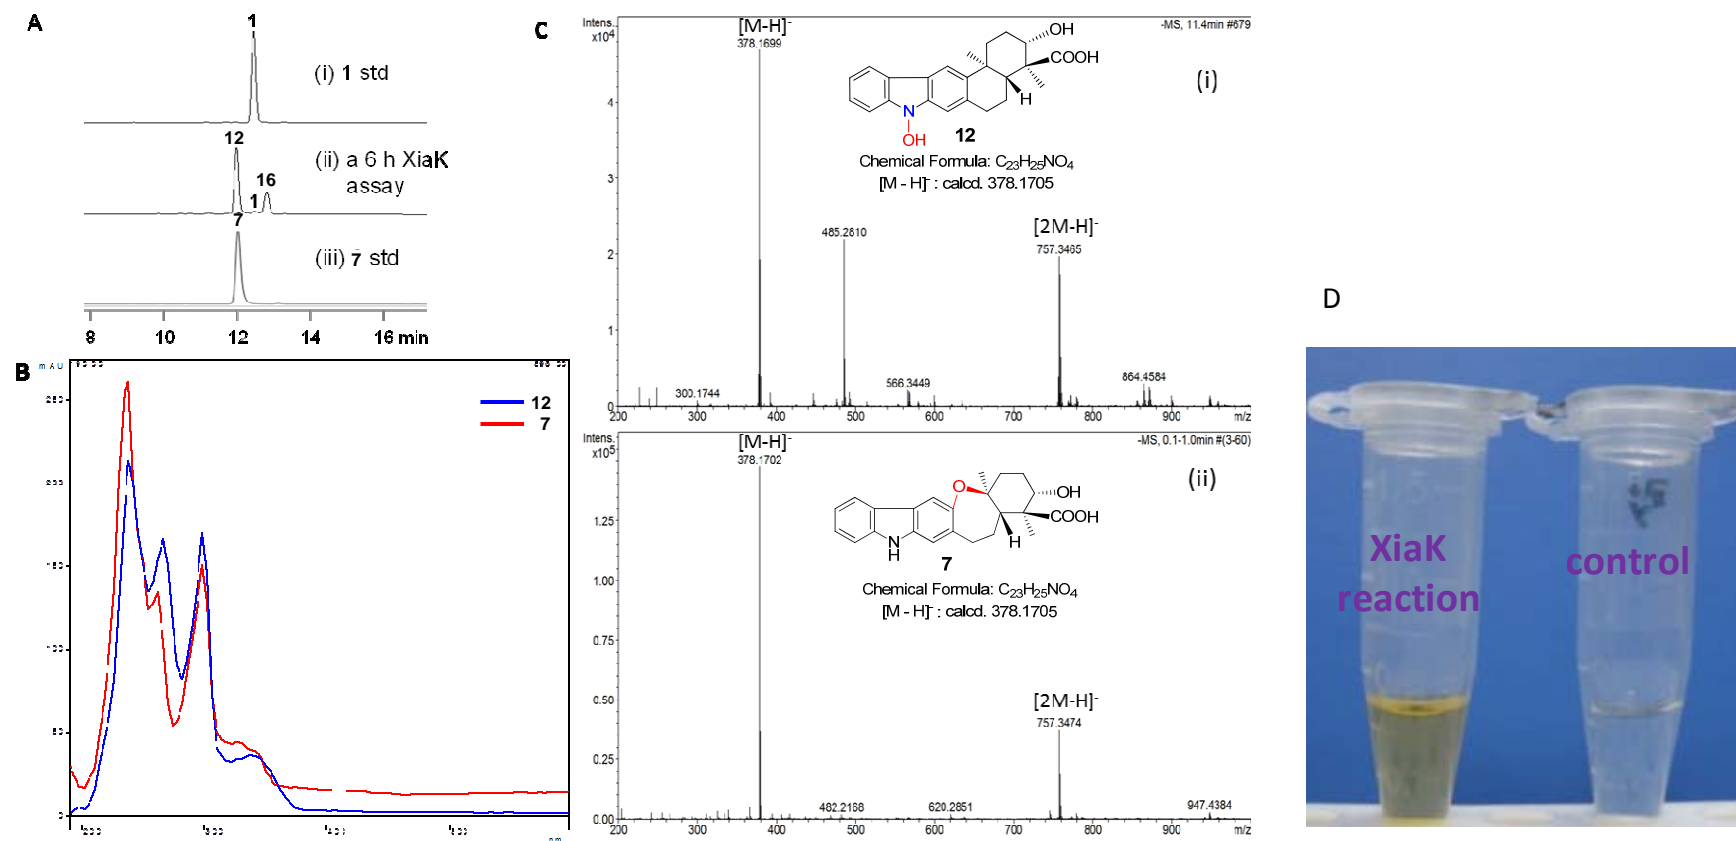

(A) HPLC analysis of XiaK-catalyzed reaction. (i) XMA (**1**) standard; (ii) a XiaK assay comprising of 300  $\mu$ M XMA (**1**), 1 mM NADPH, and 5  $\mu$ M XiaK in 50 mM  $Na_2HPO_4$ - $NaH_2PO_4$  buffer (pH 8.0) for 6 h at 30  $^{\circ}C$ ; (iii) OXM (**7**) standard. (B) The UV-vis spectral comparison of NOXM (**12**) and OXM (**7**). (C): LC-HRESIMS spectra of **12** (i) and **7** (ii); (D) The yellow color of a typical XiaK reaction with **1** for 2 h versus a control lacking XiaK.

**Fig. S3** The spectral data of **13**. ( 500 MHz for  $^1\text{H}$  NMR, 125 MHz for  $^{13}\text{C}$  NMR,  $\text{DMSO-}d_6$  )

**(A)** The HRESIMS spectrum of **13**

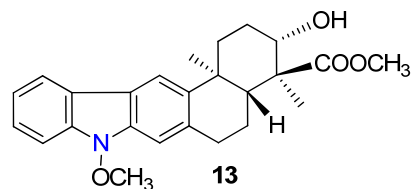

Chemical Formula:  $\text{C}_{25}\text{H}_{29}\text{NO}_4$

$[\text{M} + \text{Na}]^+$ : Calcd. 430.1989

$[\text{M} + \text{K}]^+$ : Calcd. 446.1733

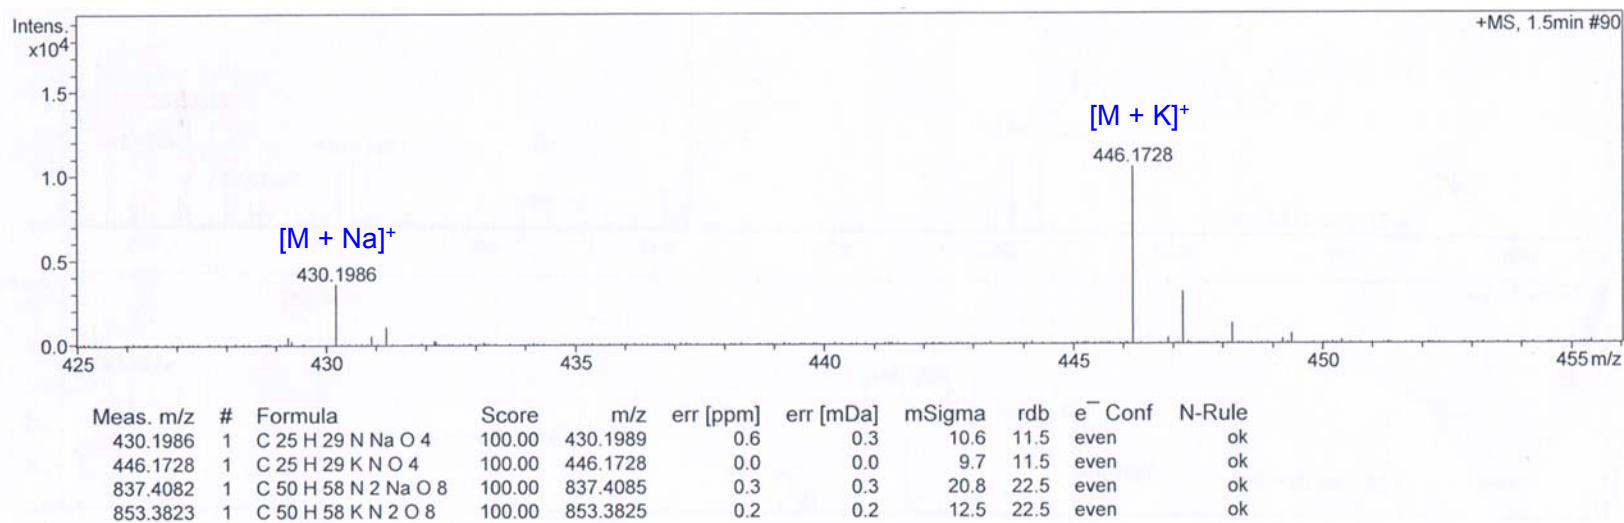

**Fig. S3** The spectral data of **13**. ( 500 MHz for  $^1\text{H}$  NMR, 125 MHz for  $^{13}\text{C}$  NMR,  $\text{DMSO-}d_6$  )

**(B)** The  $^1\text{H}$ -NMR spectrum of **13**

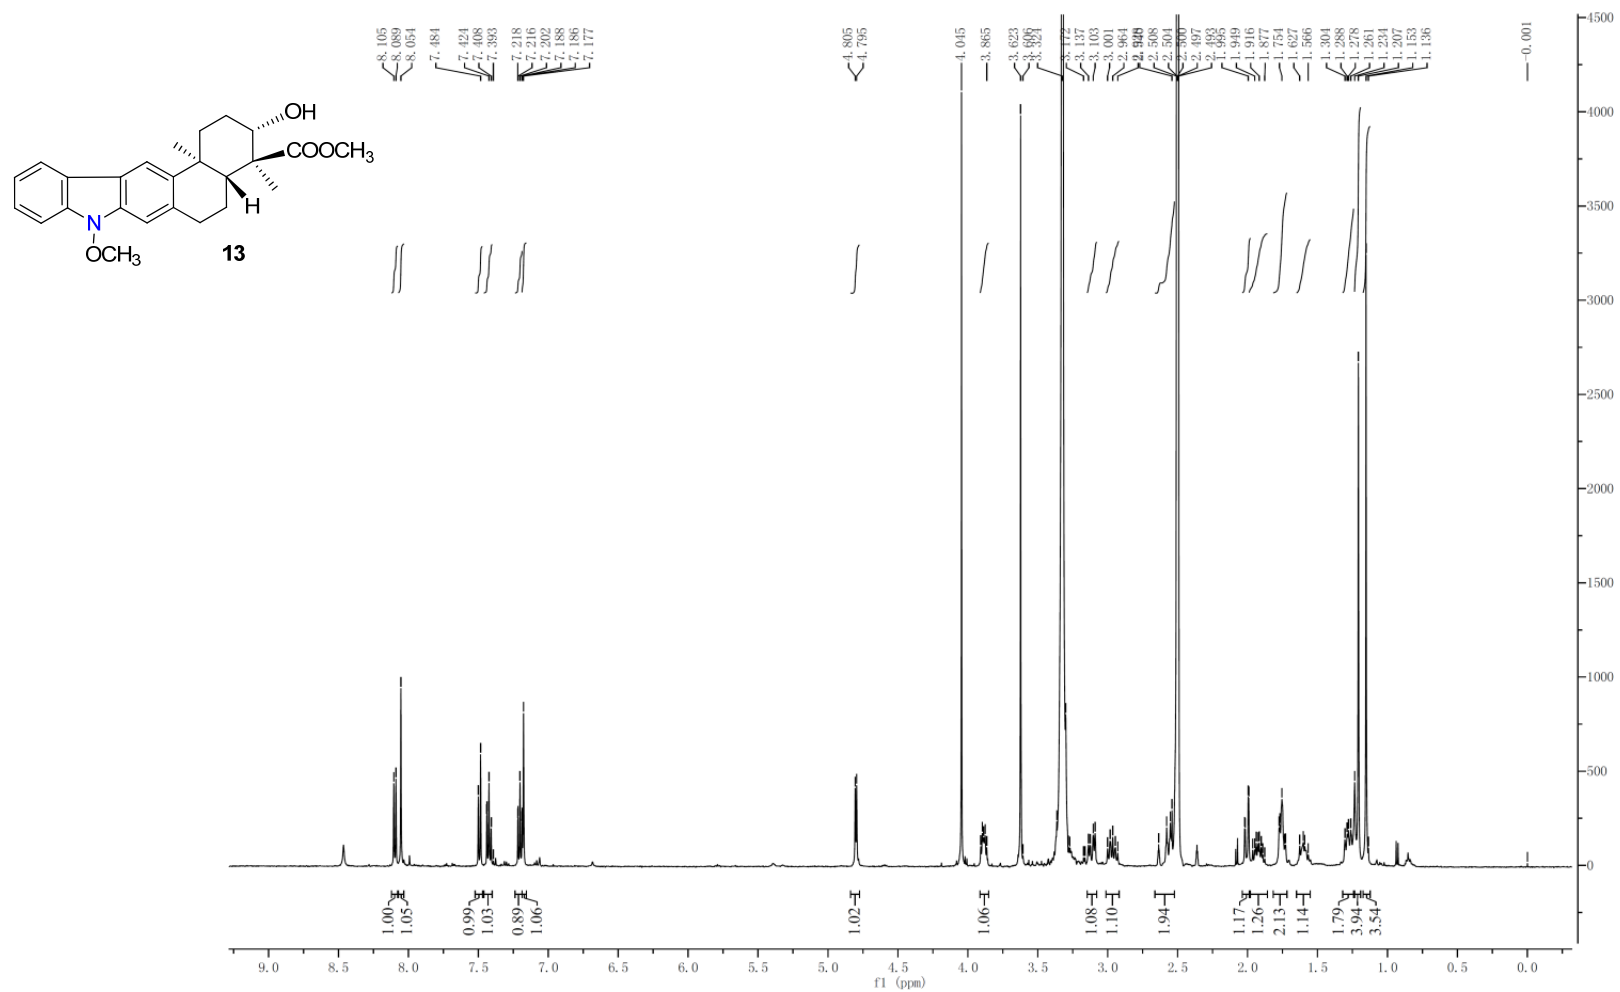

**Fig. S3** The spectral data of **13**. ( 500 MHz for  $^1\text{H}$  NMR, 125 MHz for  $^{13}\text{C}$  NMR,  $\text{DMSO-}d_6$  )

**(C)** The  $^{13}\text{C}$ -NMR spectrum of **13**

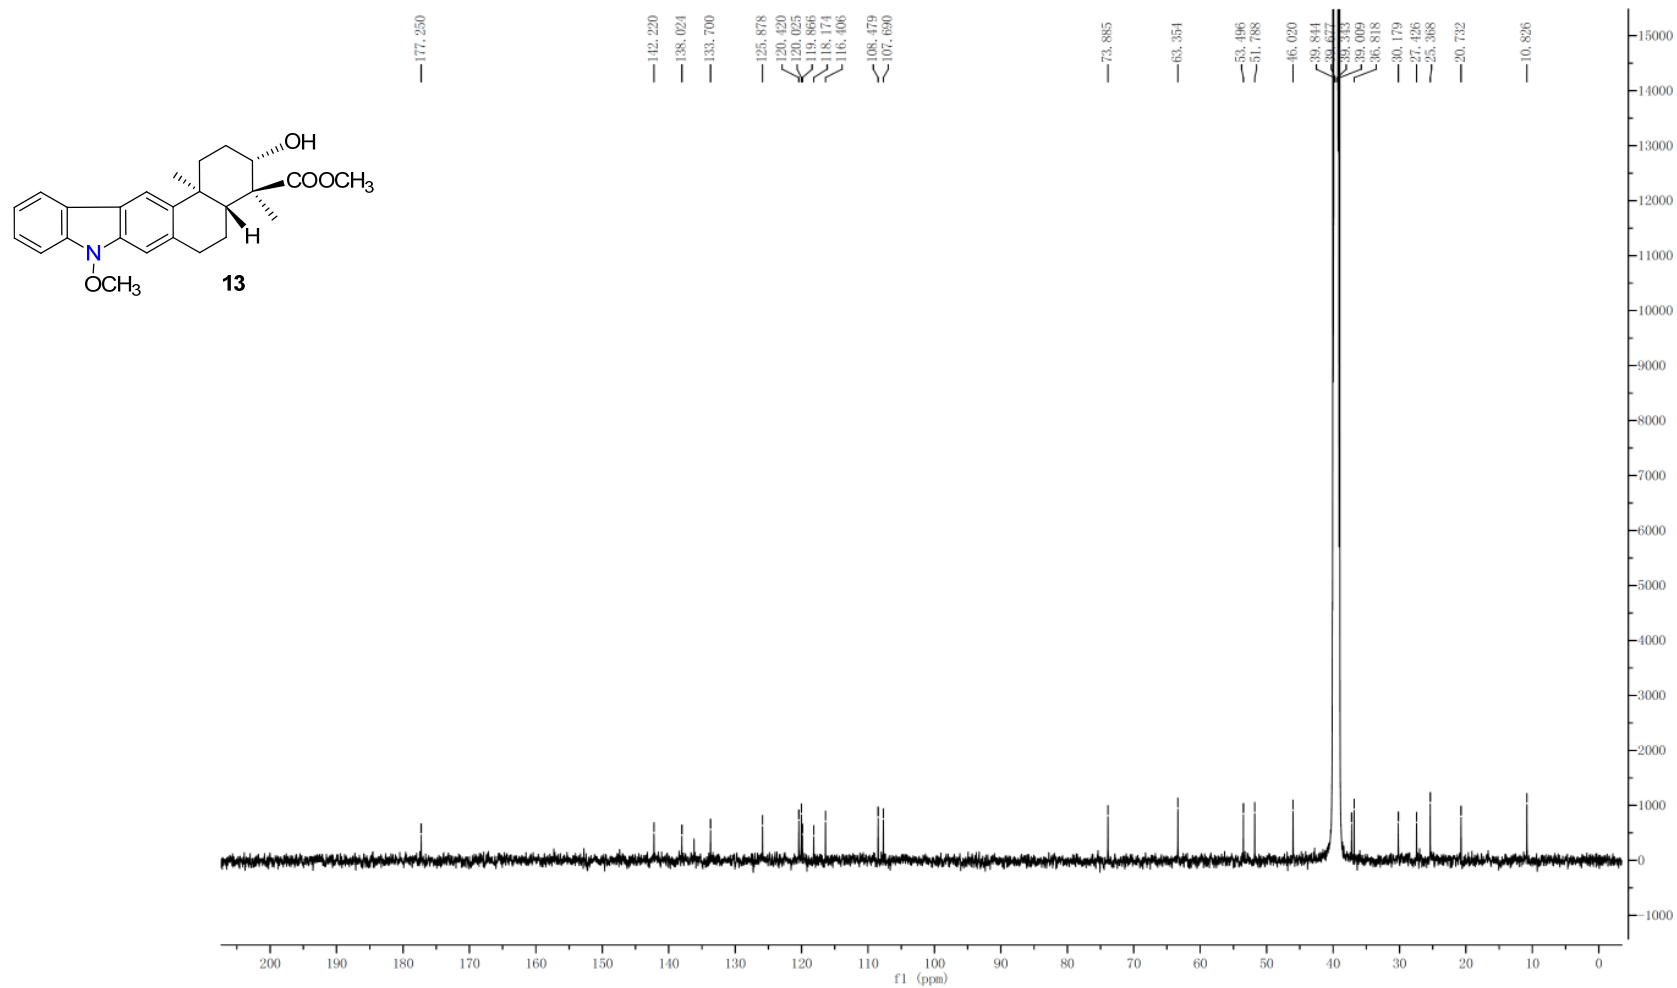

**Fig. S3** The spectral data of **13**. ( 500 MHz for  $^1\text{H}$  NMR, 125 MHz for  $^{13}\text{C}$  NMR,  $\text{DMSO-}d_6$  )

**(D)** The DEPT135 spectrum of **13**

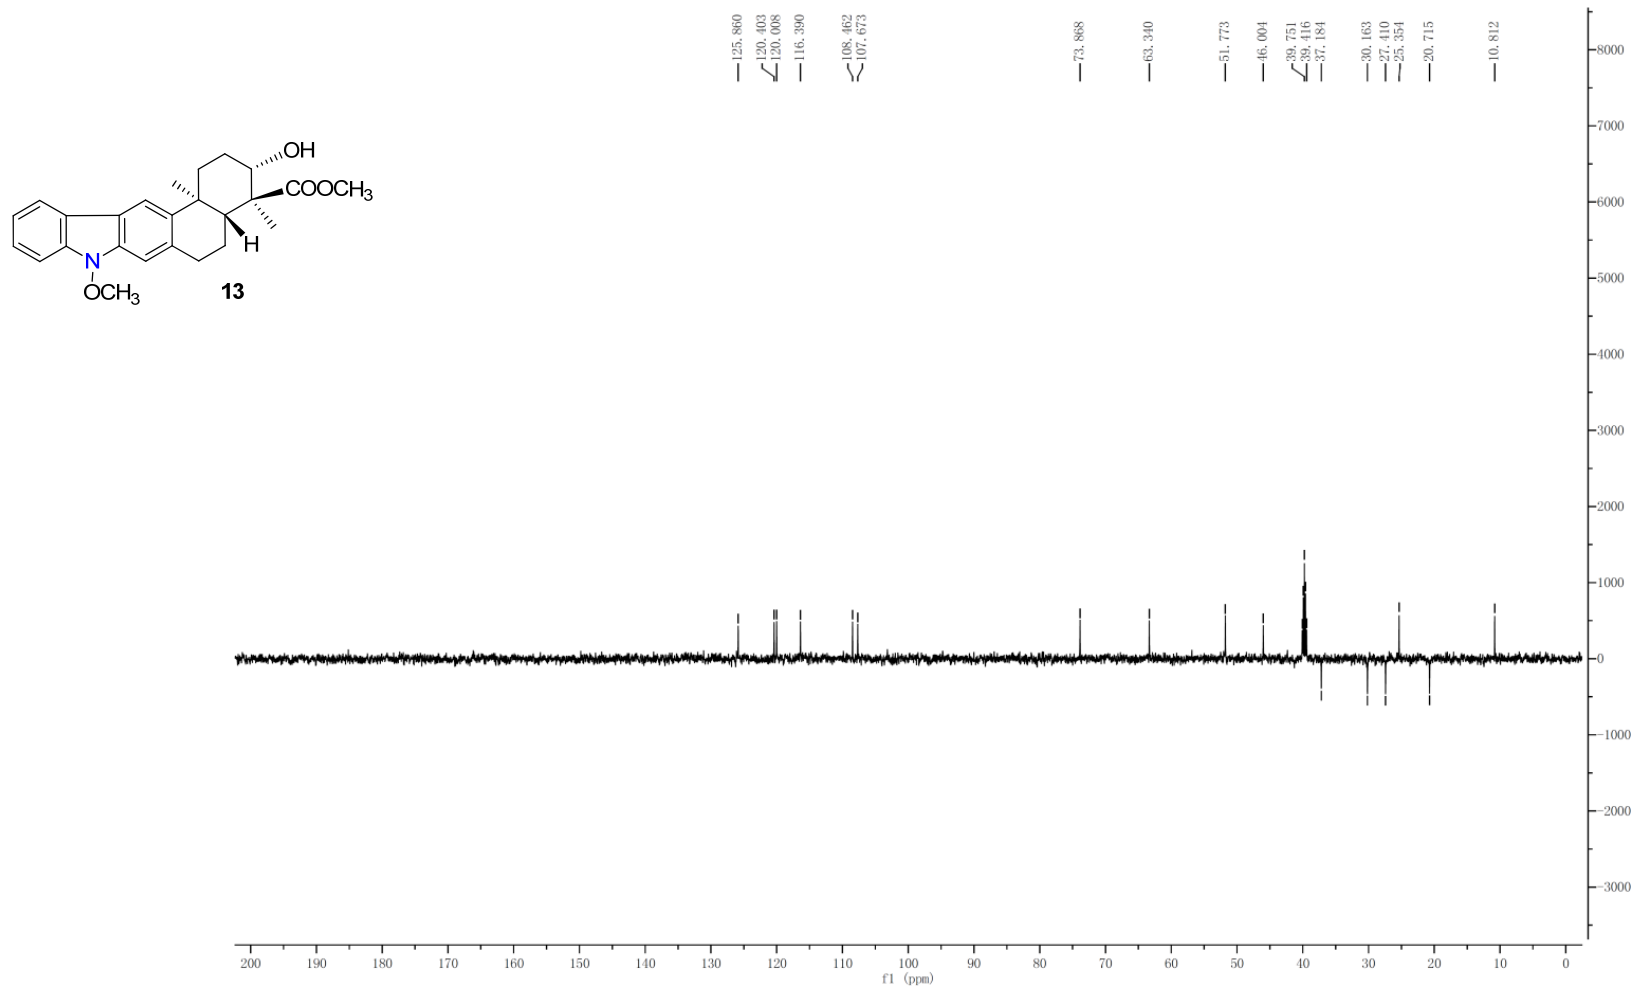

**Fig. S3** The spectral data of **13**. ( 500 MHz for  $^1\text{H}$  NMR, 125 MHz for  $^{13}\text{C}$  NMR,  $\text{DMSO-}d_6$  )

**(E)** The HSQC spectrum of **13**

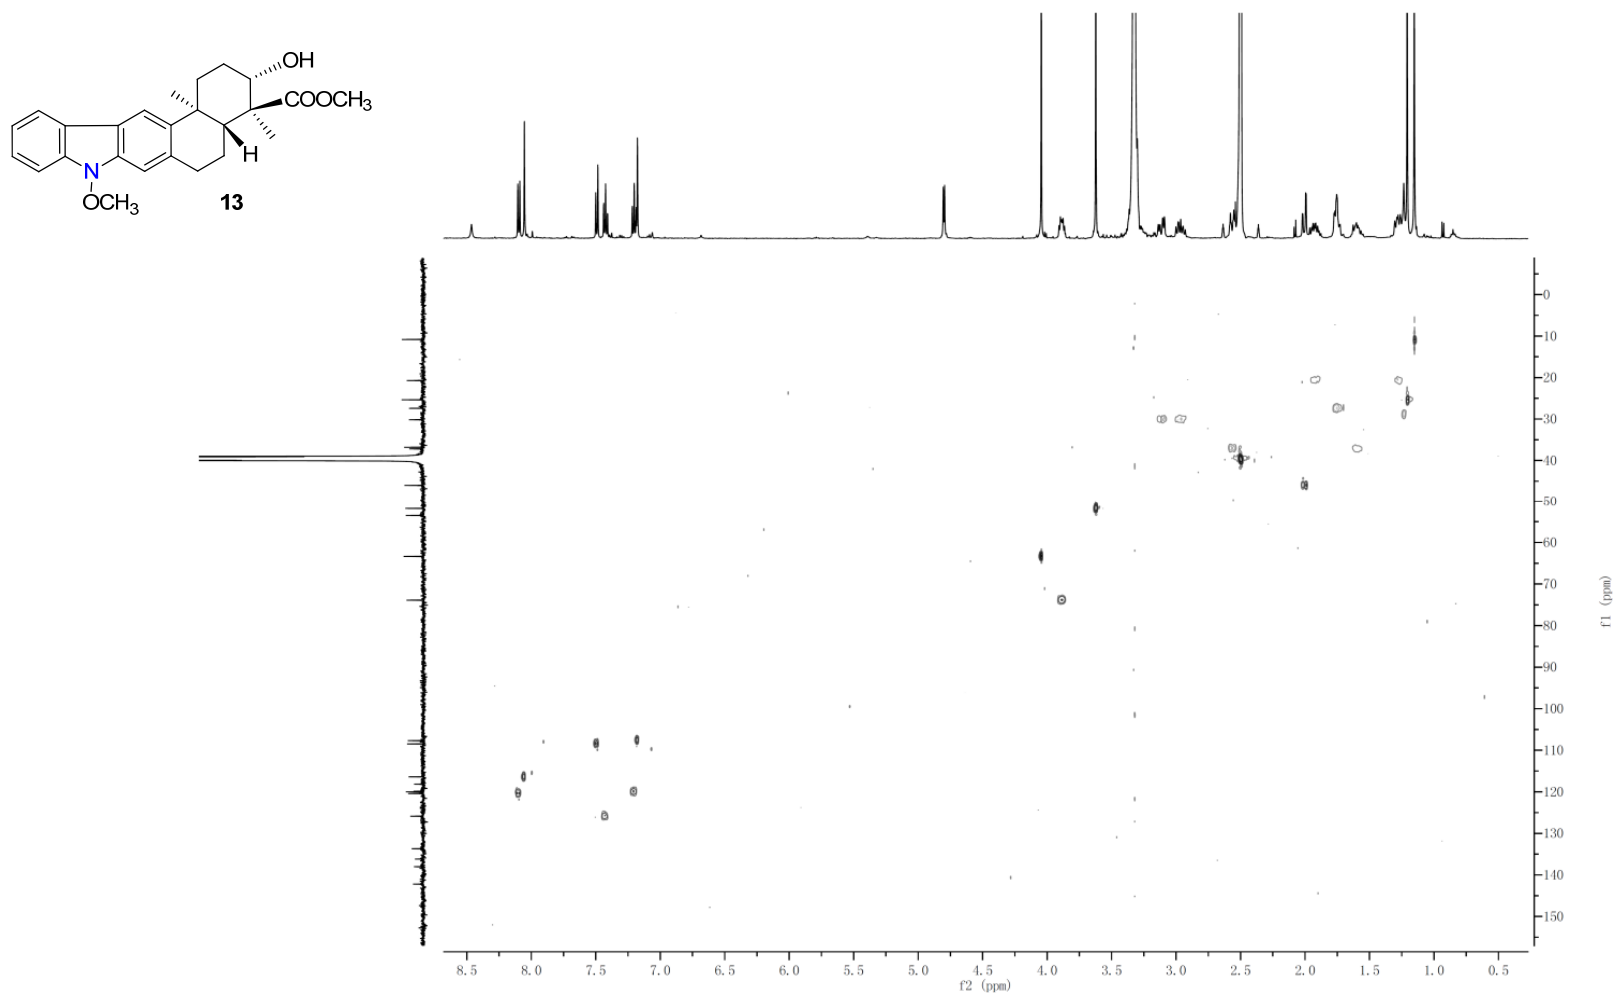

**Fig. S3** The spectral data of **13**. ( 500 MHz for  $^1\text{H}$  NMR, 125 MHz for  $^{13}\text{C}$  NMR,  $\text{DMSO-}d_6$  )

**(F)** The  $^1\text{H}$ - $^1\text{H}$  COSY spectrum of **13**

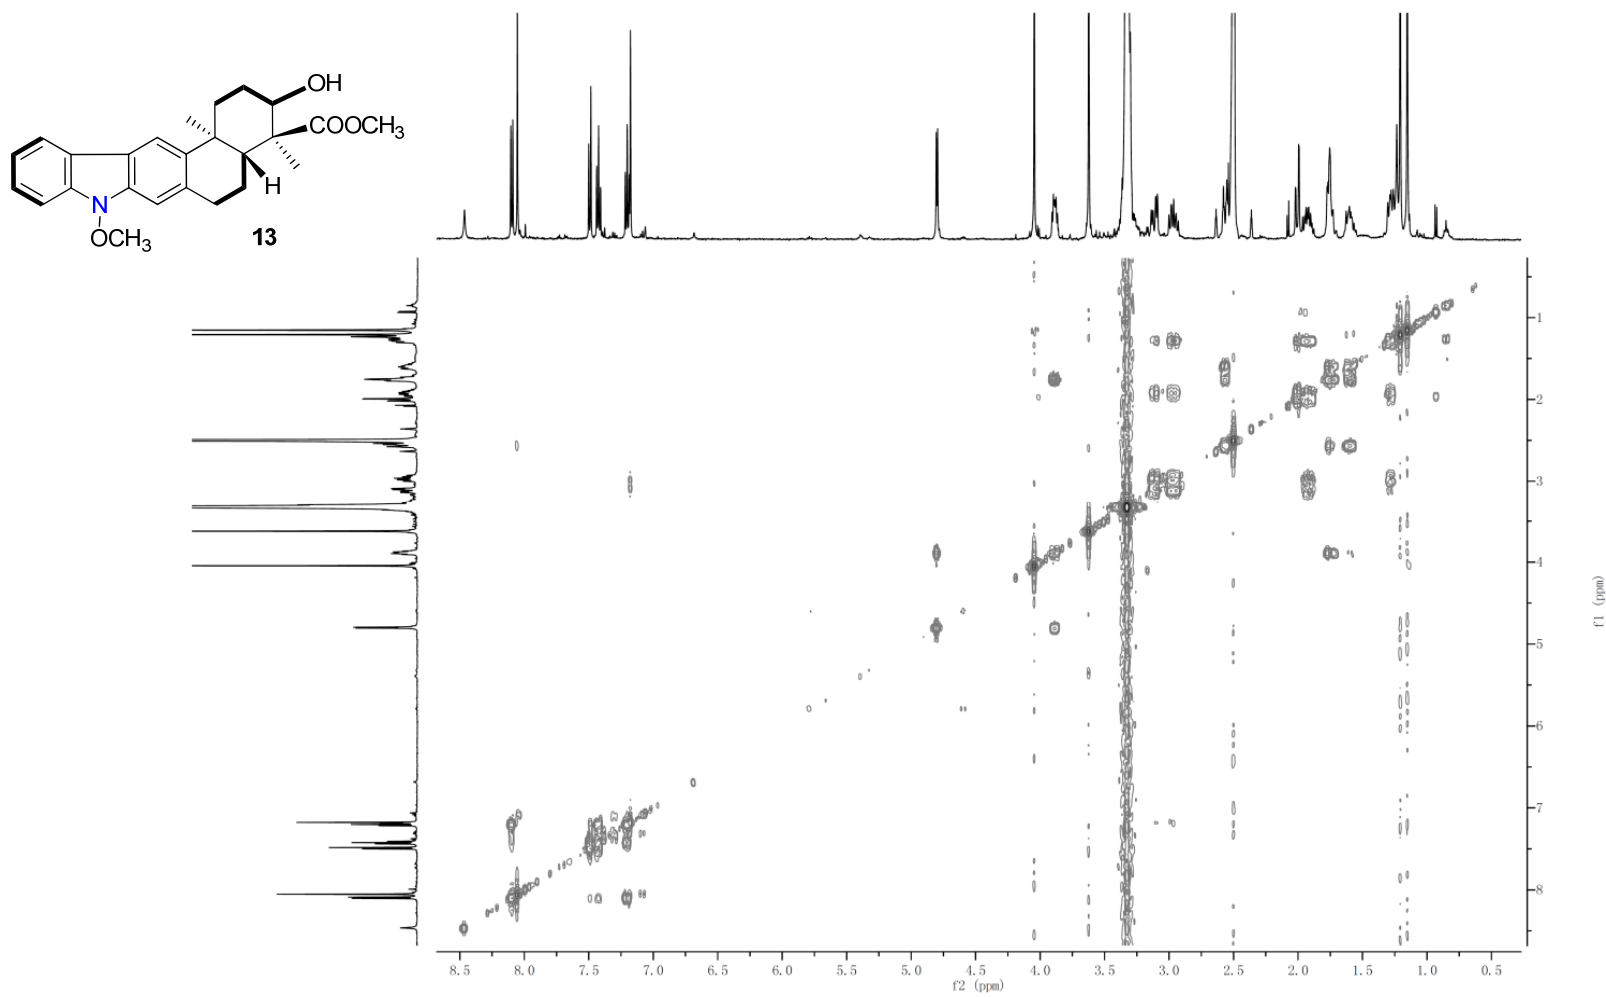

**Fig. S3** The spectral data of **13**. (500 MHz for  $^1\text{H}$  NMR, 125 MHz for  $^{13}\text{C}$  NMR,  $\text{DMSO-}d_6$ )

**(G)** The HMBC spectrum of **13**

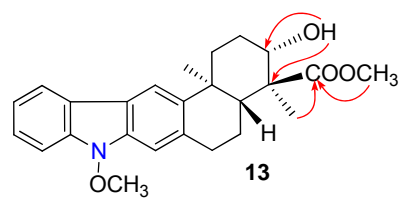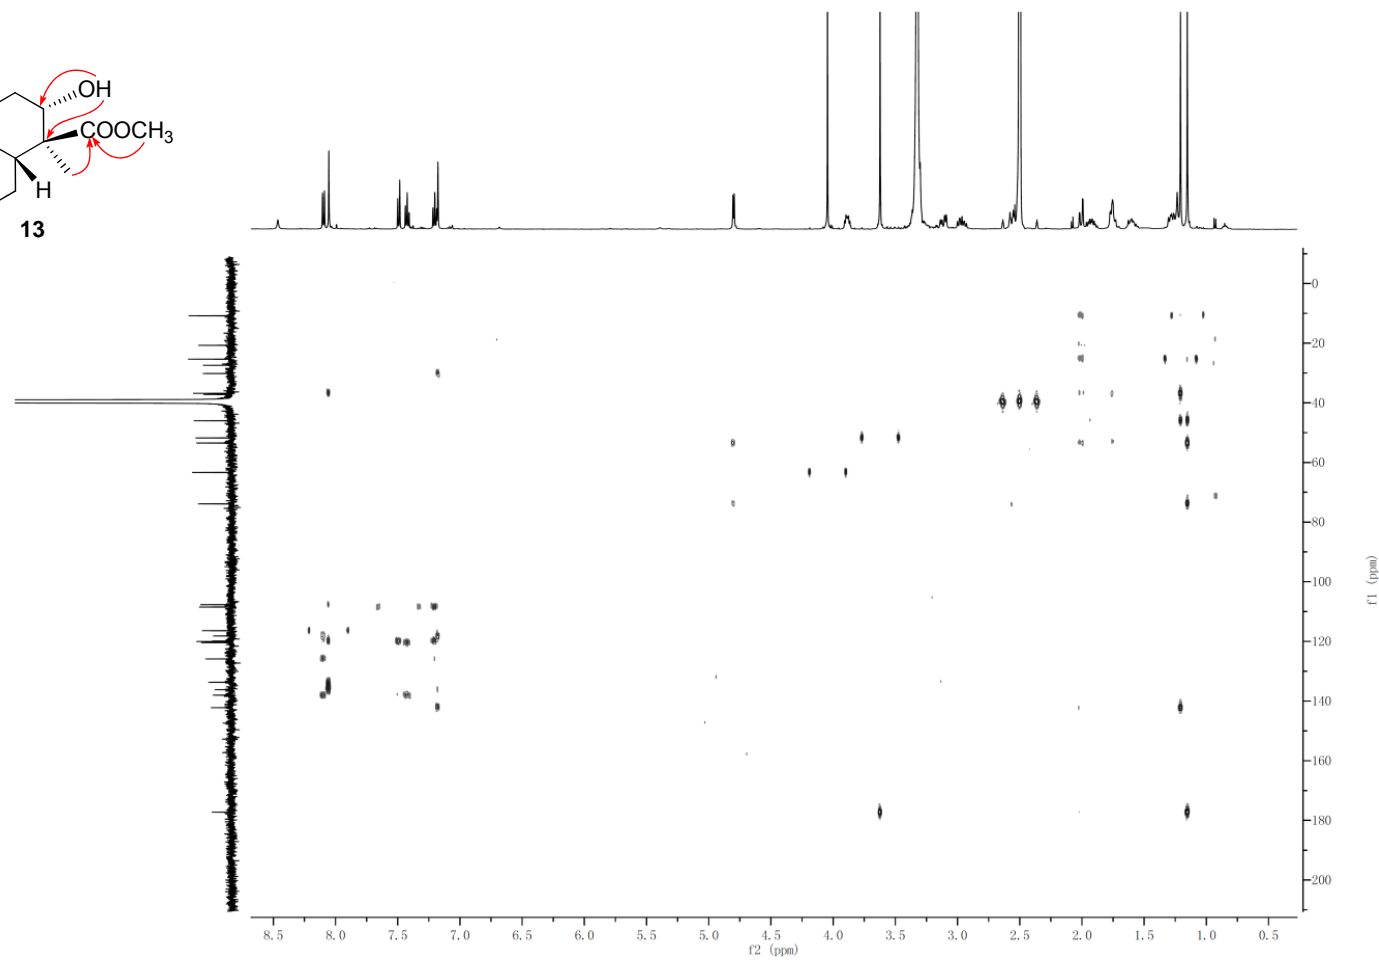



**Fig. S4** The EPR spectra of XMA (1) and OXM (7)

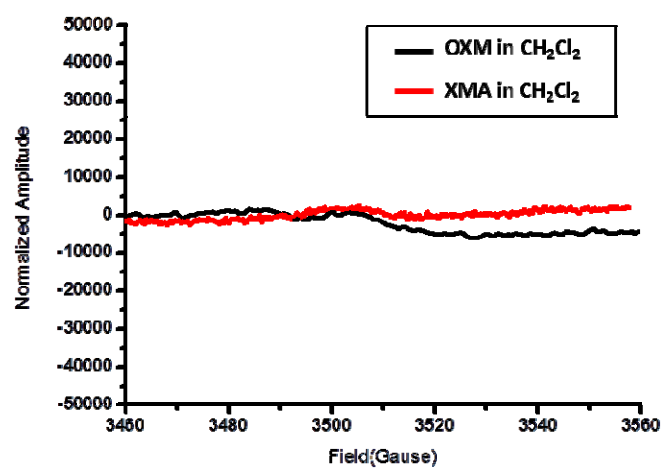

The EPR data acquisition parameters for free radical analysis were as follows: Frequency, 9.390 GHz; Microwave power, 1 mW; Modulation Frequency, 100 kHz; Modulation Amplitude, 0.5 Gauss; Sweep Time, 40 s/scan; Different number of scans were accumulated for each sample until a reasonable S/N ratio was achieved.

**Fig. S5**  $^{15}\text{N}$ -labelling related studies.

**(A)** HRESIMS spectrum of chemically synthesized  $^{15}\text{N}$ -labeled **2**.

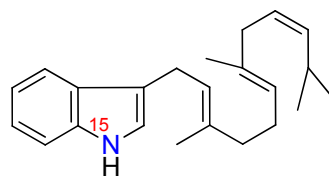

$^{15}\text{N}$ -**2**

Chemical Formula:  $\text{C}_{23}\text{H}_{31}^{15}\text{N}$

$[\text{M} + \text{H}]^+$ : Calcd. 323.2505

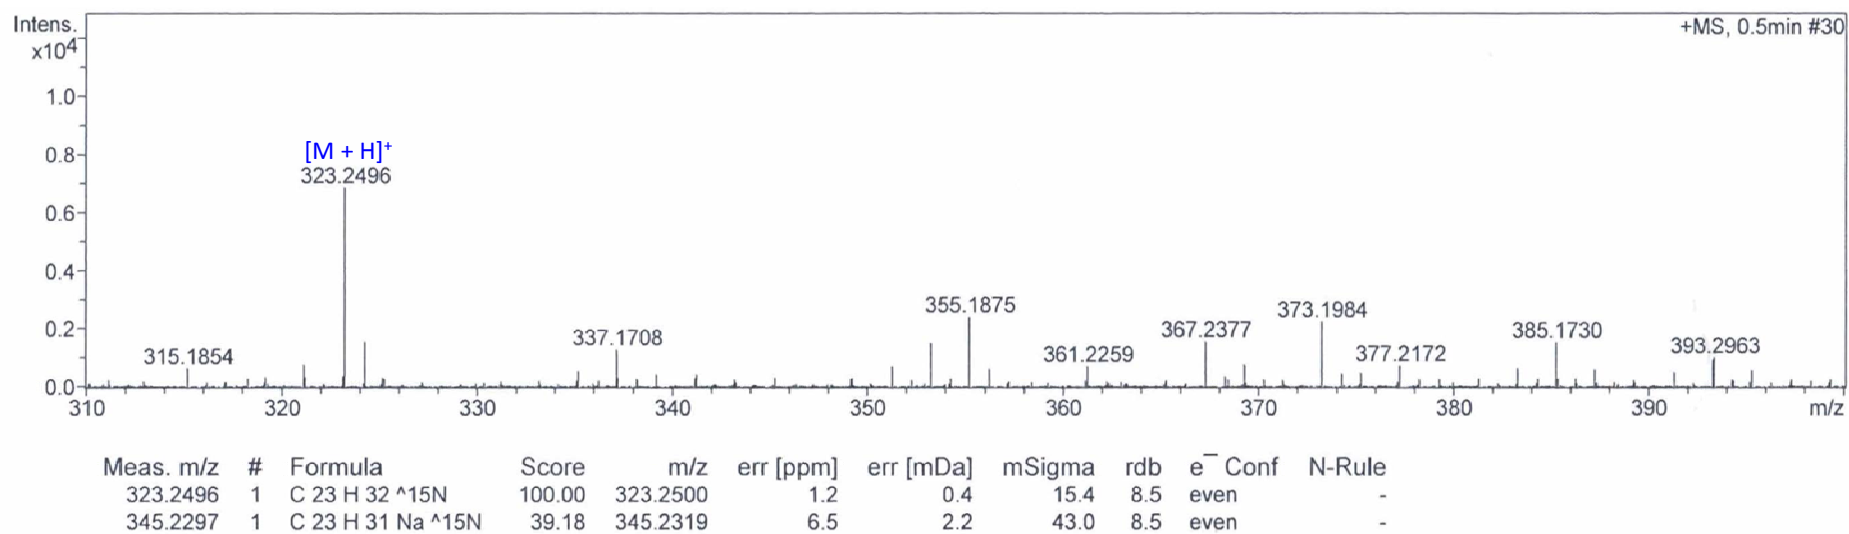

**Fig. S5**  $^{15}\text{N}$ -labelling related studies.

**(B)**  $^1\text{H}$  NMR spectrum of chemically synthesized  $^{15}\text{N}$ -labeled **2**. (500 MHz for  $^1\text{H}$  NMR in  $\text{CDCl}_3$ )

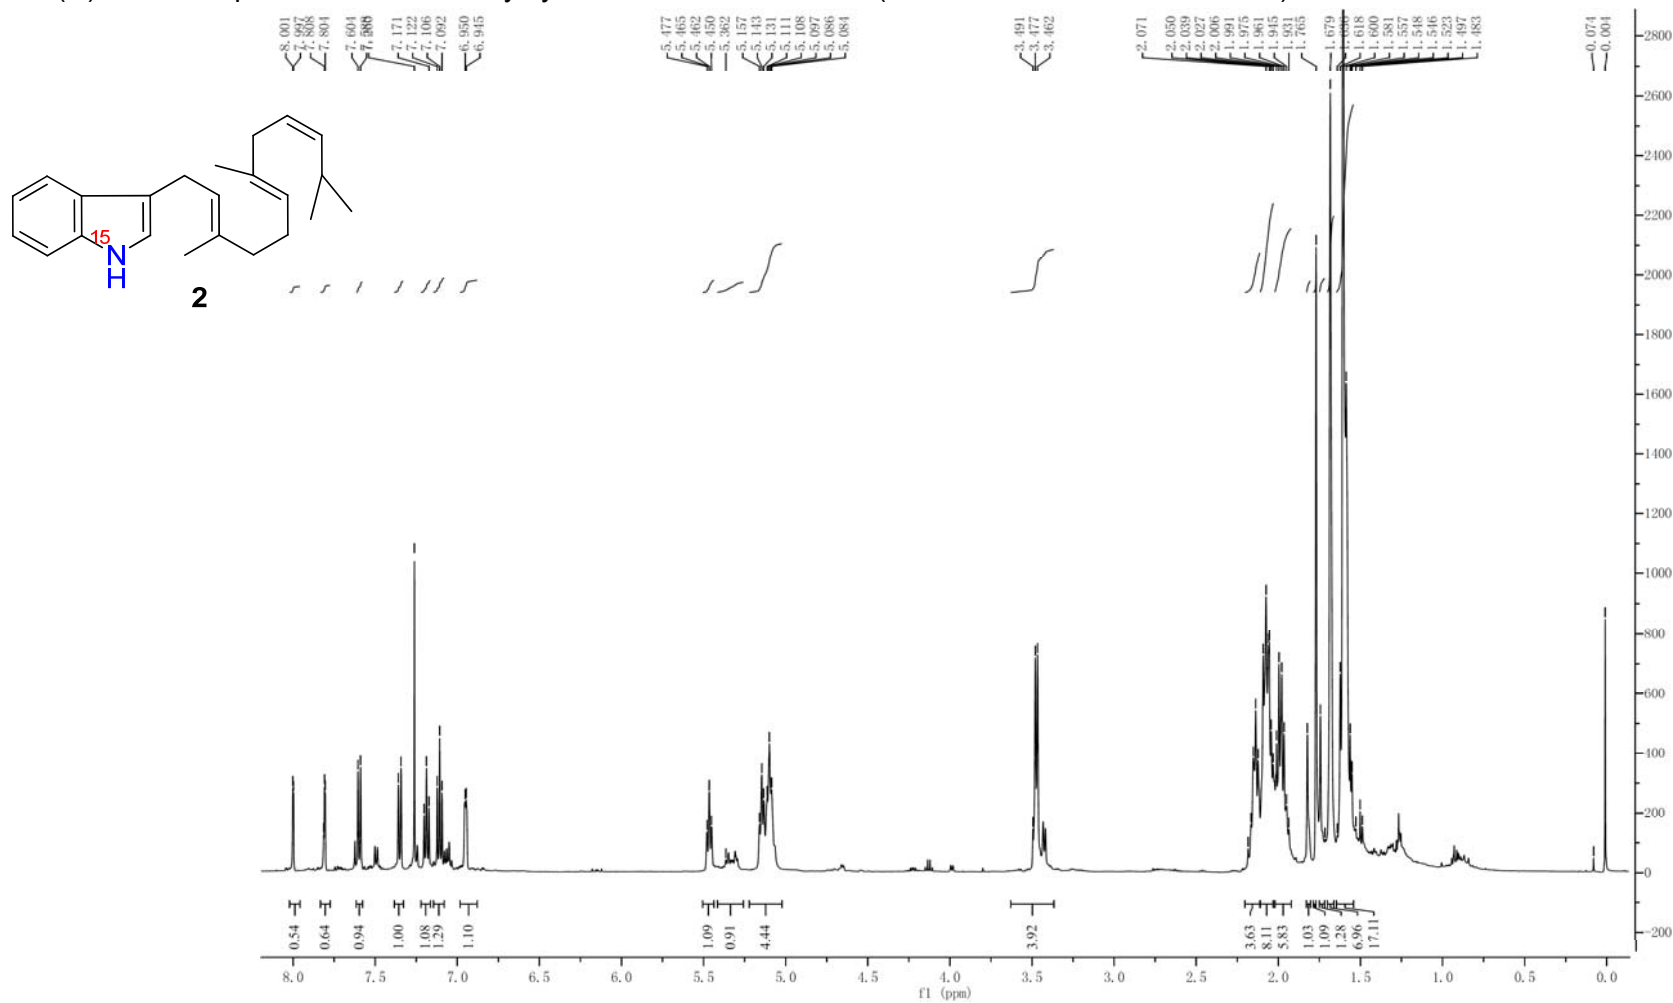

**Fig. S5**  $^{15}\text{N}$ -labelling related studies.

(C) HPLC analysis of feeding experiments of  $^{15}\text{N}$ -labeled **2** in *S. pactum* XM47i. (i) feeding of  $^{15}\text{N}$ -labeled **2** (147 mg) in *S. pactum* XM47i cultured in AM-4 meida (2 L); (ii) **2** standard; (iii) XMA (**1**) standard.

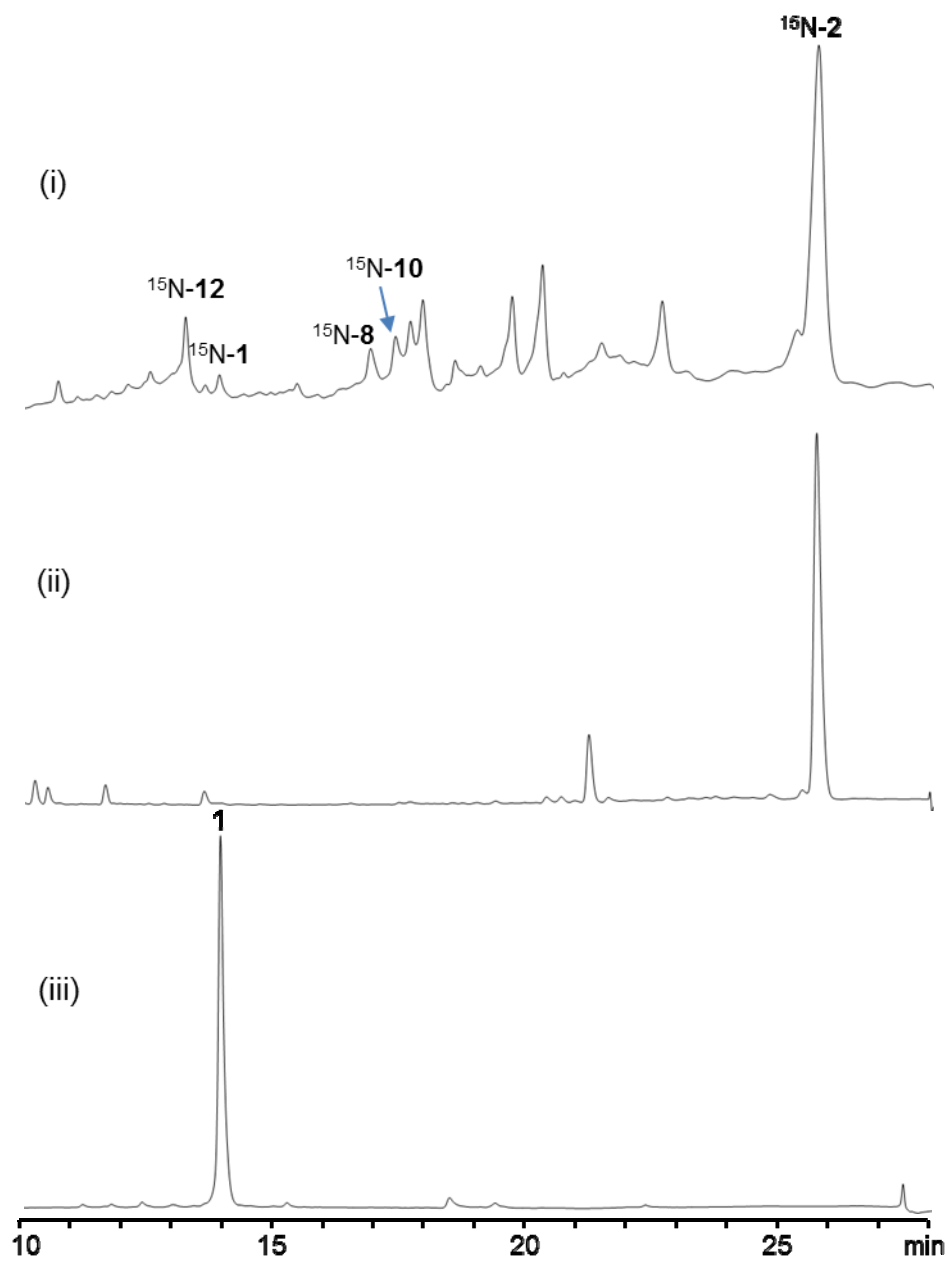

**Fig. S5**  $^{15}\text{N}$ -labelling related studies.

**(D)** HRESIMS of  $^{15}\text{N}$ -labeled **1** isolated from *S. pactum* XM47i and  $^{15}\text{N}$ -labeled **12** prepared from a XiaK reaction with  $^{15}\text{N}$ -labeled **1**.

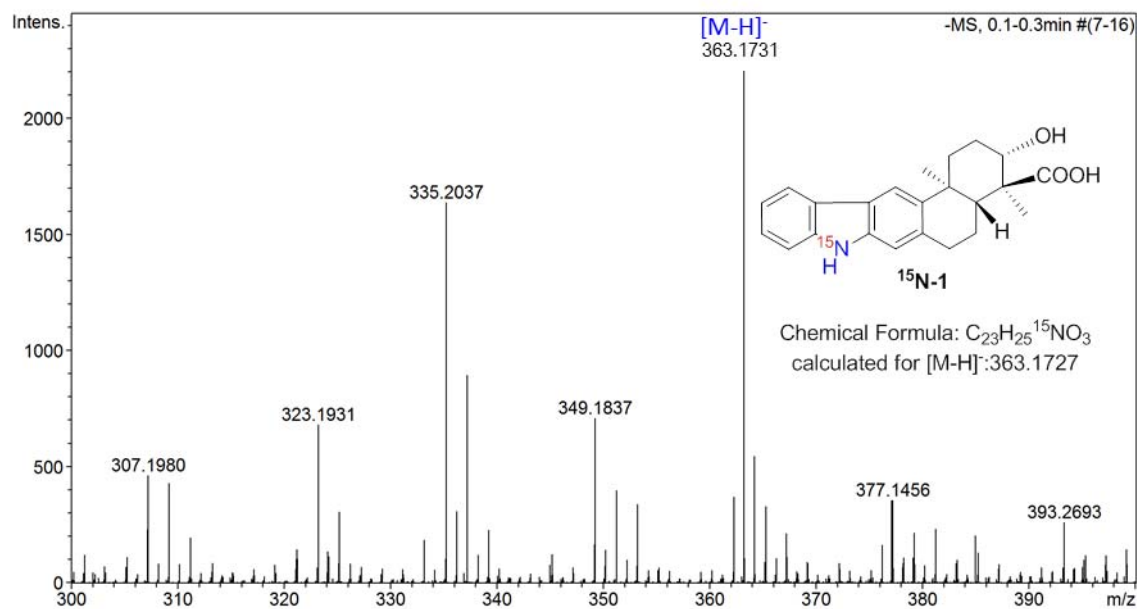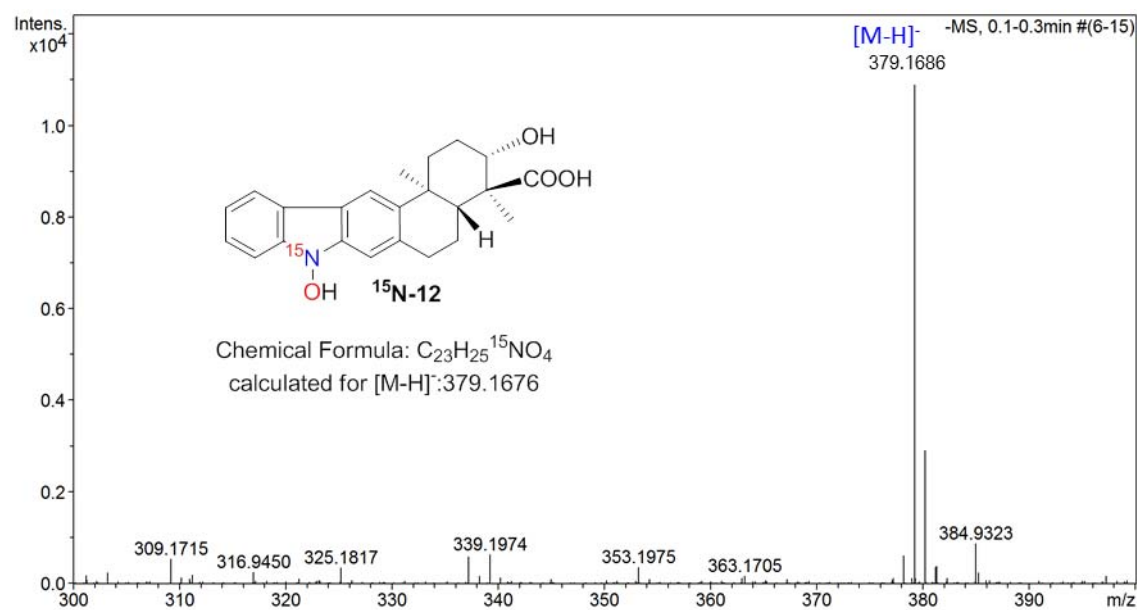

**Fig. S6** Construction of the in-frame deletion mutant XM47i ( $\Delta xiaP$ ).

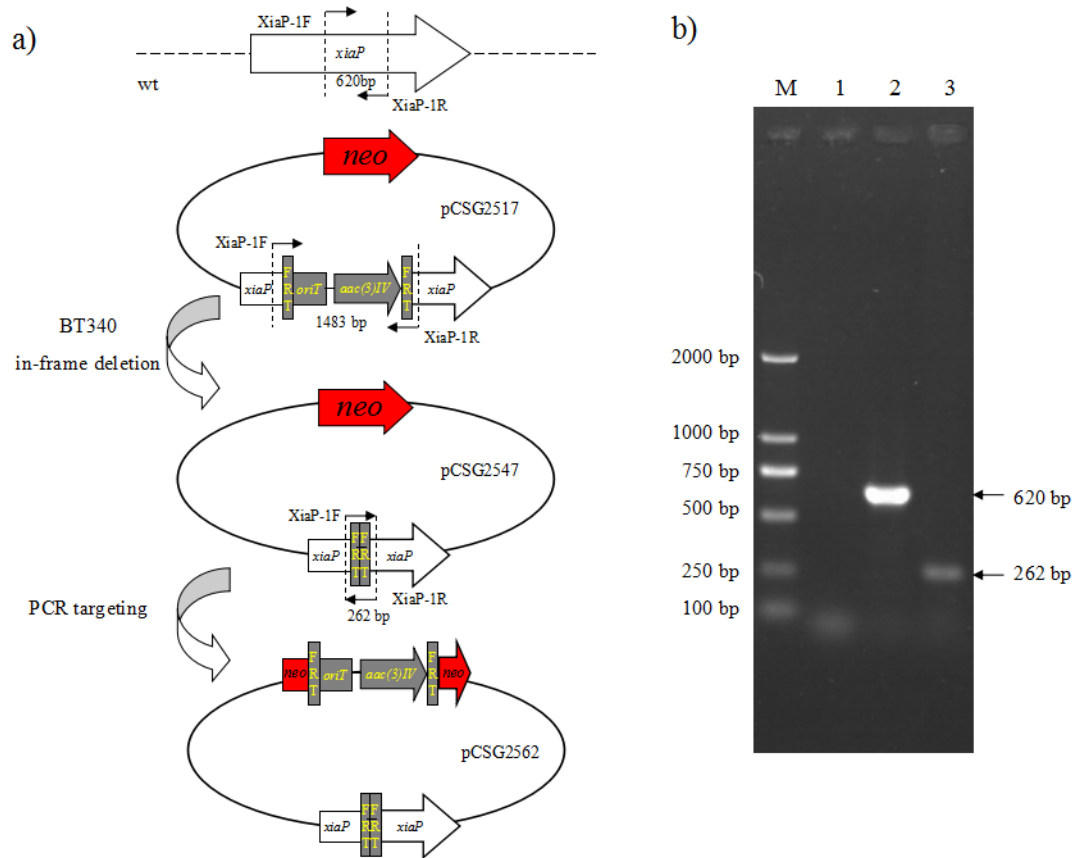

The *xiaP* gene in-frame deletion mutations were individually confirmed by diagnostic PCR. (a) Construction of the *xiaP* in-frame deletion vector pCSG2562. Location of the diagnostic PCR primers XiaP-1F and XiaP-1R (Table S1) was indicated. Sizes of PCR products, 620 bp for the wild type strain *S. pactum* SCSIO 02999 and 262 bp for the mutant XM47i, were also indicated. (b) Gel electrophoresis of PCR products. DNA templates were from: DNA marker DL 2000 (Takara, lane M); ddH<sub>2</sub>O (negative control, lane 1); wild type strain *S. pactum* SCSIO 02999 (lane 2) and mutant XM47i (lane 3).

**Fig. S7** Comparison of theoretical simulation and experimental EPR spectra of  $^{14}\text{N-12}$  and  $^{15}\text{N-7}$ .

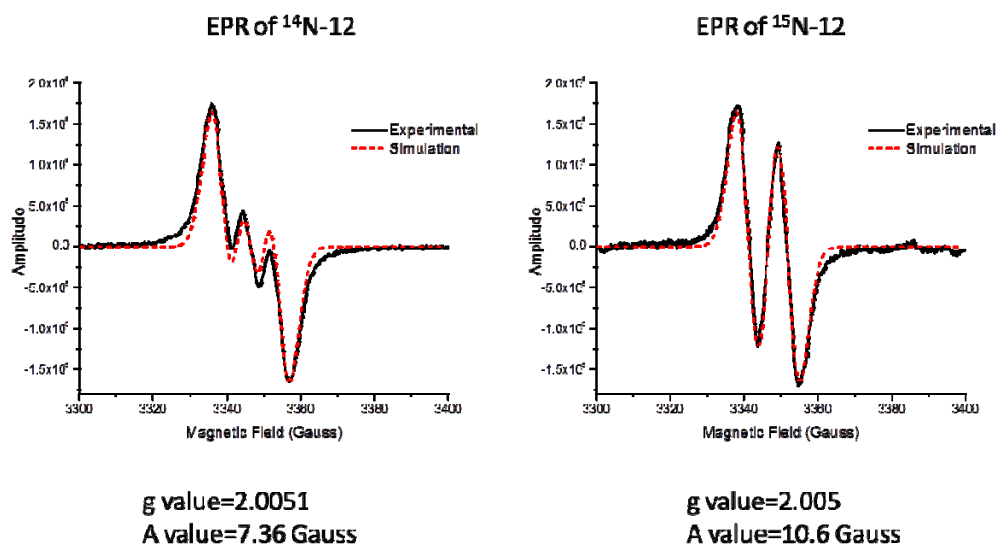

**Fig. S8** Estimation of the spin concentration of **12**.

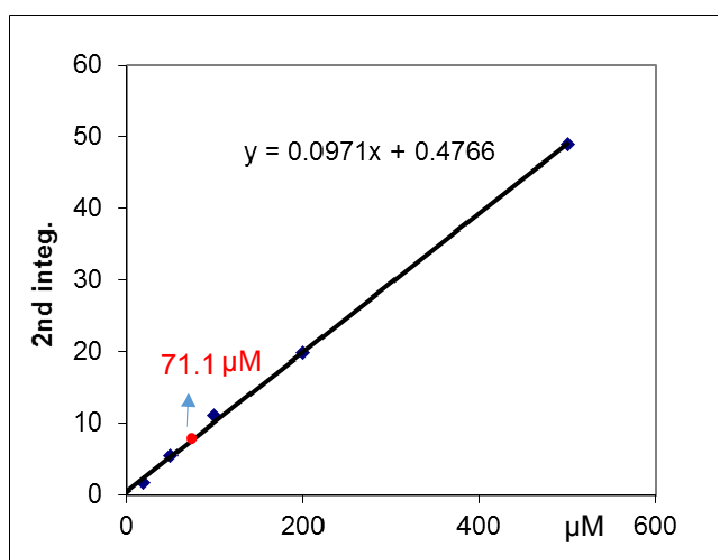

MTSL (1-oxyl-2,2,5,5-tetramethyl- $\Delta$ 3-pyrroline-3-methyl methanethiosulfonate) was used as a standard. A set of dilution with different concentration (20, 50, 100, 200, and 500  $\mu\text{M}$ ) was used as spin concentration estimation; the spin concentration (red spot •) of **12** at a concentration of 2 mM in MeOH was estimated to be 71.1  $\mu\text{M}$ , indicating a ratio of around 3.6%.

**Fig. S9** Phylogenetic analysis of XiaK with other flavoenzymes.

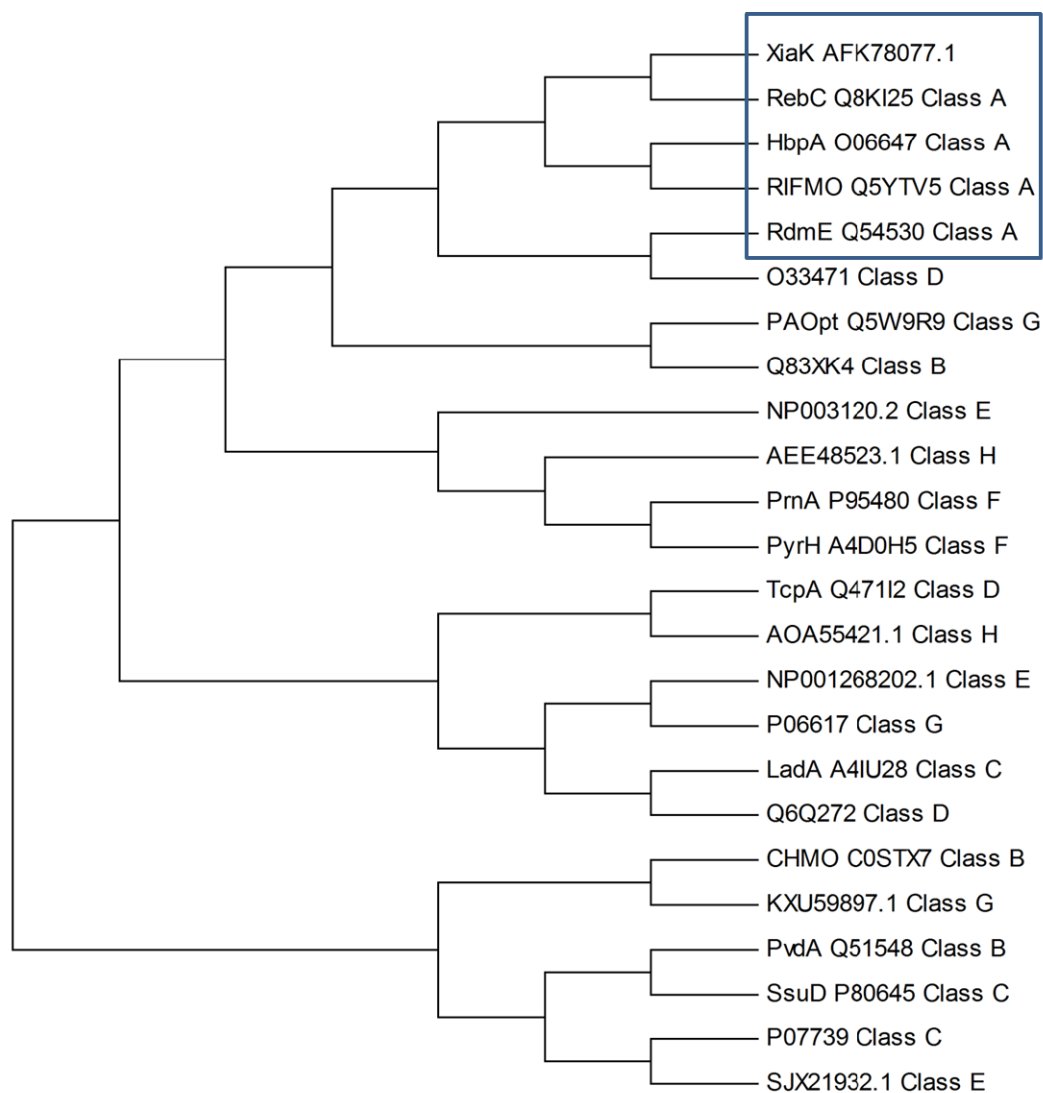



**Fig. S10** Comparison of well aligned XiaK structure model and the crystal structures of Class A flavoprotein monooxygenases

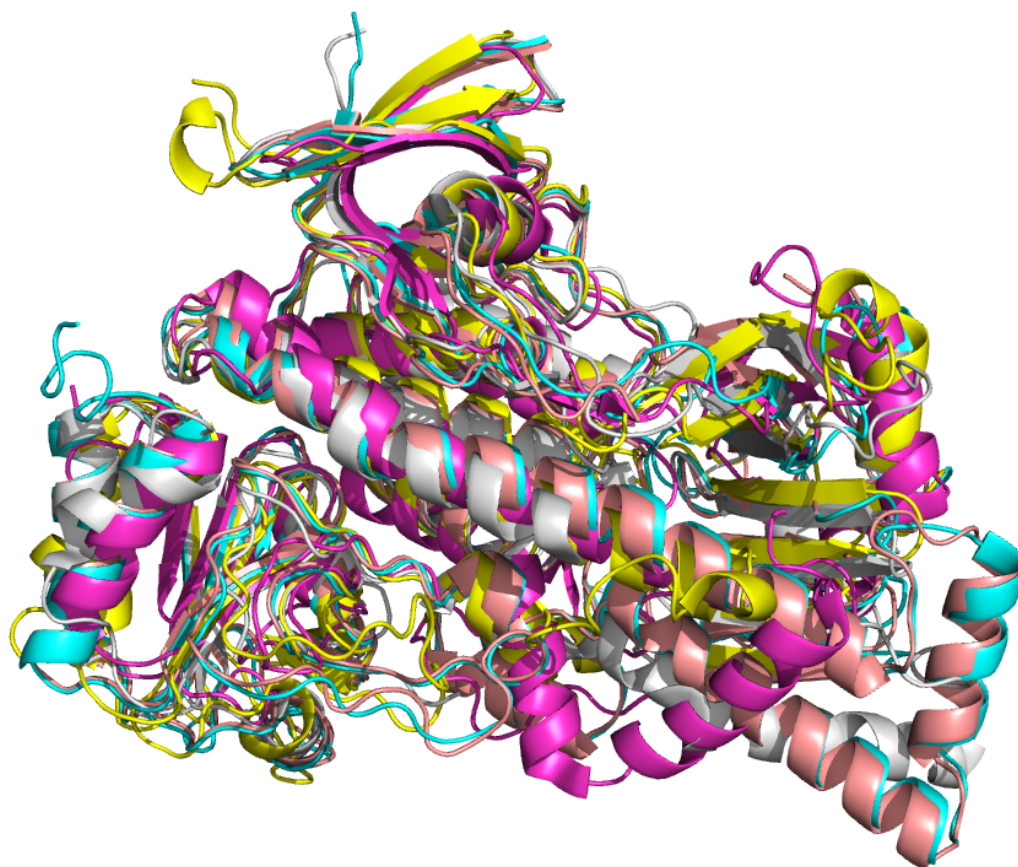

The 3D-model of XiaK (cyan carton) was built by I-TASSER online server and structures alignment was processed with Pymol. A survey of the Protein Data Bank shows that the closes structural homologs of XiaK to be RdmE (yellow, PDB code 3IHG<sup>16</sup>), HbpA (salmon, PDB code 5BRT<sup>17</sup>), RifMO (magenta, PDB code 5KOW<sup>18</sup>) and RebC (grey, PDB code 2R0C<sup>19</sup>), which are all class A flavoprotein monooxygenases. According to Phylogenetic analysis, sequence and structural comparisons, XiaK is considered to be a member of class A flavoprotein monooxygenases.<sup>20-22</sup>

**Fig. S11** Sequence Comparison of XiaK and four class A flavoprotein monooxygenases.

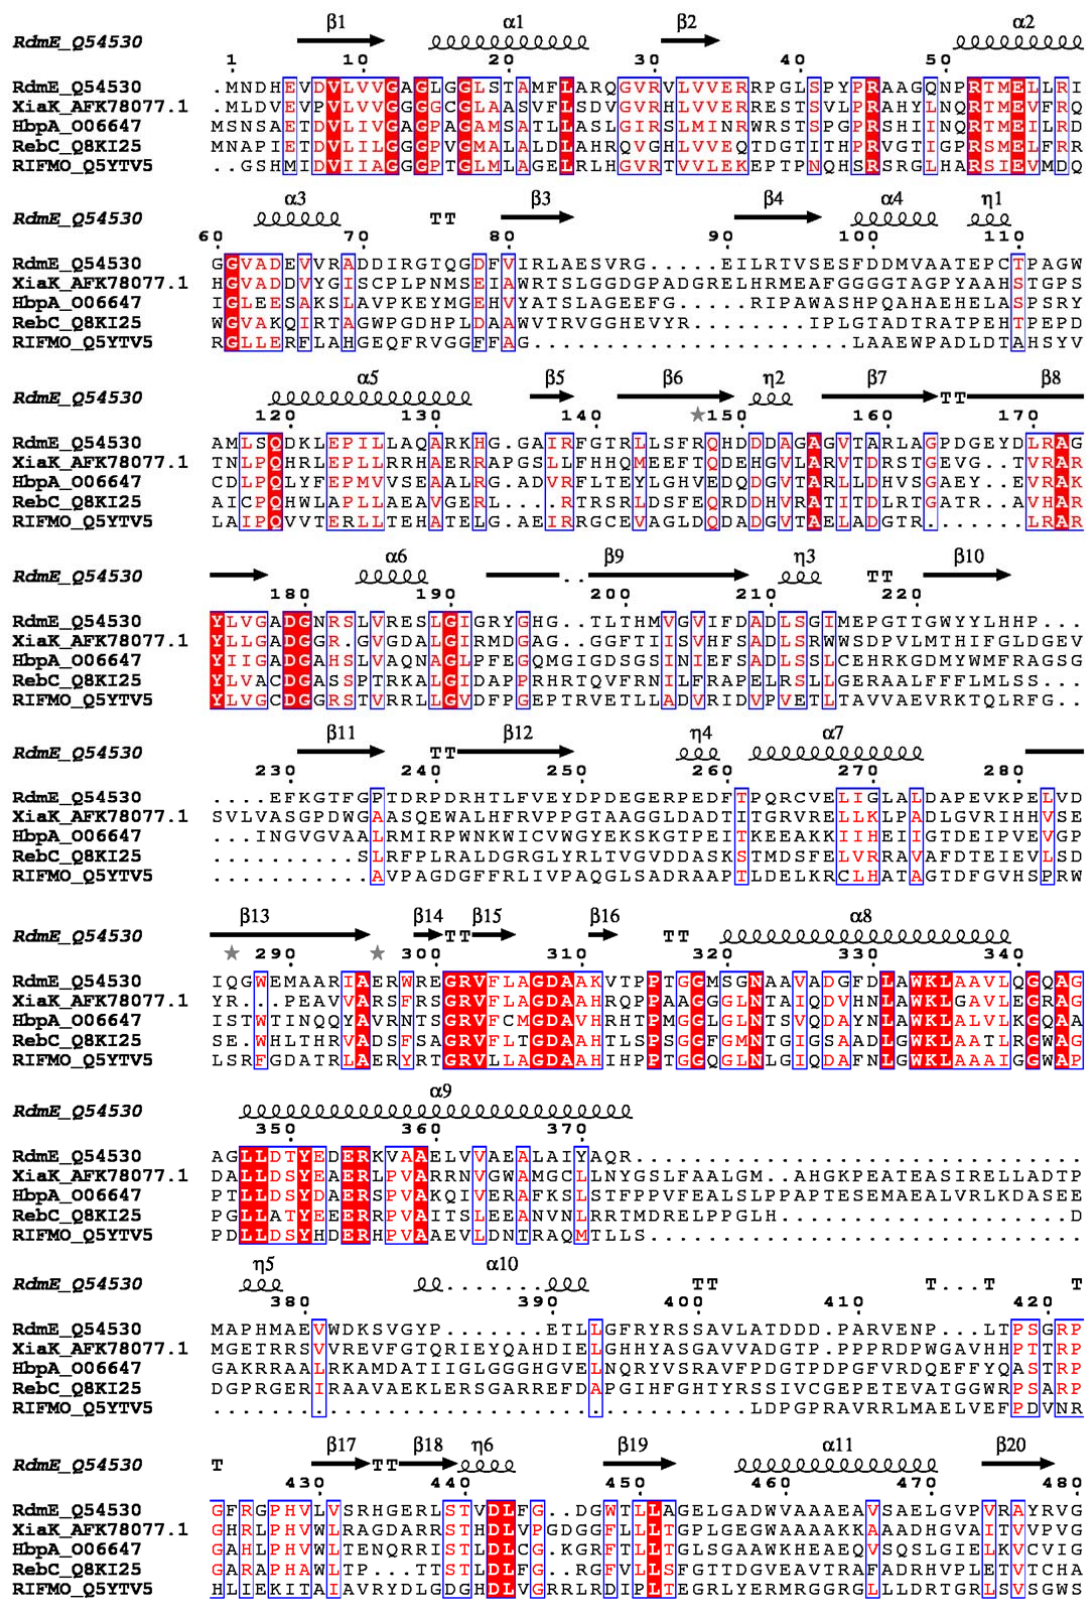

XiaK consists of a conserved motif of glycine residues GXGXXG and secondary structure of  $\beta\alpha\beta$ -Rossmann fold, which are characteristics of FAD binding domain.

**Fig. S12** UV-Vis and HRESIMS spectra of **16**.

(A) UV-vis spectrum of **16**.

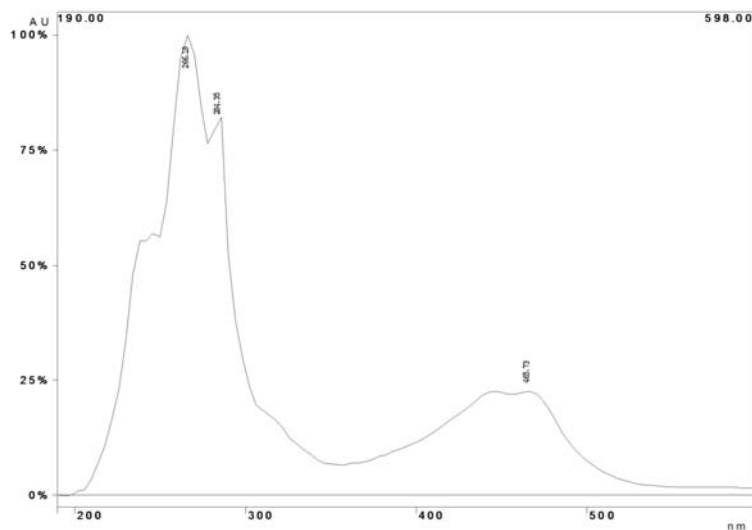

(B) HRESIMS spectrum of **16**.

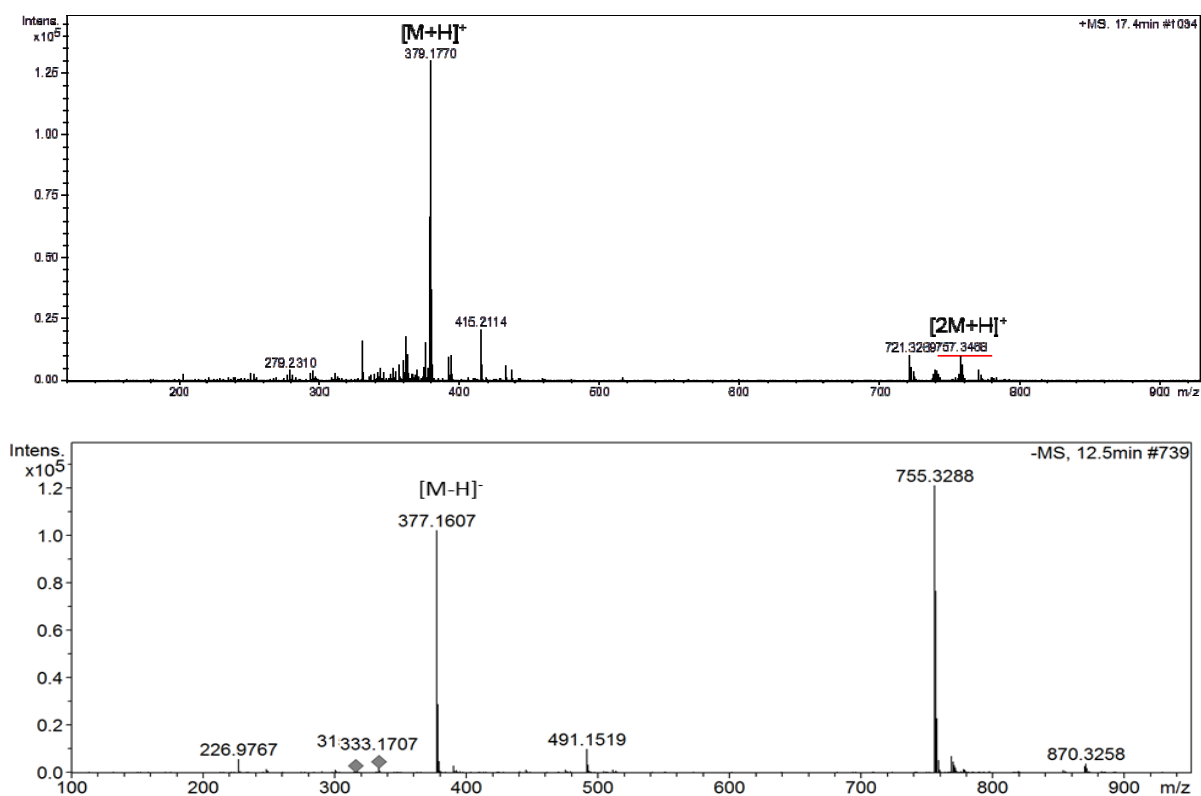

**Fig. S13** Comparison of UV-vis spectra of **1**, **17** and **18**.

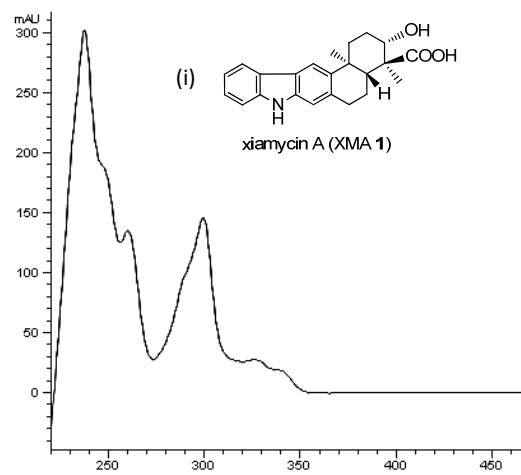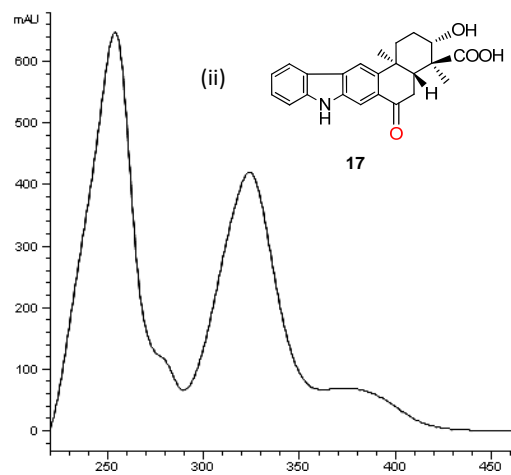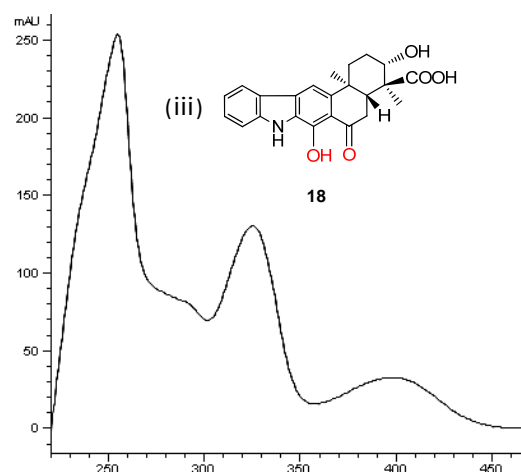

**Fig. S14** The spectral data of **17** ( 600 MHz for  $^1\text{H}$  NMR, 150 MHz for  $^{13}\text{C}$  NMR,  $\text{CD}_3\text{OD}$  )

**(A)** The HRESIMS spectrum of **17**.

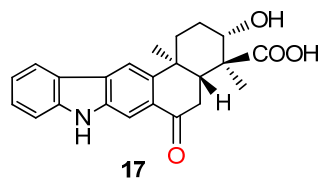

Chemical Formula:  $\text{C}_{23}\text{H}_{23}\text{NO}_4$

$[\text{M} - \text{H}]^-$ : calcd. 376.1554

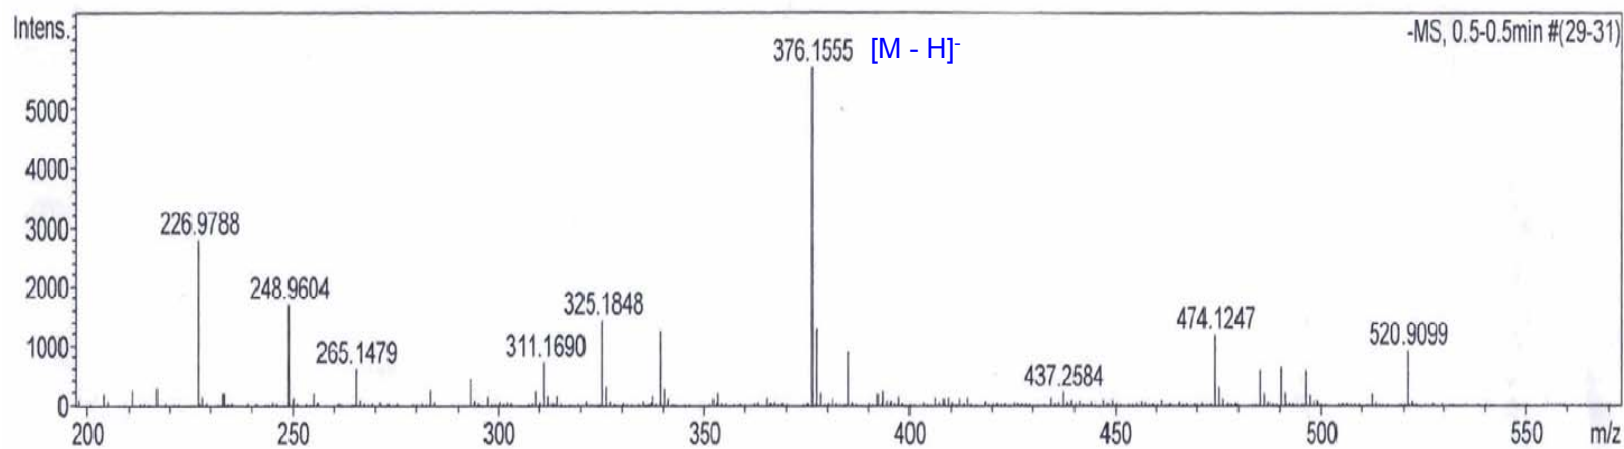

**Fig. S14** The spectral data of **17**. ( 600 MHz for  $^1\text{H}$  NMR, 150 MHz for  $^{13}\text{C}$  NMR,  $\text{CD}_3\text{OD}$  )

**(B)** The  $^1\text{H}$ -NMR spectrum of **17**.

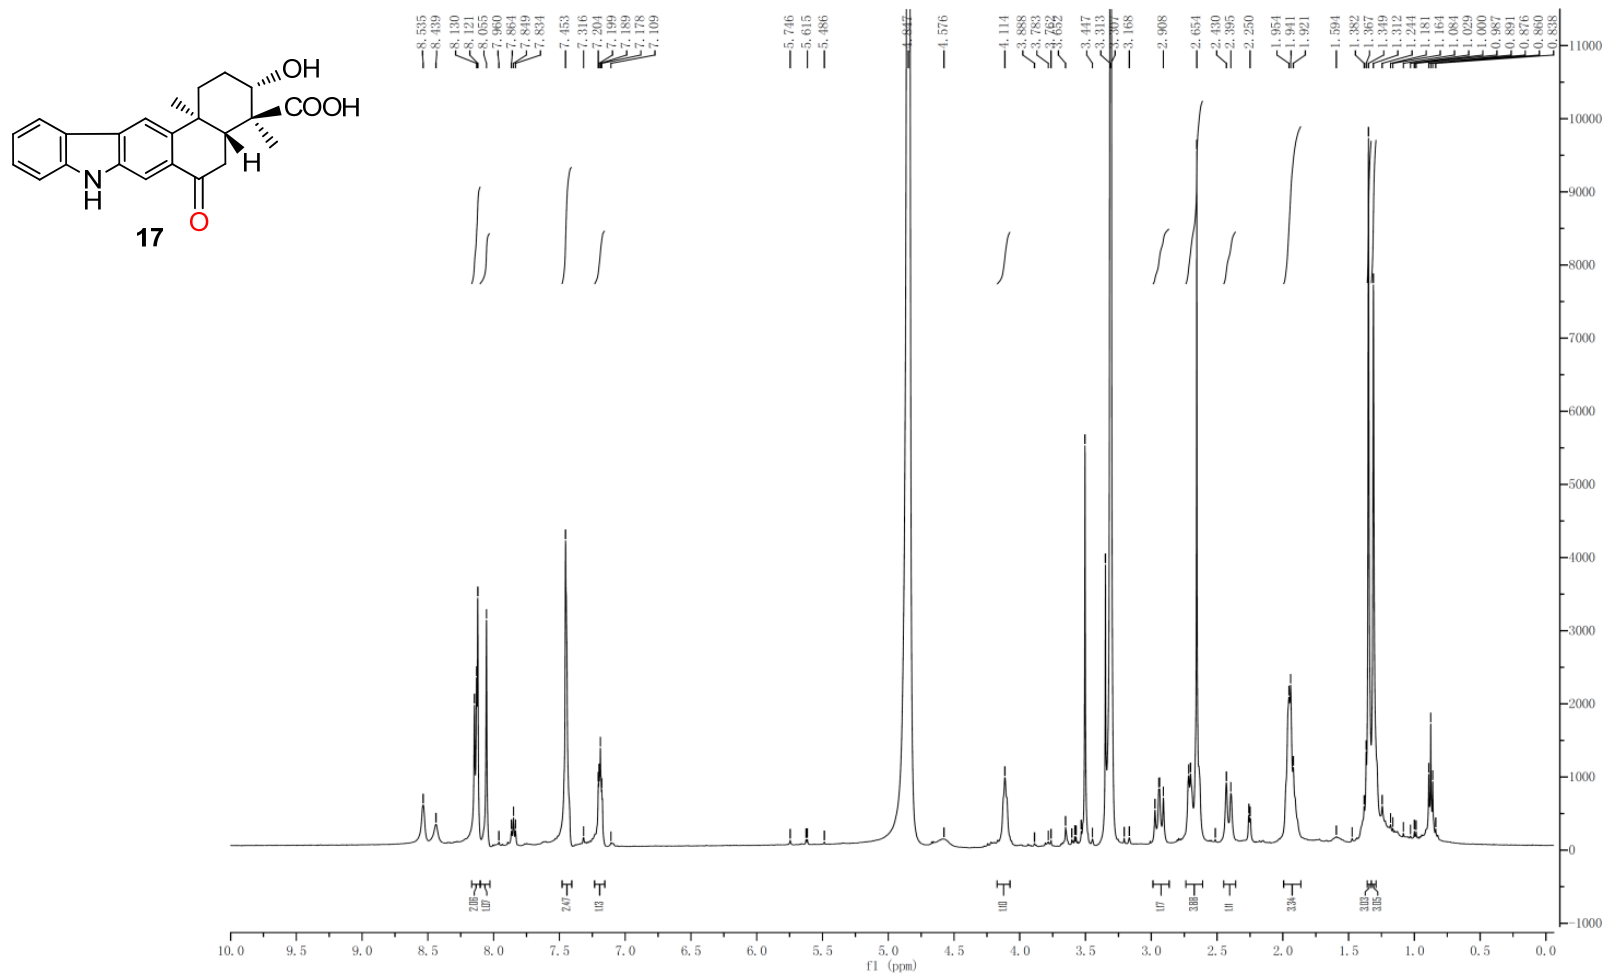

**Fig. S14** The spectral data of **17** ( 600 MHz for  $^1\text{H}$  NMR, 150 MHz for  $^{13}\text{C}$  NMR,  $\text{CD}_3\text{OD}$  )  
**(C)** The  $^{13}\text{C}$ -NMR spectrum of **17**.

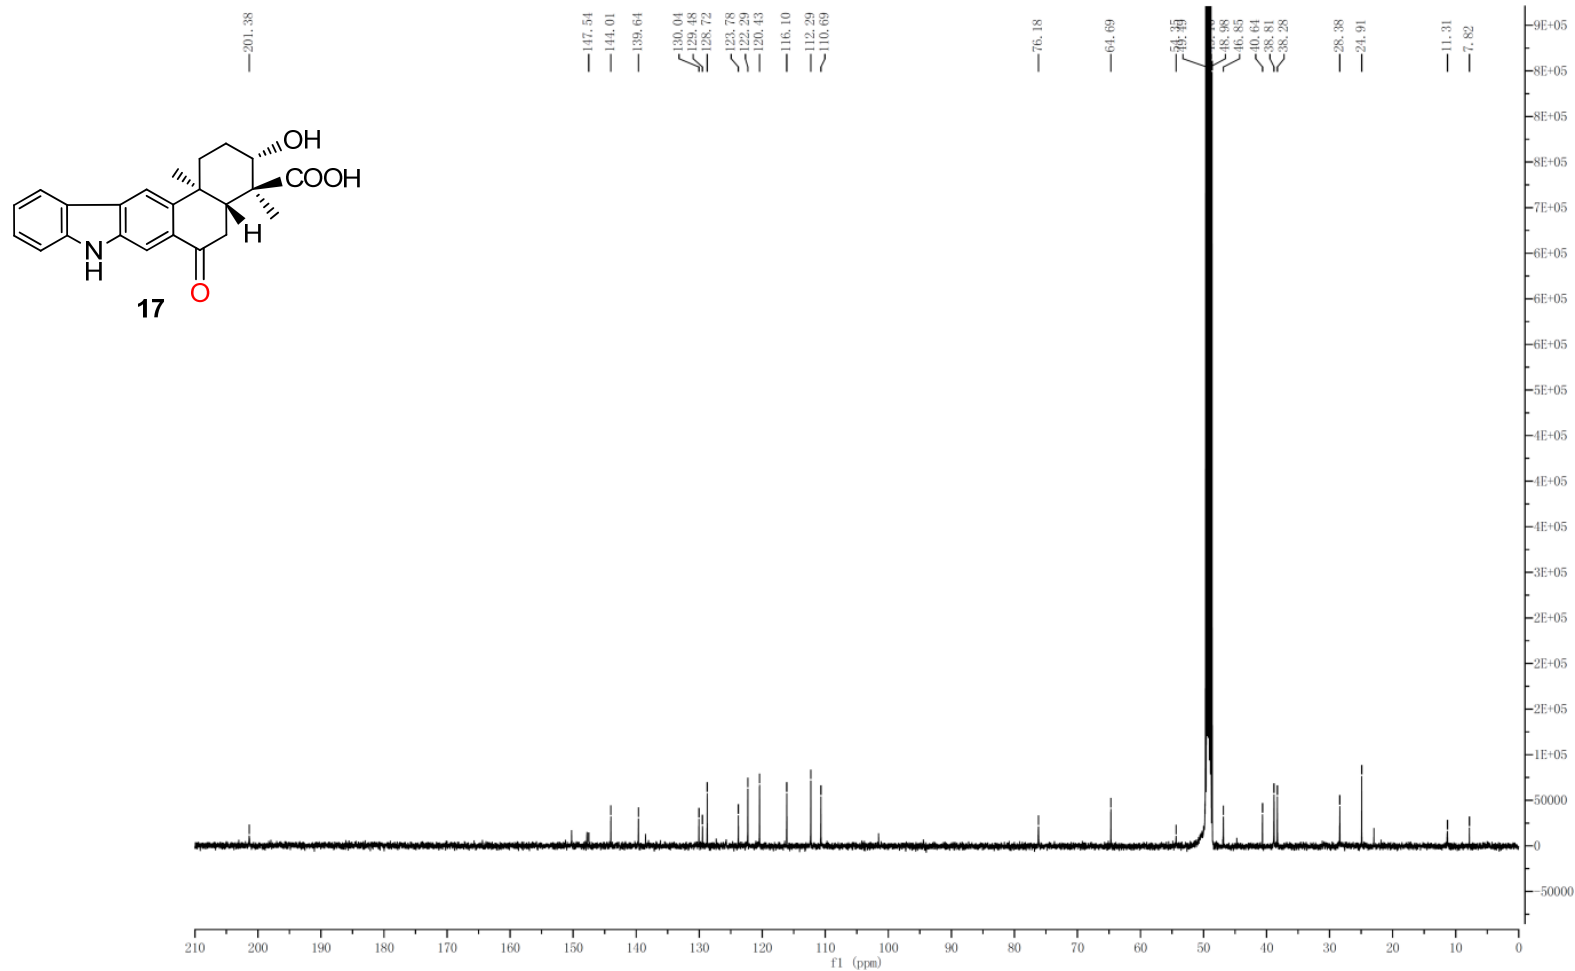

**Fig. S14** The spectral data of **17** ( 600 MHz for  $^1\text{H}$  NMR, 150 MHz for  $^{13}\text{C}$  NMR,  $\text{CD}_3\text{OD}$  )  
**(D)** The DEPT135 spectrum of **17**.

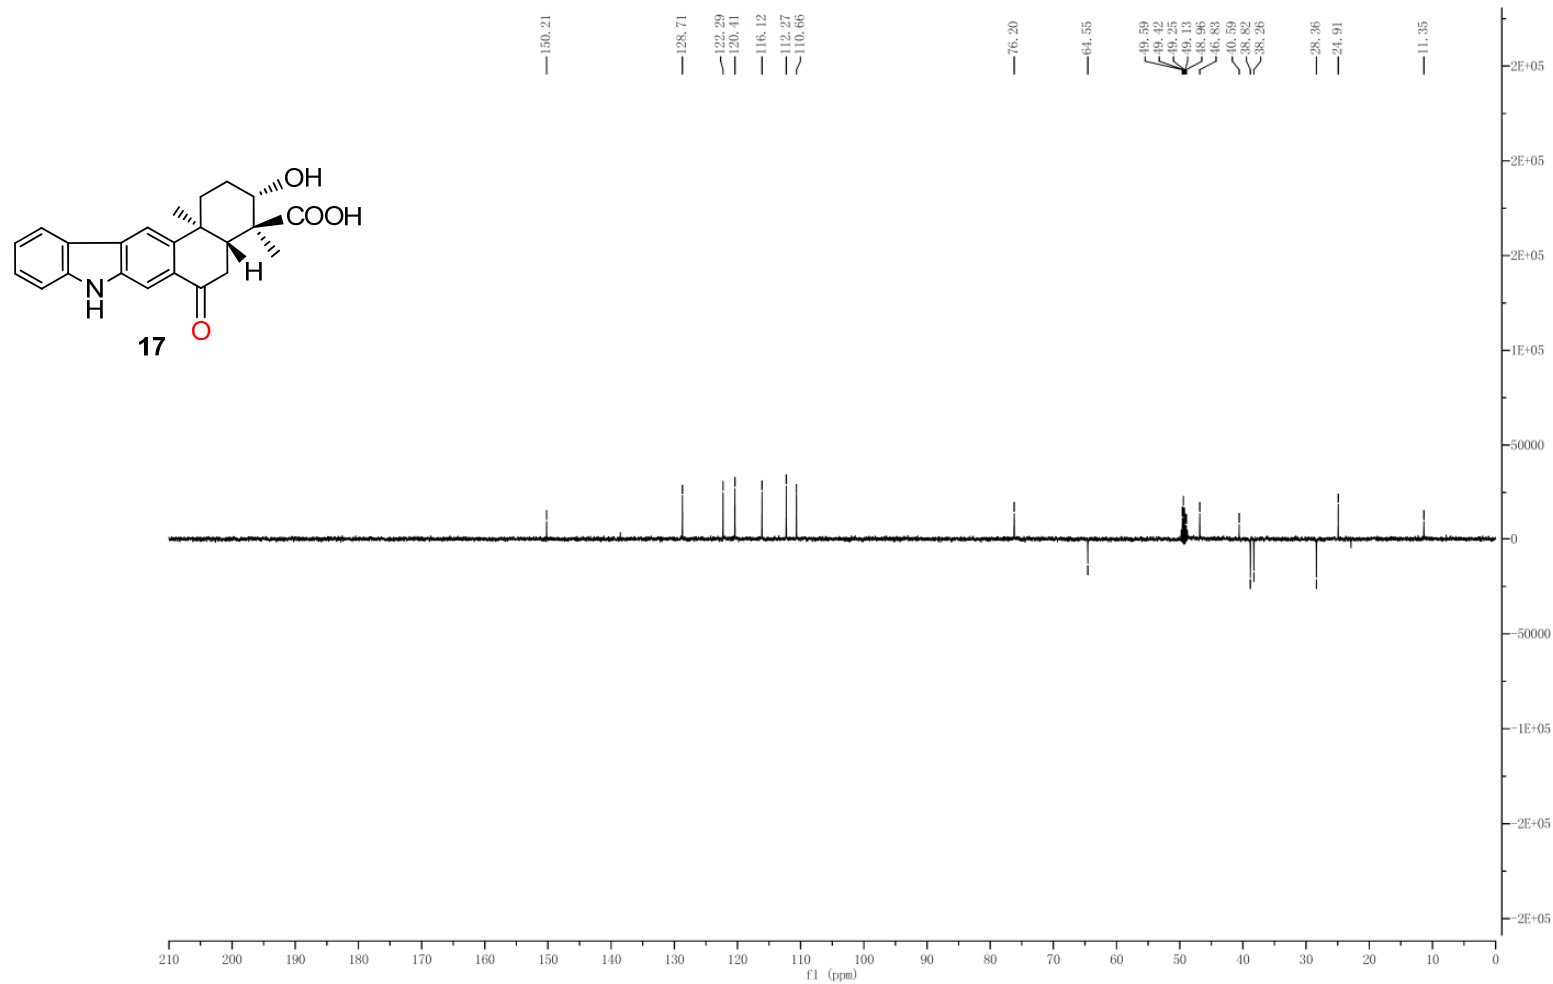



**Fig. S14** The spectral data of **17** ( 600 MHz for  $^1\text{H}$  NMR, 150 MHz for  $^{13}\text{C}$  NMR,  $\text{CD}_3\text{OD}$  )  
**(E)** The HSQC spectrum of **17**

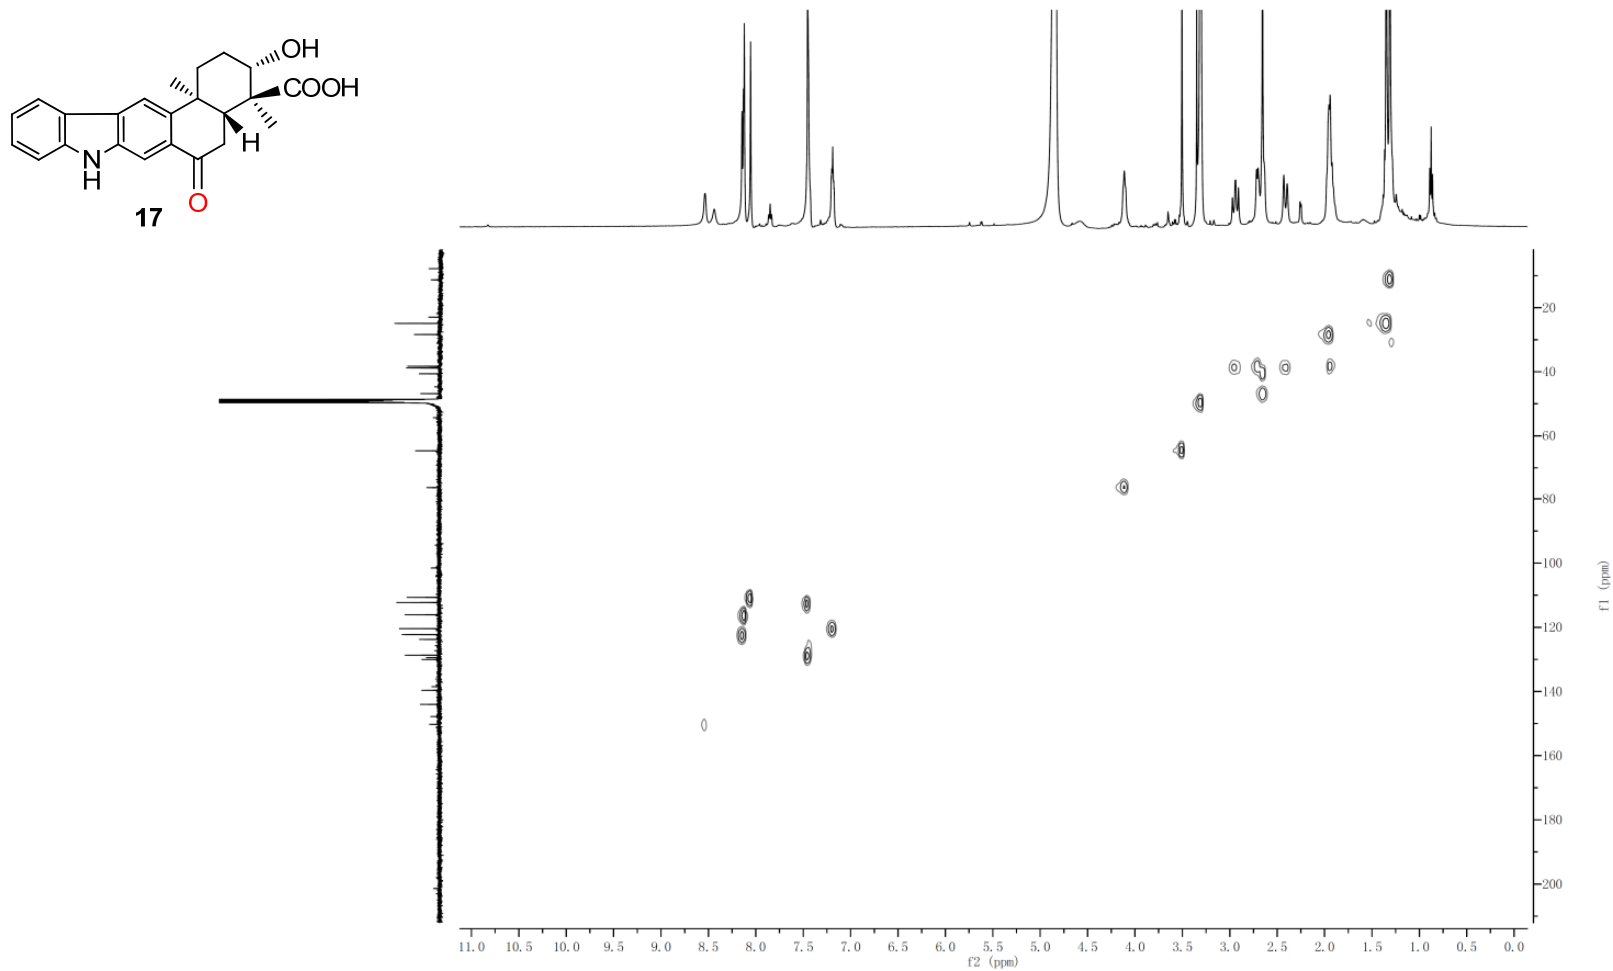

**Fig. S14** The spectral data of **17** ( 600 MHz for  $^1\text{H}$  NMR, 150 MHz for  $^{13}\text{C}$  NMR,  $\text{CD}_3\text{OD}$  )  
**(F)** The  $^1\text{H}$ - $^1\text{H}$  COSY spectrum of **17**

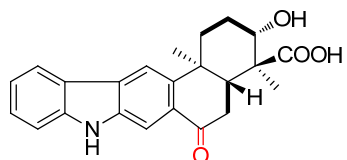

**17**

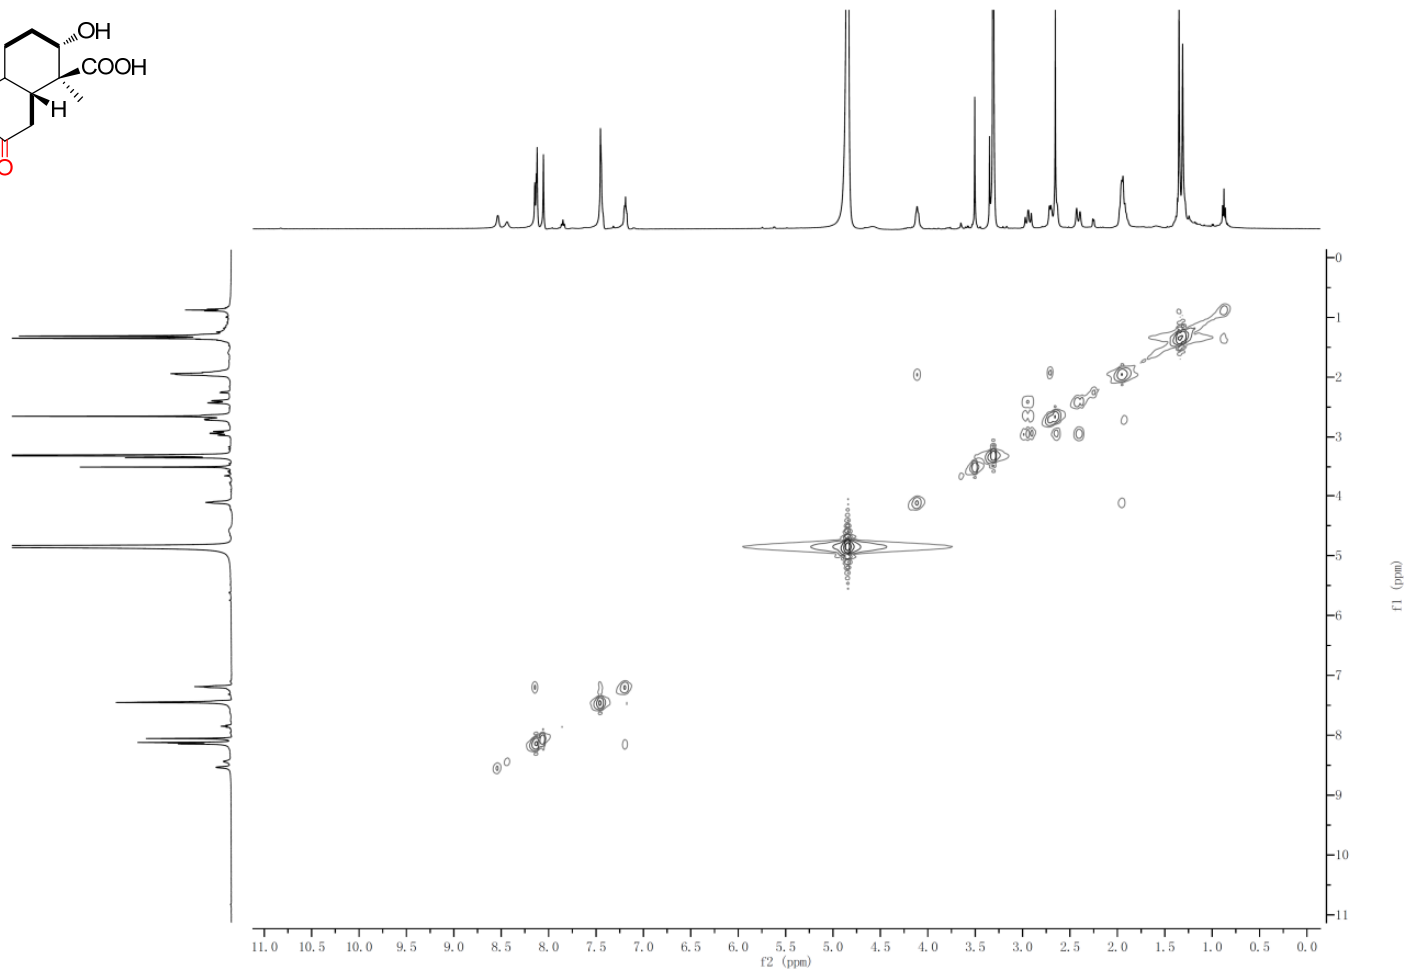

**Fig. S14** The spectral data of **17** ( 600 MHz for  $^1\text{H}$  NMR, 150 MHz for  $^{13}\text{C}$  NMR,  $\text{CD}_3\text{OD}$  )  
**(G)** The HMBC spectrum of **13**

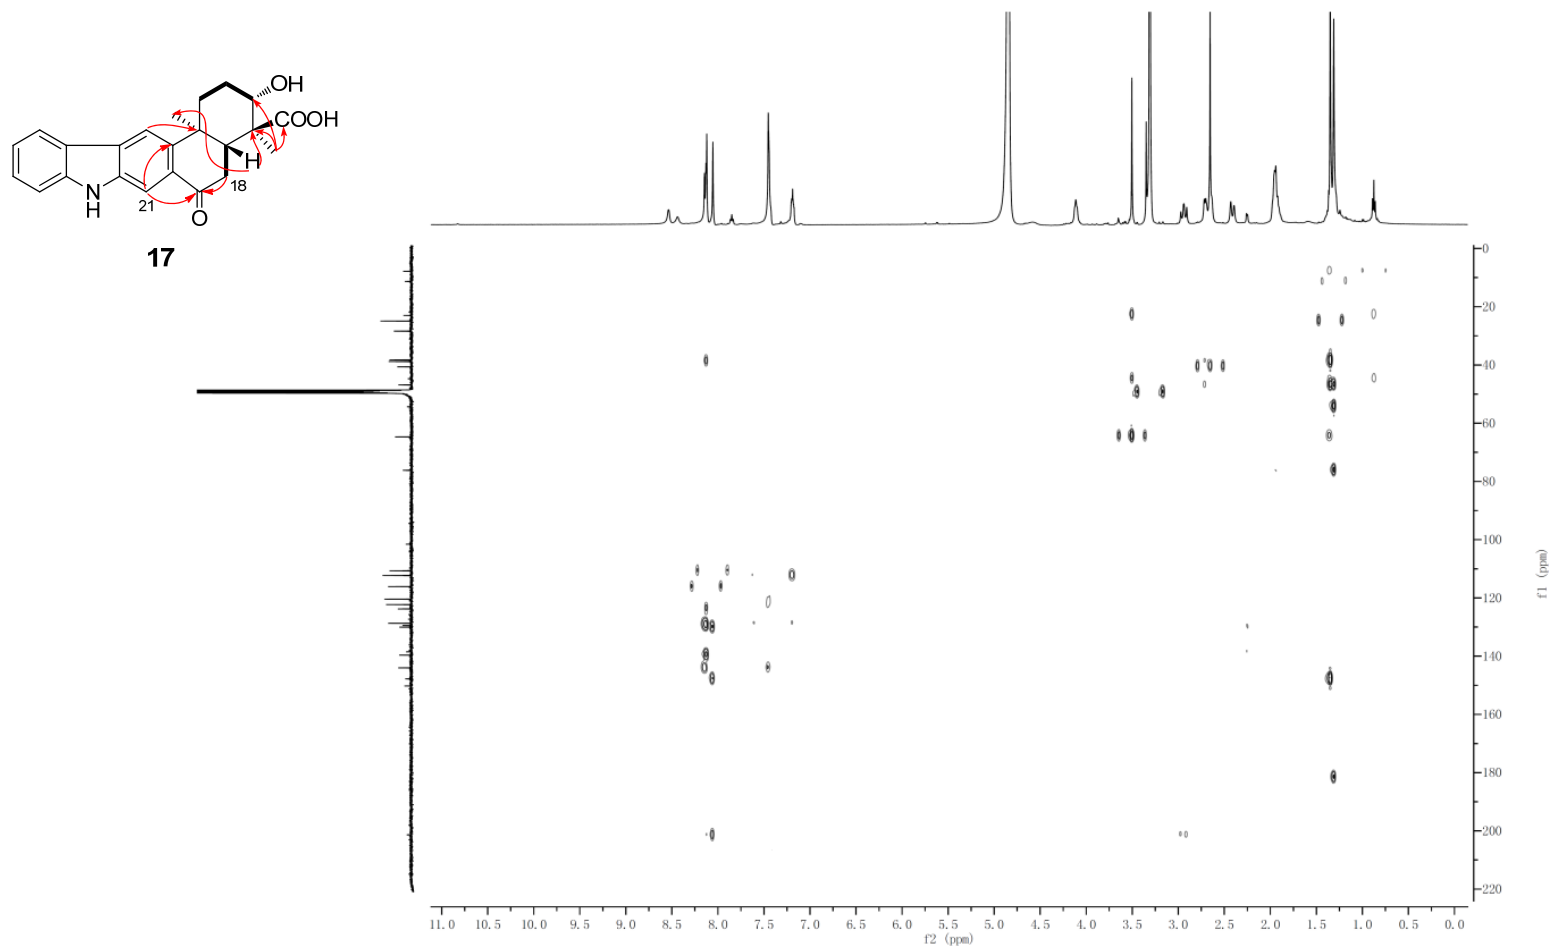

**Fig. S15** The spectral data of **18** ( 600 MHz for  $^1\text{H}$  NMR, 150 MHz for  $^{13}\text{C}$  NMR,  $\text{CD}_3\text{OD}$  )  
(A) The HRESIMS spectrum of **18**.

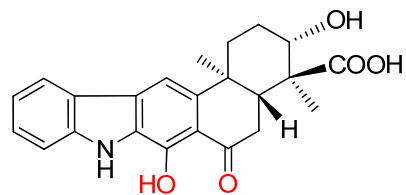

**18**

Chemical Formula:  $\text{C}_{23}\text{H}_{23}\text{NO}_5$

$[\text{M} - \text{H}]^-$ : calcd. 392.1503

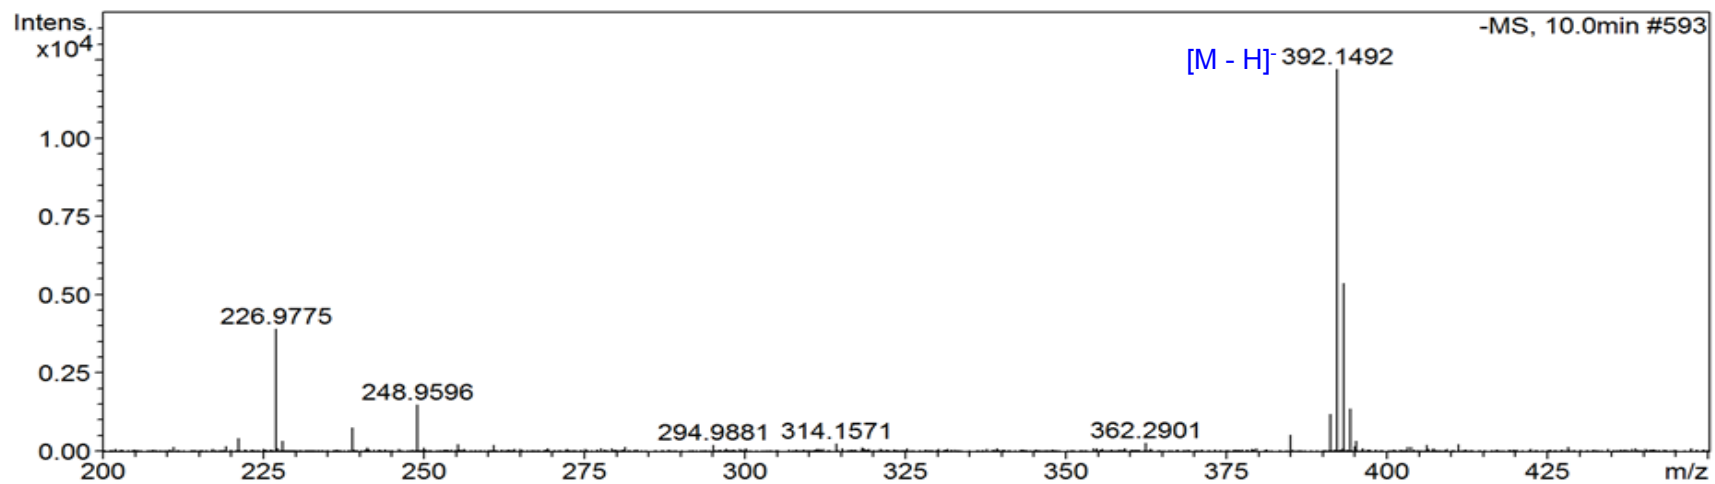

**Fig. S15** The spectral data of **18** ( 600 MHz for  $^1\text{H}$  NMR, 150 MHz for  $^{13}\text{C}$  NMR,  $\text{CD}_3\text{OD}$  )

**(B)** The  $^1\text{H}$ -NMR spectrum of **18**.

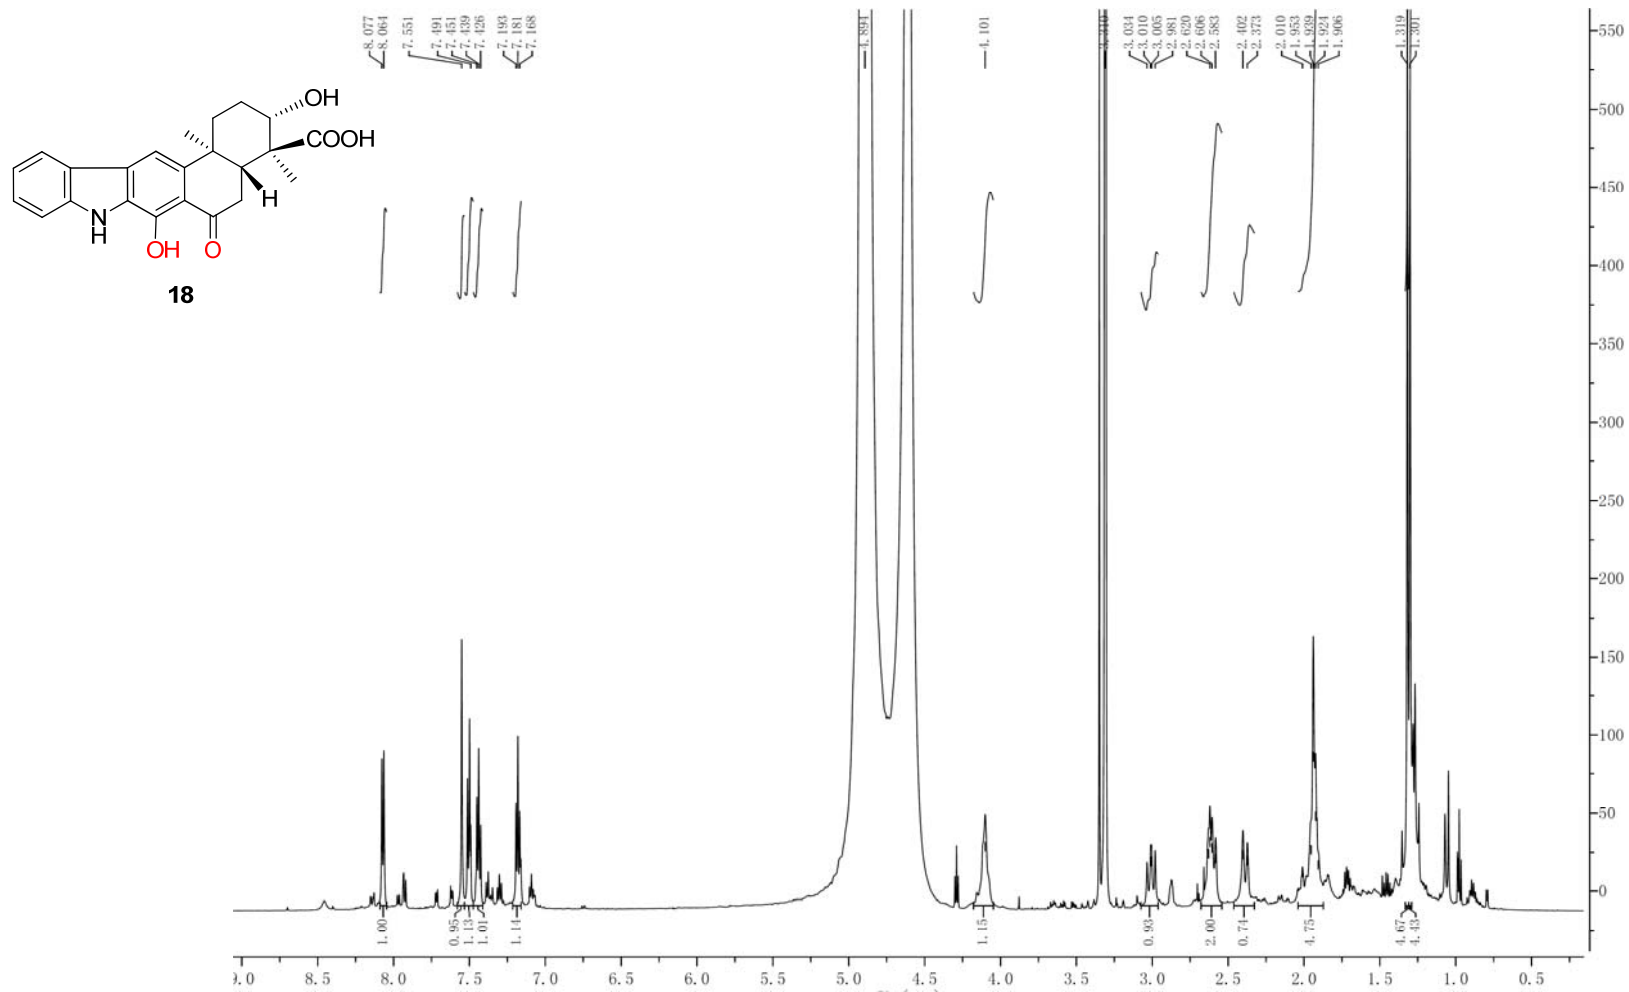

**Fig. S15** The spectral data of **18** ( 600 MHz for  $^1\text{H}$  NMR, 150 MHz for  $^{13}\text{C}$  NMR,  $\text{CD}_3\text{OD}$  )  
**(C)** The  $^{13}\text{C}$ -NMR spectrum of **18**.

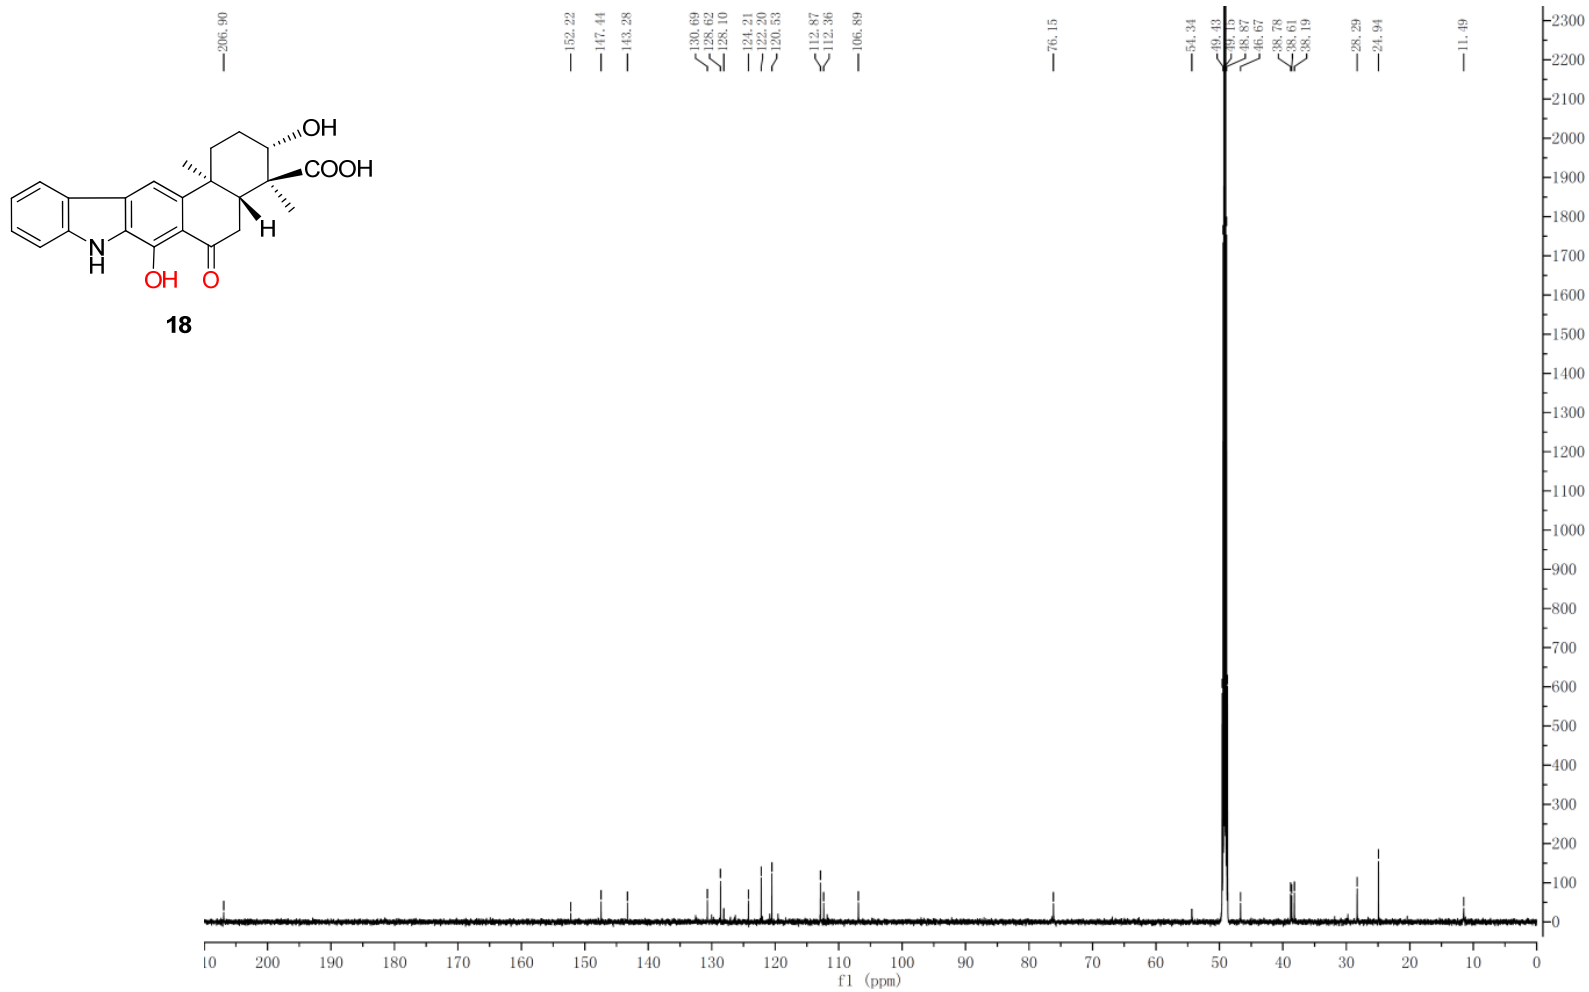

**Fig. S15** The spectral data of **18** ( 600 MHz for  $^1\text{H}$  NMR, 150 MHz for  $^{13}\text{C}$  NMR,  $\text{CD}_3\text{OD}$  )  
**(D)** The DEPT135 spectrum of **18**.

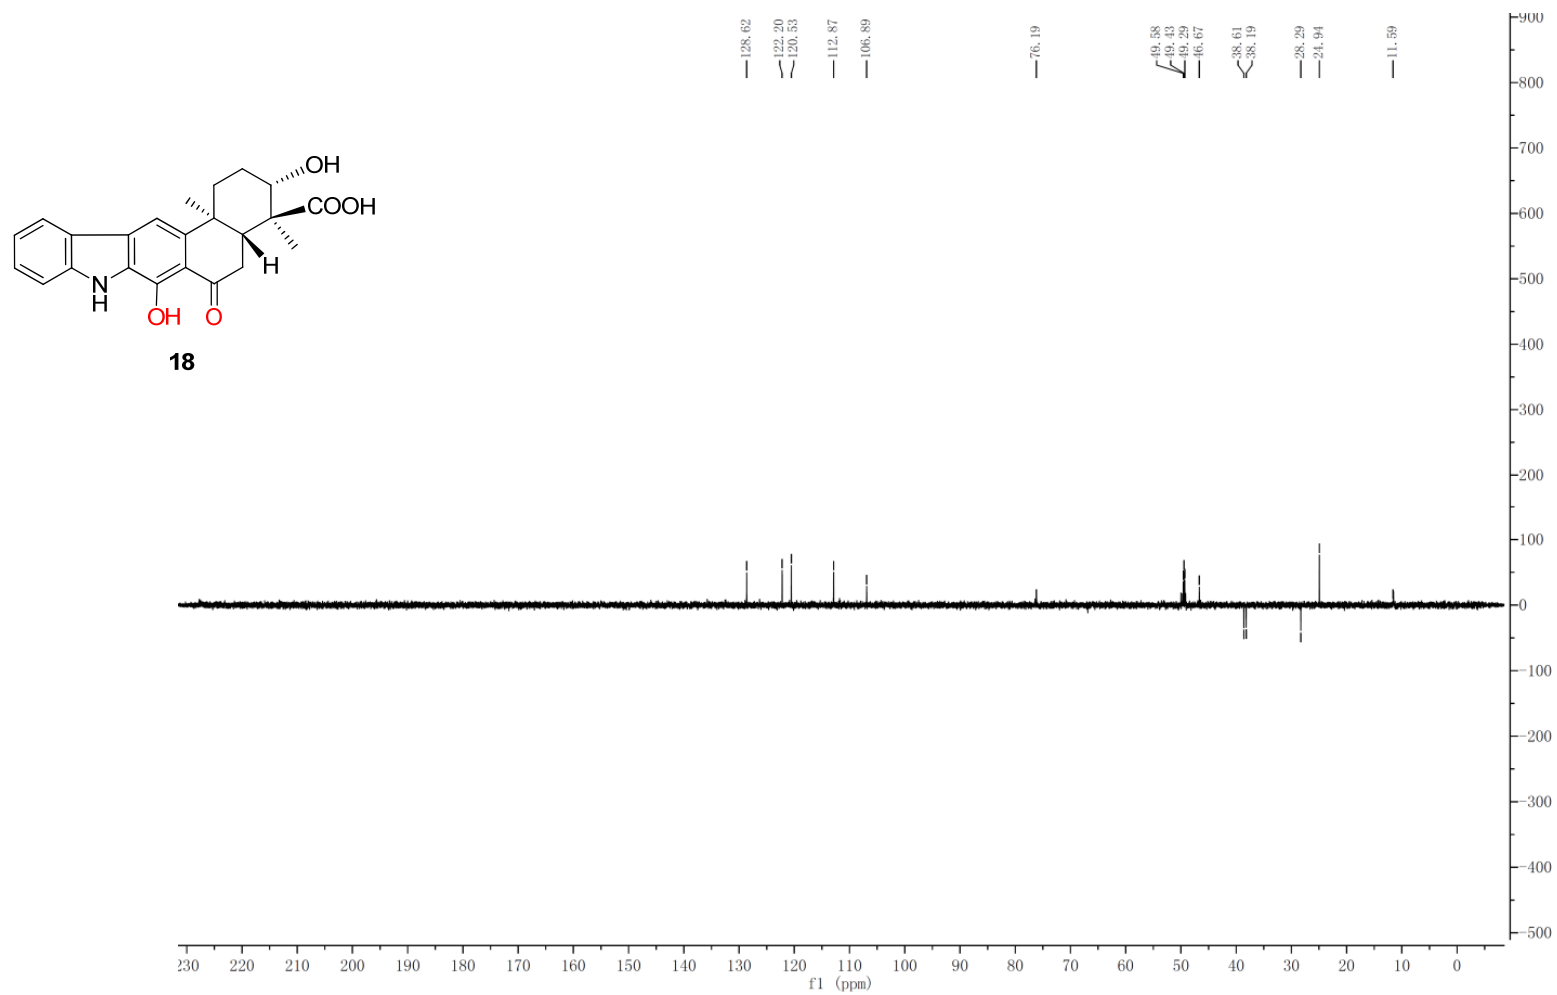

**Fig. S15** The spectral data of **18** ( 600 MHz for  $^1\text{H}$  NMR, 150 MHz for  $^{13}\text{C}$  NMR,  $\text{CD}_3\text{OD}$  )  
**(E)** The HSQC spectrum of **18**.

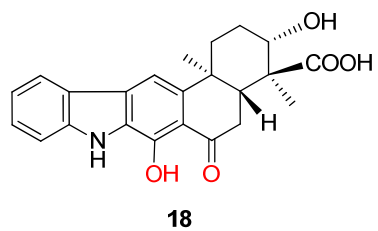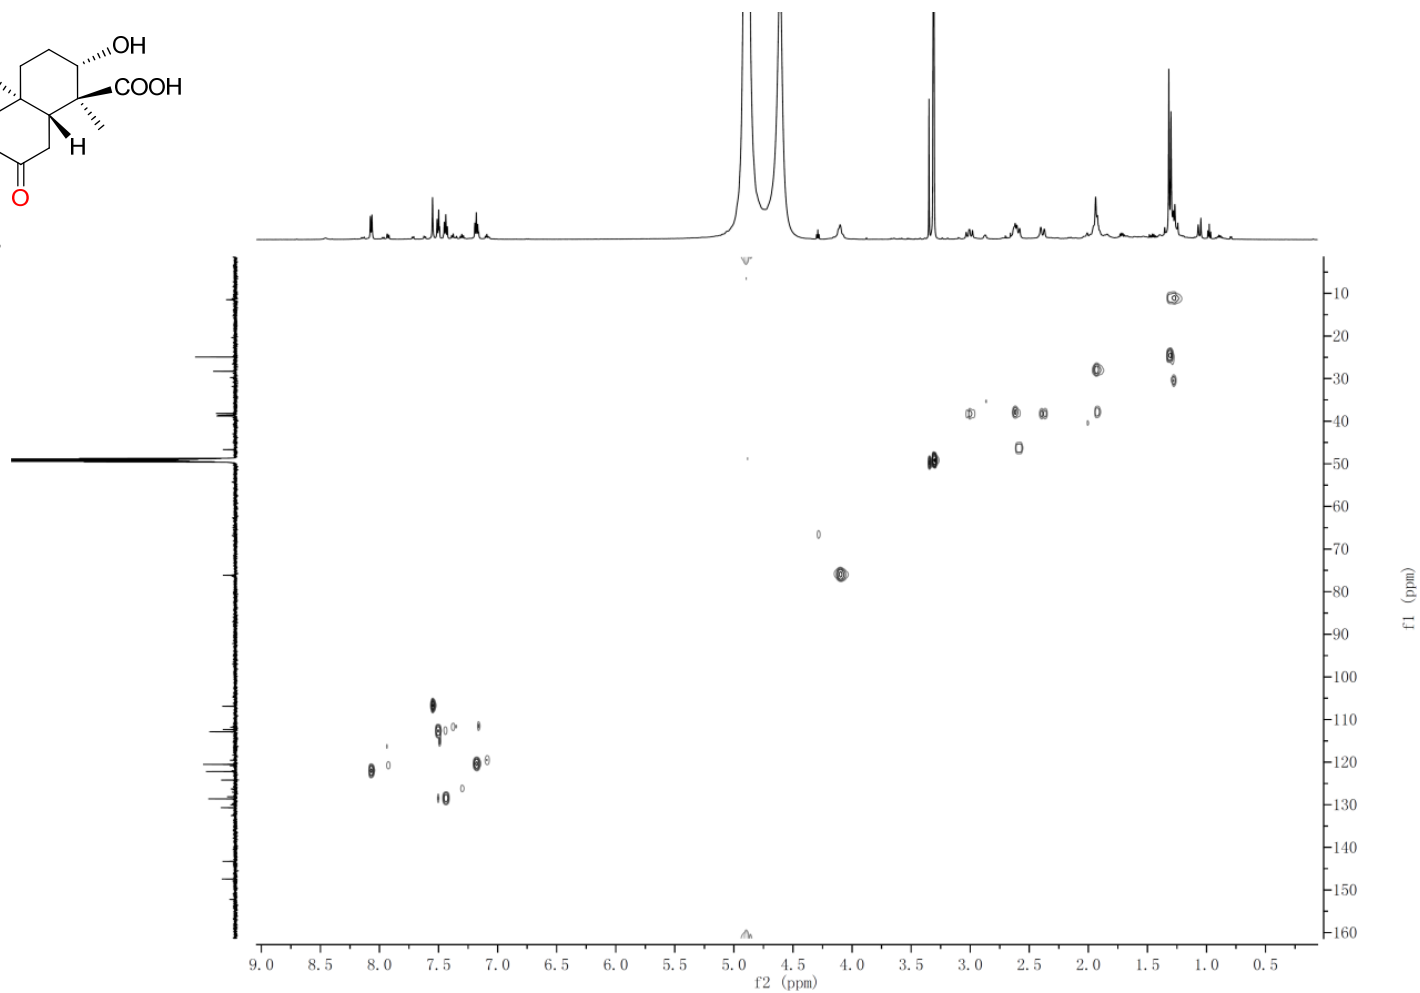



**Fig. S15** The spectral data of **18** ( 600 MHz for  $^1\text{H}$  NMR, 150 MHz for  $^{13}\text{C}$  NMR,  $\text{CD}_3\text{OD}$  )

(F) The  $^1\text{H}$ - $^1\text{H}$  COSY spectrum of **18**.

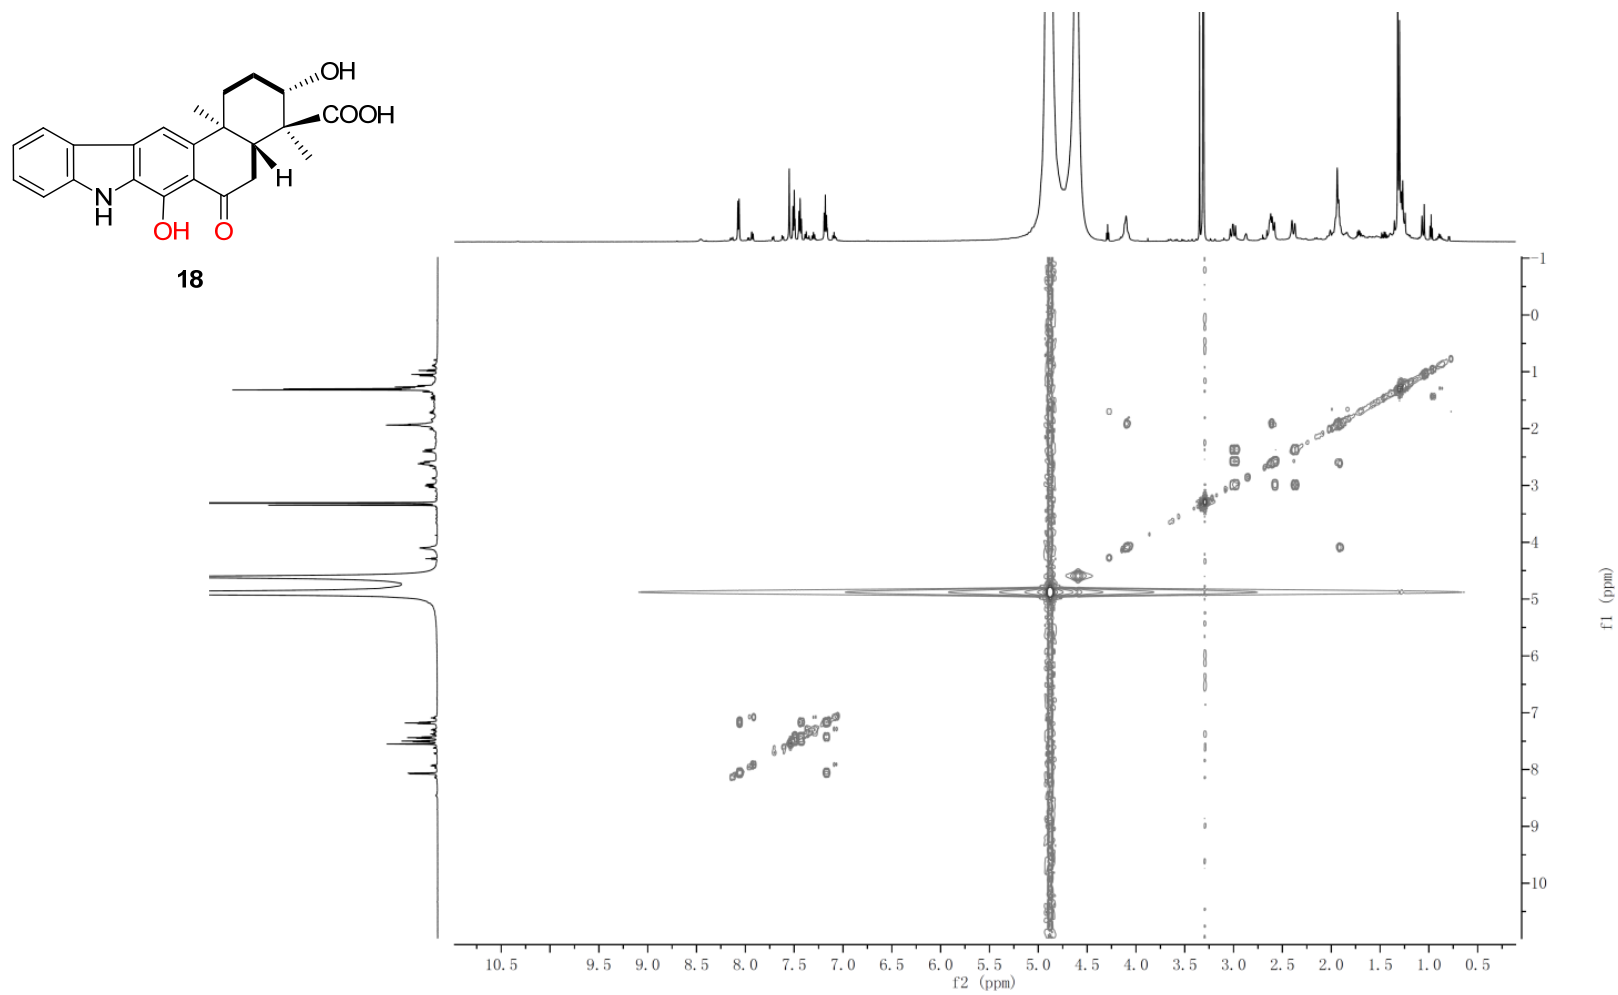

**Fig. S15** The spectral data of **18** ( 600 MHz for  $^1\text{H}$  NMR, 150 MHz for  $^{13}\text{C}$  NMR,  $\text{CD}_3\text{OD}$  )  
**(G)** The HMBC spectrum of **18**.

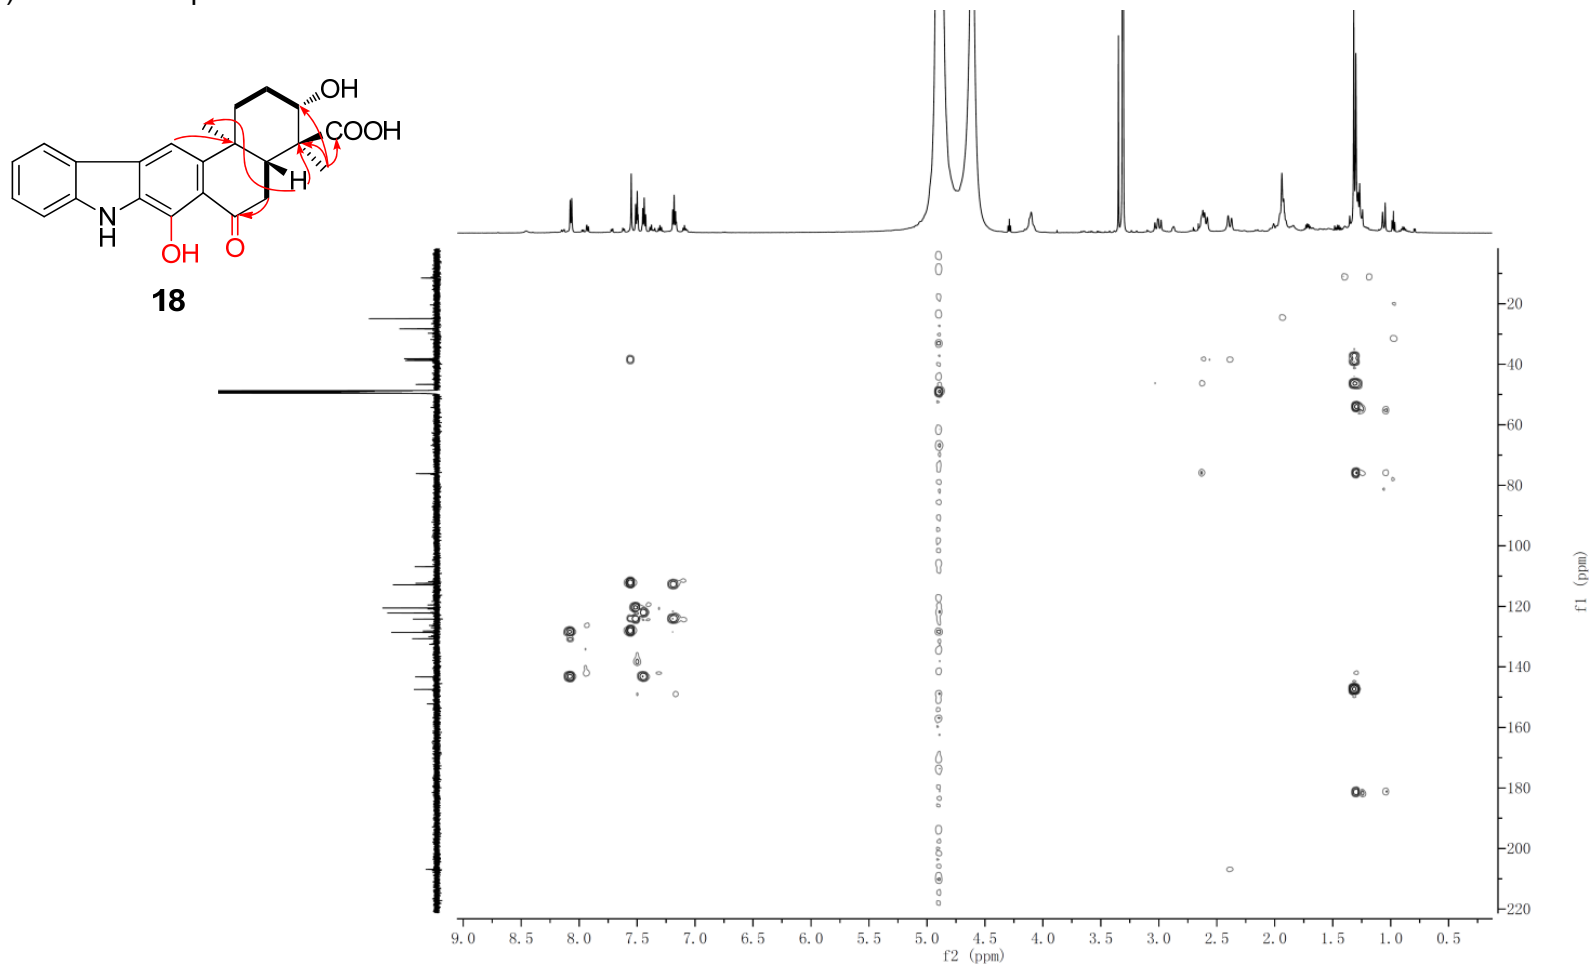

**Fig. S16** The spectral data of **19** ( 600 MHz for  $^1\text{H}$  NMR, 150 MHz for  $^{13}\text{C}$  NMR,  $\text{CD}_3\text{OD}$  )  
**(A)** The HRESIMS spectrum of **19**

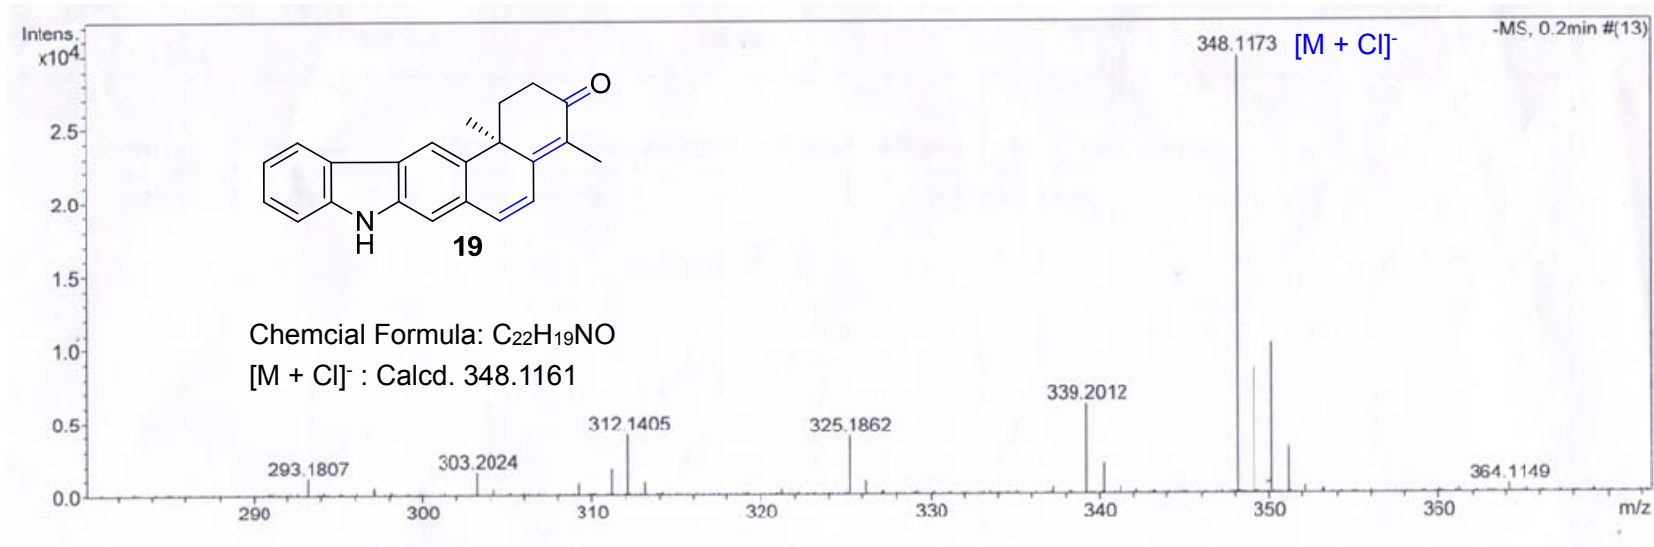

**Fig. S16** The spectral data of **19** ( 600 MHz for  $^1\text{H}$  NMR, 150 MHz for  $^{13}\text{C}$  NMR,  $\text{CD}_3\text{OD}$  )

**(B)** The  $^1\text{H}$ -NMR spectrum of **19**

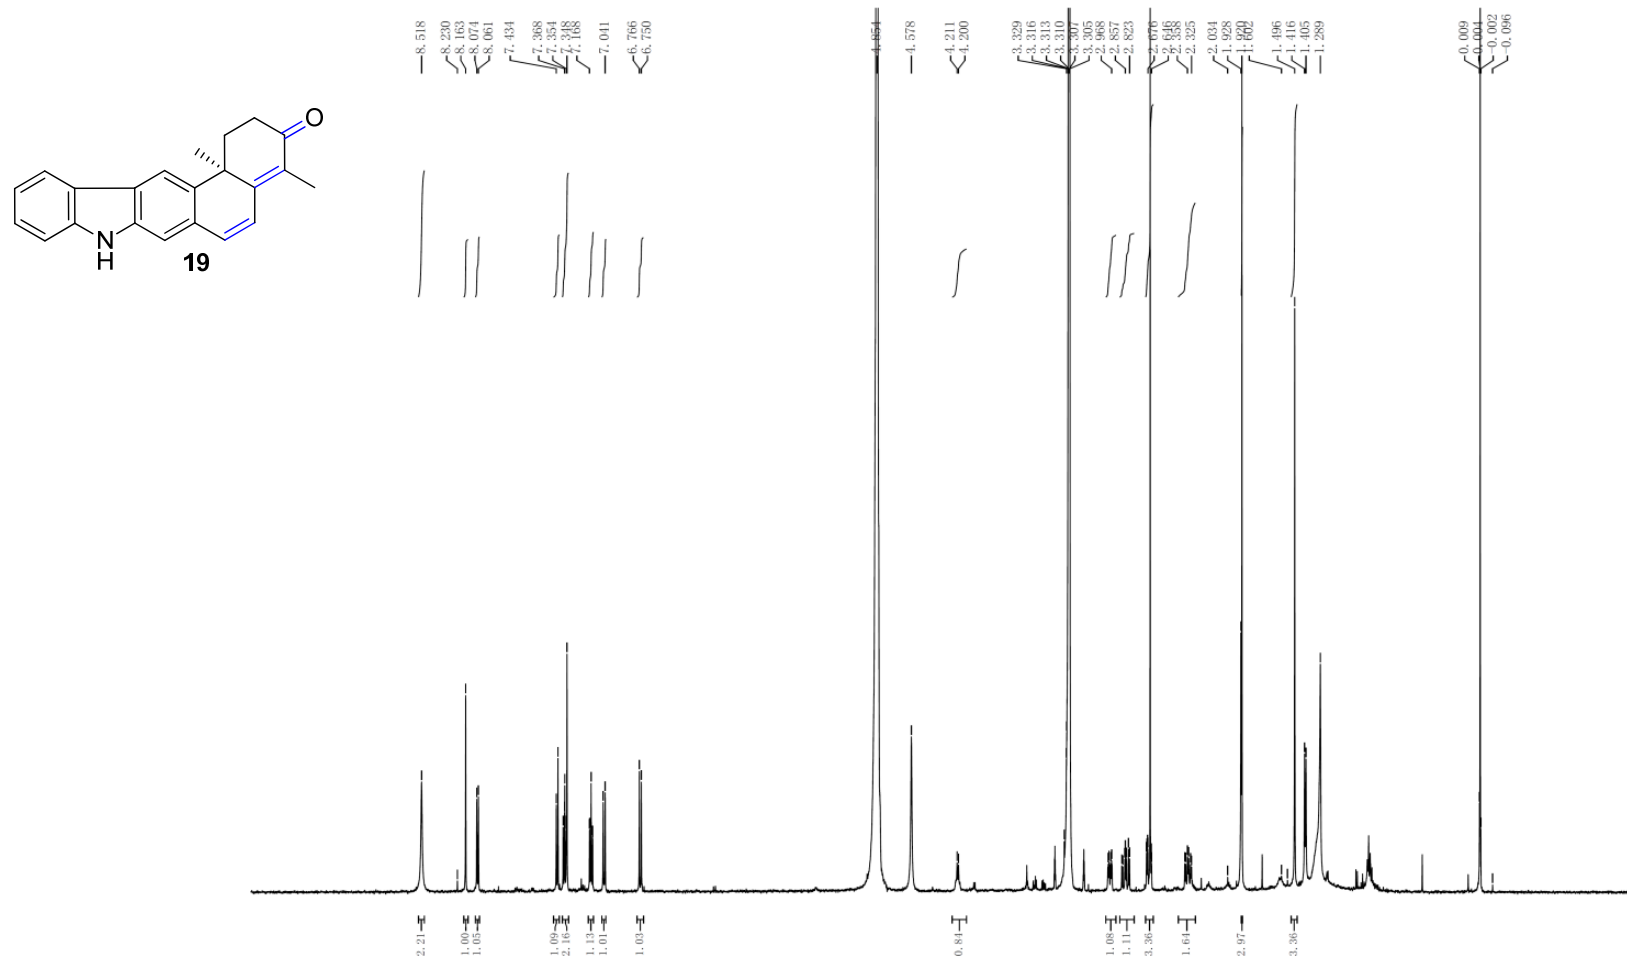

**Fig. S16** The spectral data of **19** ( 600 MHz for  $^1\text{H}$  NMR, 150 MHz for  $^{13}\text{C}$  NMR,  $\text{CD}_3\text{OD}$  )

**(C)** The  $^{13}\text{C}$ -NMR spectrum of **19**

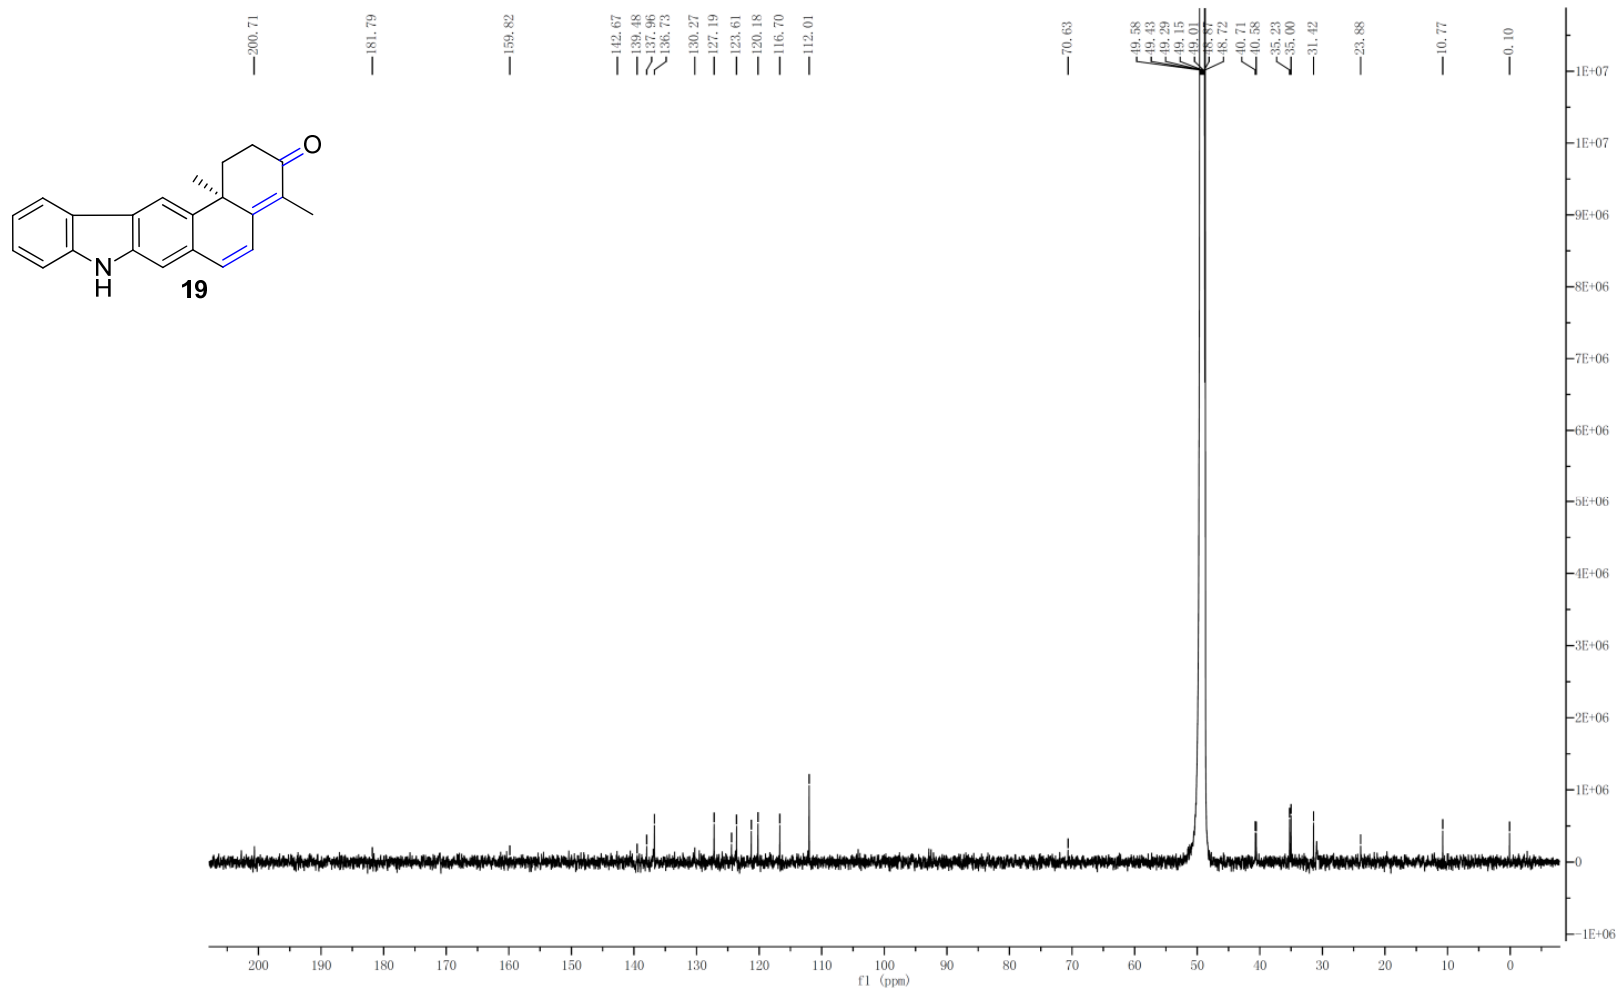

**Fig. S16** The spectral data of **19** ( 600 MHz for  $^1\text{H}$  NMR, 150 MHz for  $^{13}\text{C}$  NMR,  $\text{CD}_3\text{OD}$  )  
**(D)** The DEPT135 spectrum of **19**

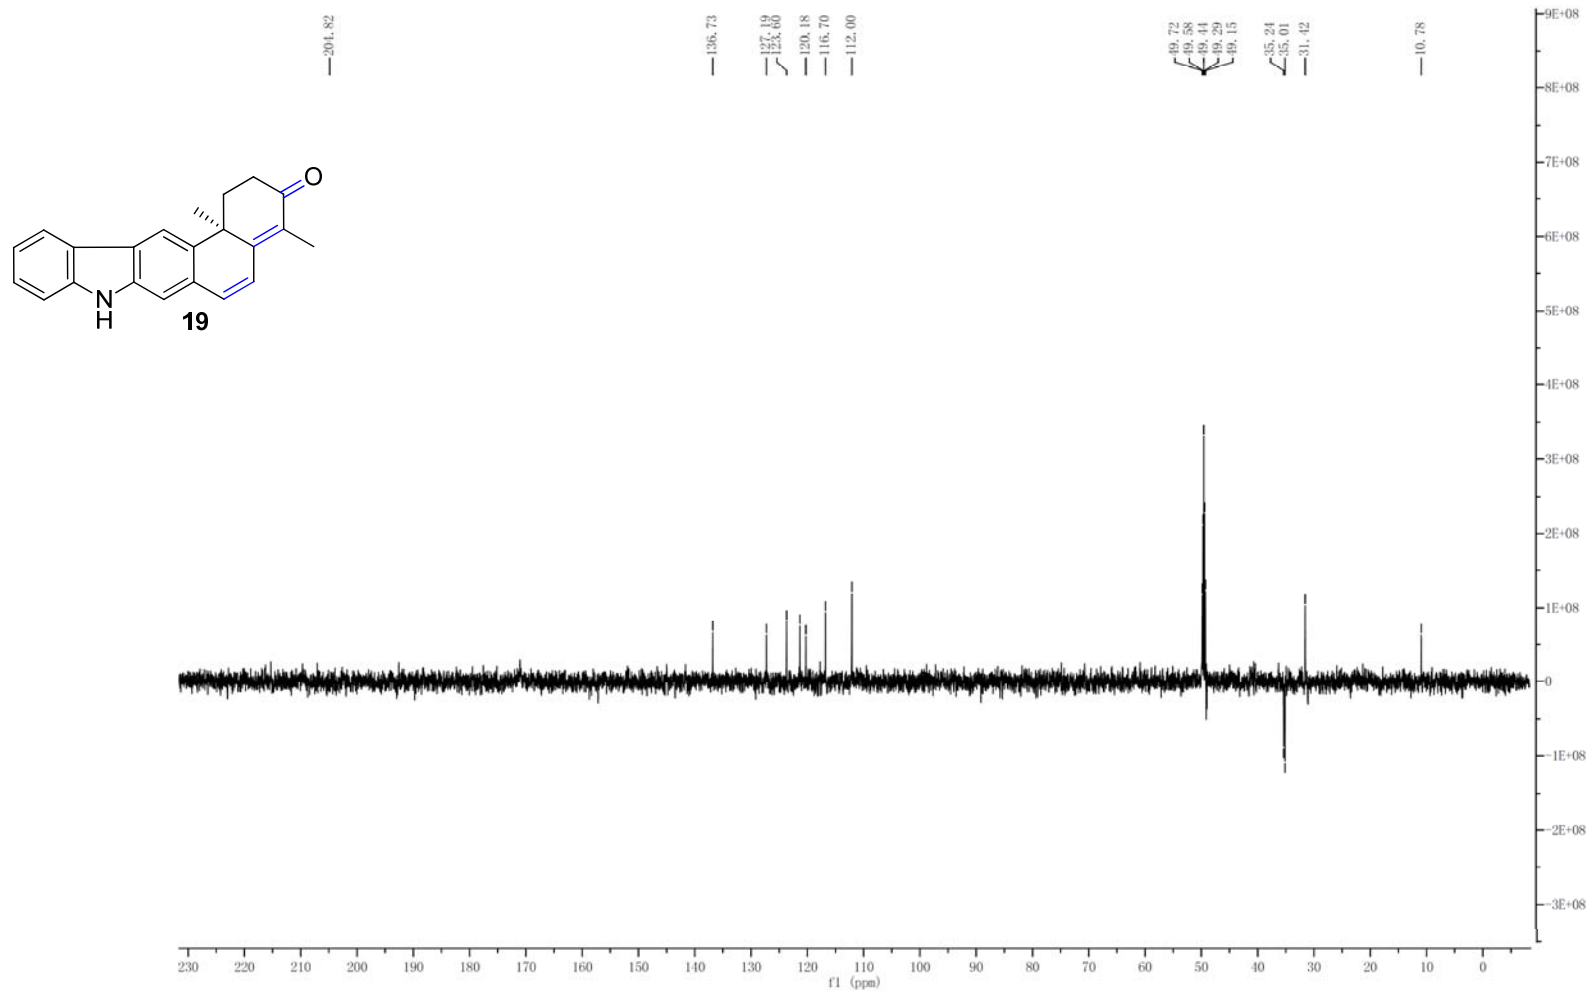

**Fig. S16** The spectral data of **19** ( 600 MHz for  $^1\text{H}$  NMR, 150 MHz for  $^{13}\text{C}$  NMR,  $\text{CD}_3\text{OD}$  )  
**(E)** The HSQC spectrum of **19**

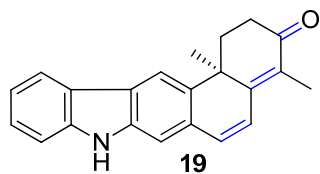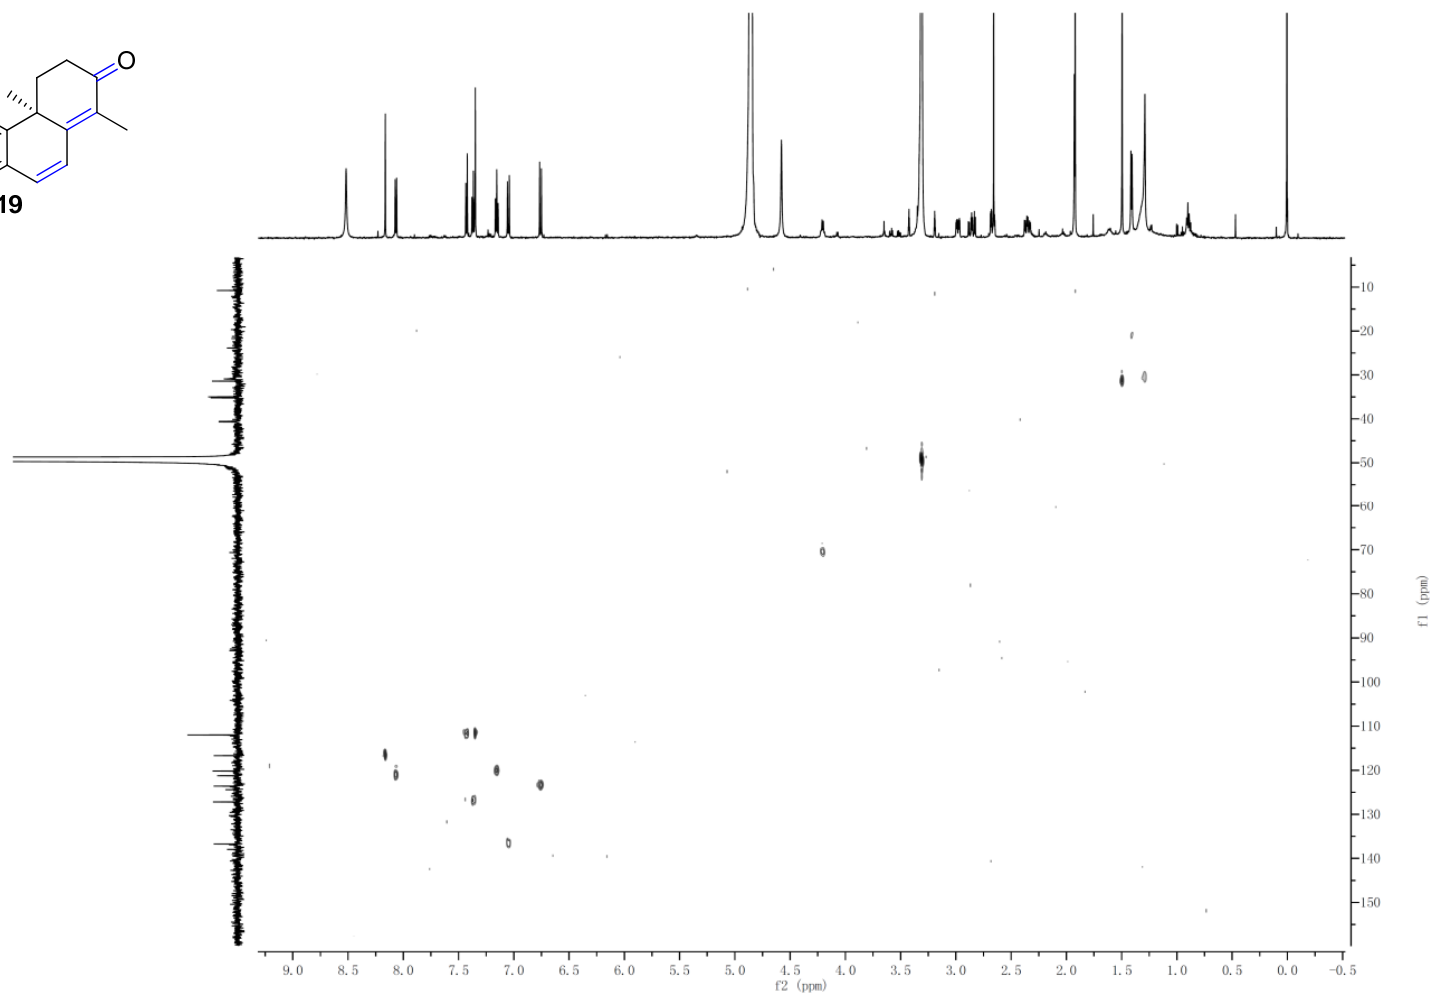

**Fig. S16** The spectral data of **19** ( 600 MHz for  $^1\text{H}$  NMR, 150 MHz for  $^{13}\text{C}$  NMR,  $\text{CD}_3\text{OD}$  )

**(F)** The HMQC spectrum of **19**

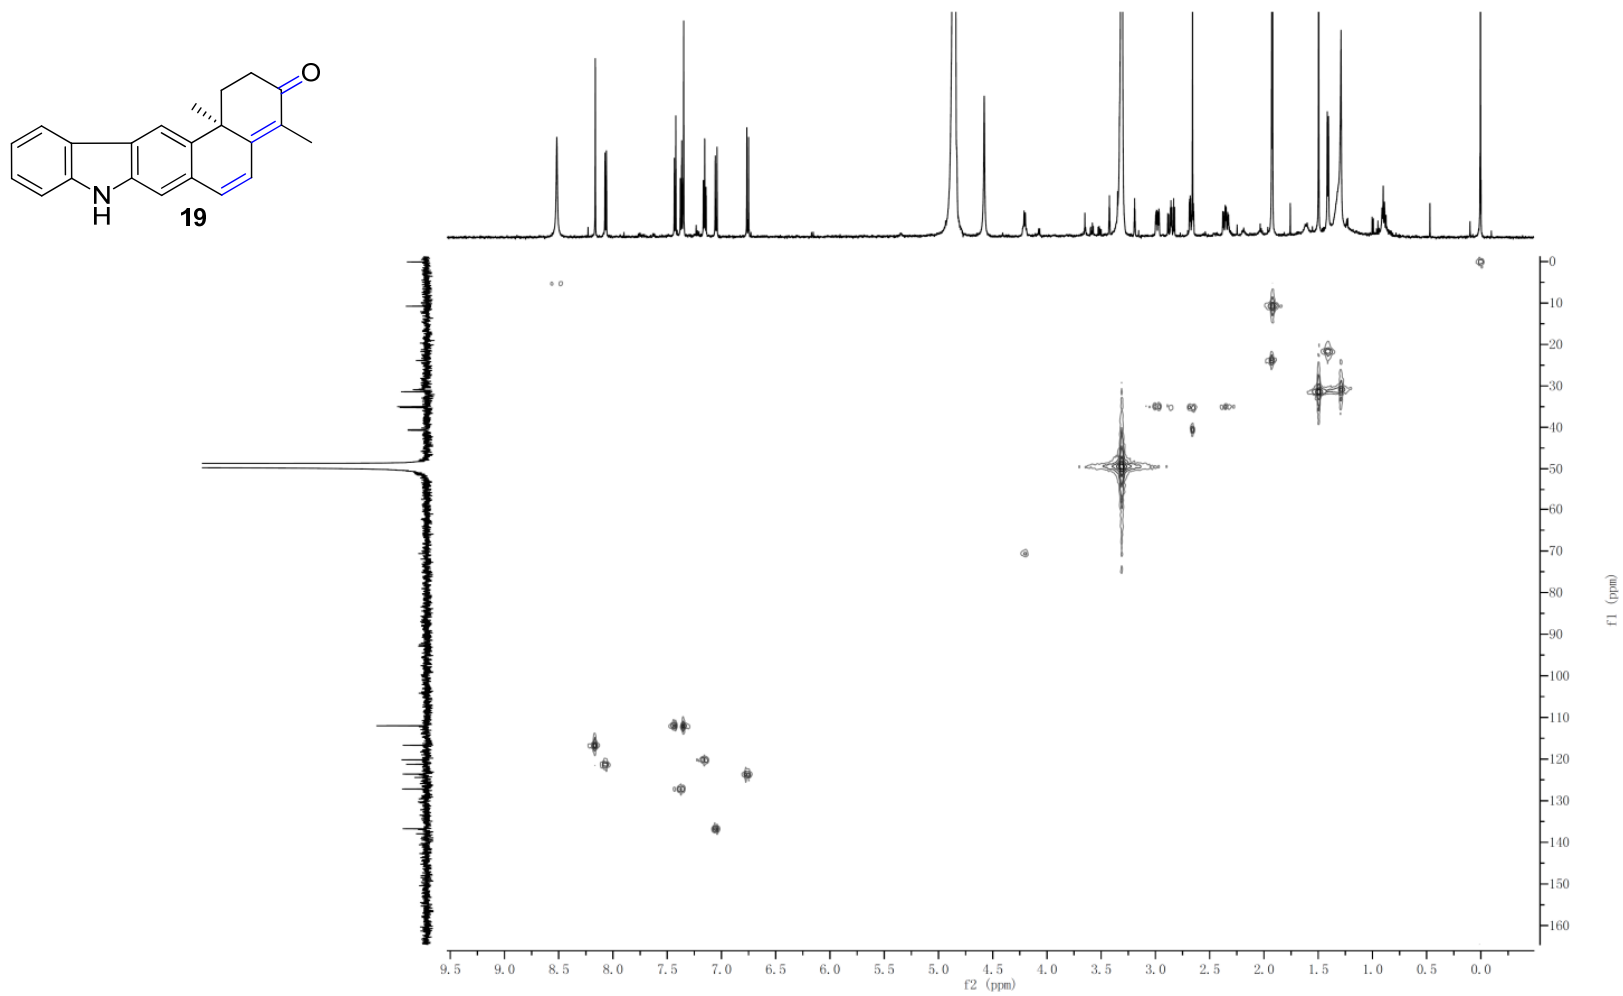



**Fig. S16** The spectral data of **19** ( 600 MHz for  $^1\text{H}$  NMR, 150 MHz for  $^{13}\text{C}$  NMR,  $\text{CD}_3\text{OD}$  )

**(G)** The  $^1\text{H}$ - $^1\text{H}$  COSY spectrum of **19**

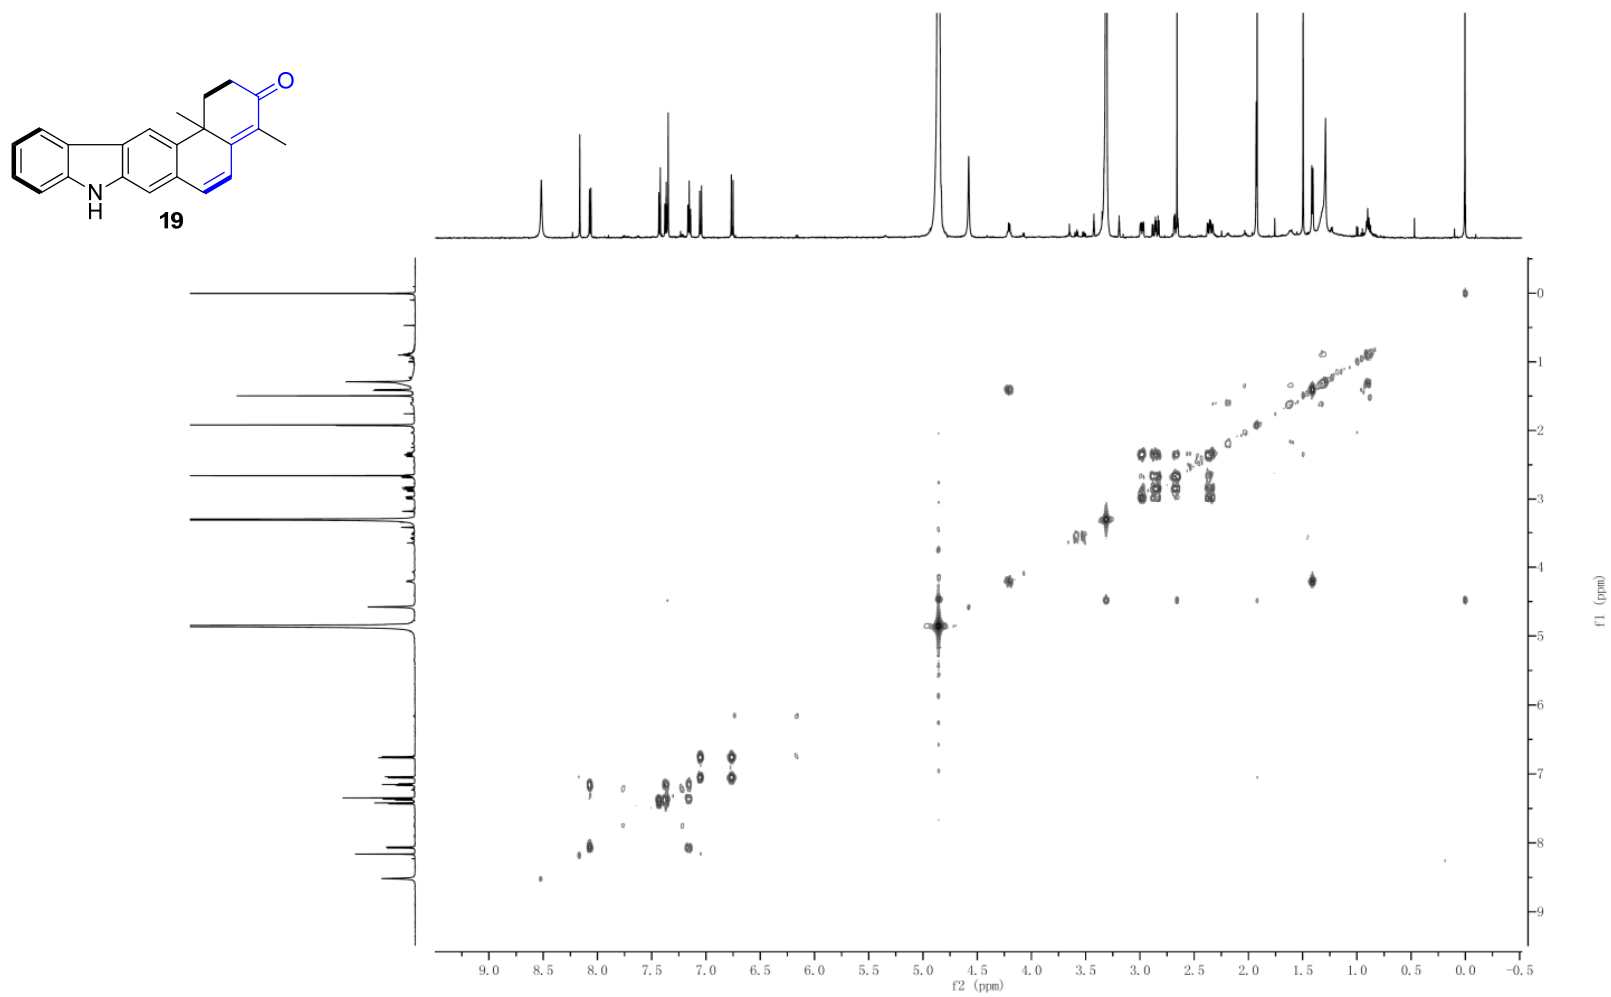

**Fig. S16** The spectral data of **19** ( 600 MHz for  $^1\text{H}$  NMR, 150 MHz for  $^{13}\text{C}$  NMR,  $\text{CD}_3\text{OD}$  )  
**(H)** The HMBC spectrum of **19**

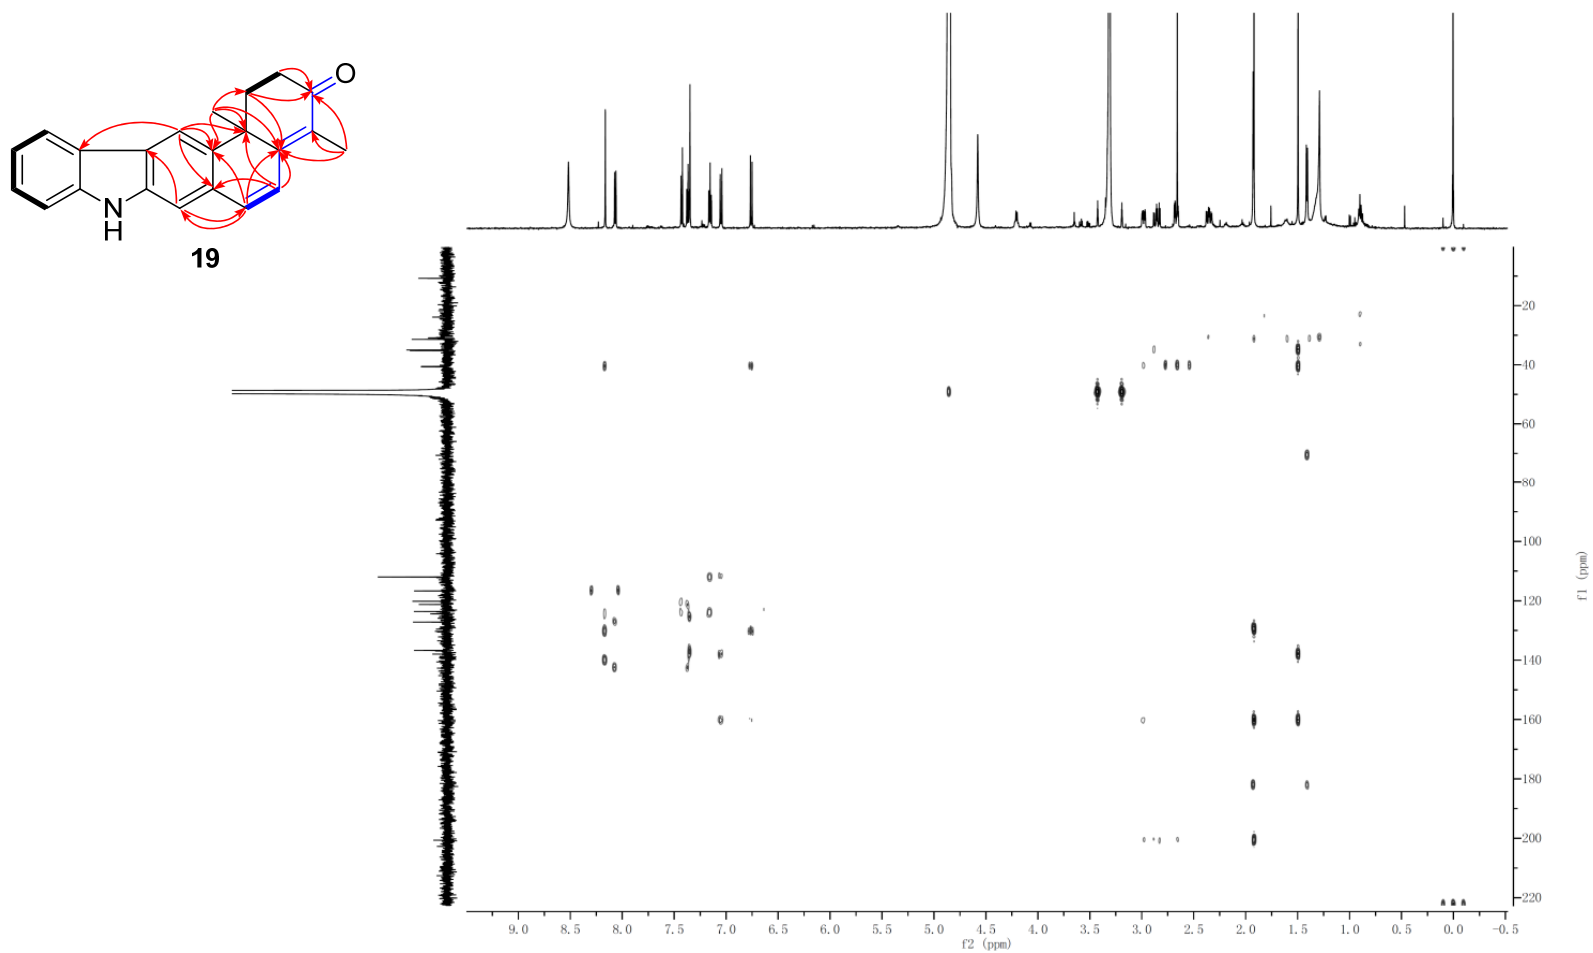

**Fig. S17** Stability of compounds **12** stored in organic solvents.

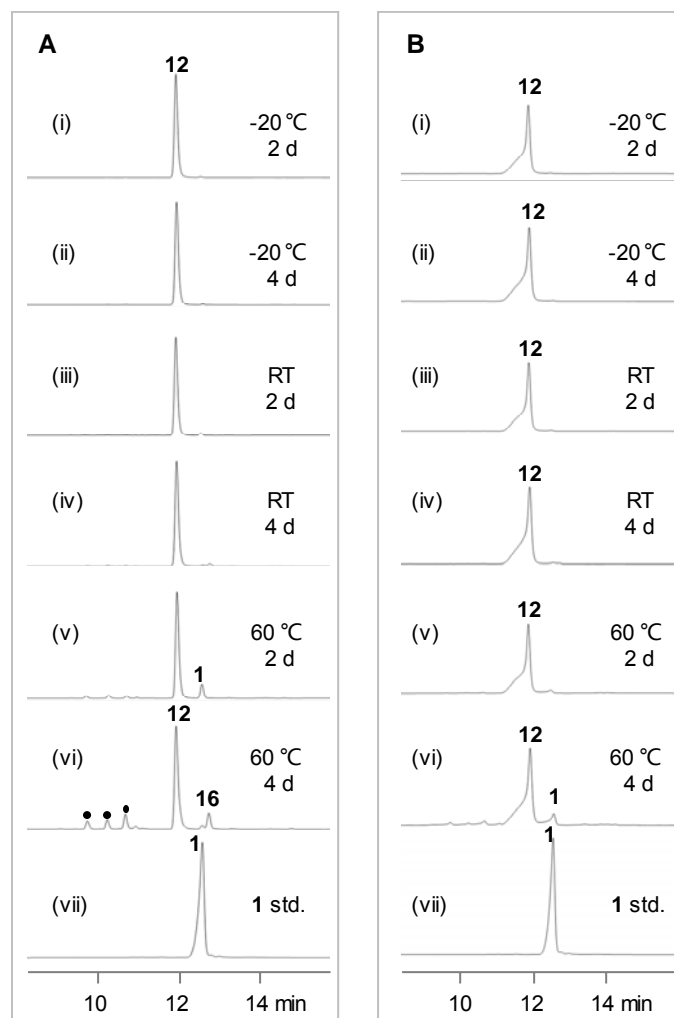

(A): **NOXM (12)** dissolved in H<sub>2</sub>O/AcN (1:1, v/v); (B): **12** dissolved in MeOH. (i) stored at -20 °C for 2 days; (ii) stored at -20 °C for 4 days; (iii) stored at room temperature for 2 days; (iv) stored at room temperature for 4 days; (v) incubated at 60 °C for 2 days; (vi) incubated at 60 °C for 4 days; (vii) XMA (**1**) standard; the filled black circles (●) denote multiple XMA-related products which have not been isolated for structure elucidation.

**Fig. S18** The hypothesized mechanism for the formation of DXMs A-C (**8-10**).

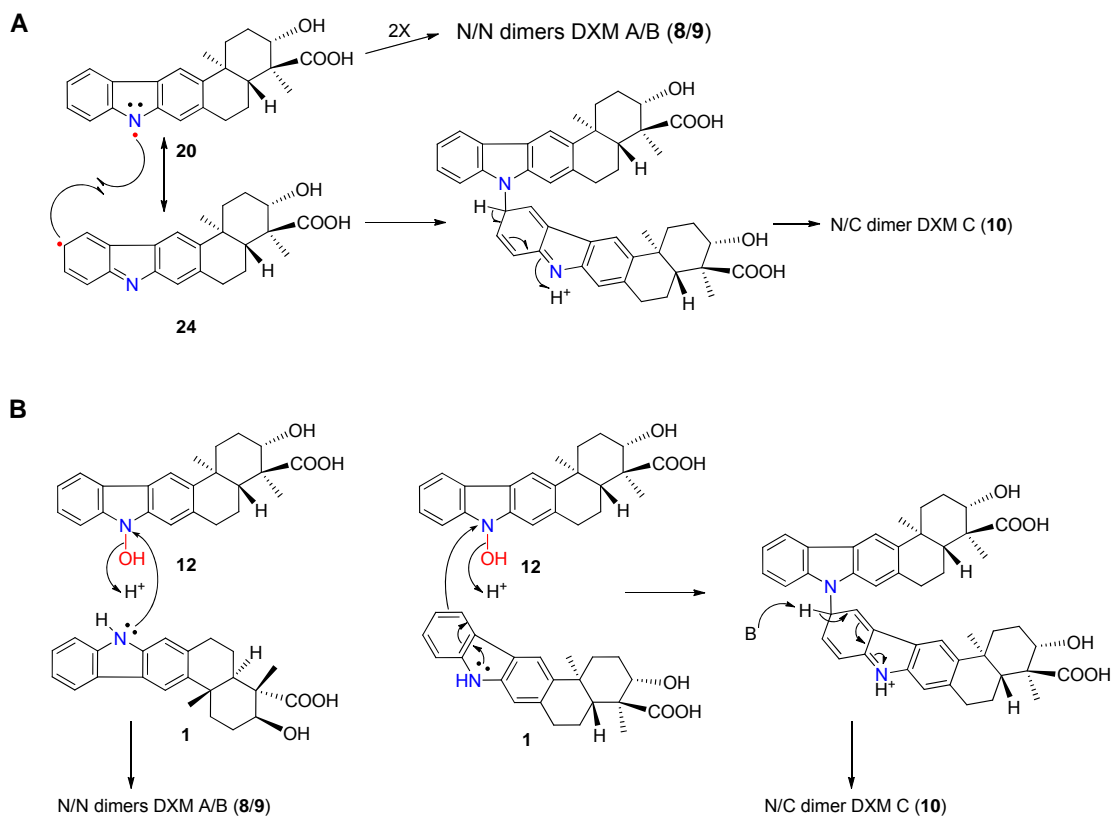

## Supplementary Reference

1. D. J. MacNeil, K. M. Gewain, C. L. Ruby, G. Dezeny, P. H. Gibbons and T. MacNeil, *Gene*, 1992, **111**, 61-68.
2. H. Zhou, Y. Wang, Y. Yu, T. Bai, L. Chen, P. Liu, H. Guo, C. Zhu, M. Tao and Z. Deng, *Curr. Microbiol.*, 2011.
3. H. Li, Q. Zhang, S. Li, Y. Zhu, G. Zhang, H. Zhang, X. Tian, S. Zhang, J. Ju and C. Zhang, *J. Am. Chem. Soc.*, 2012, **134**, 8996-9005.
4. K. A. Datsenko and B. L. Wanner, *Proc. Natl. Acad. Sci. U. S. A.*, 2000, **97**, 6640-6645.
5. M. S. B. Paget, L. Chamberlin, A. Atrih, S. J. Foster and M. J. Buttner, *J. Bacteriol.*, 1999, **181**, 204-211.
6. M. Bierman, R. Logan, K. O'Brien, E. T. Seno, R. N. Rao and B. E. Schoner, *Gene*, 1992, **116**, 43-49.
7. Y. Zhu, P. Fu, Q. Lin, G. Zhang, H. Zhang, S. Li, J. Ju, W. Zhu and C. Zhang, *Org. Lett.*, 2012, **14**, 2666-2669.
8. K. M. Meneely and A. L. Lamb, *Biochemistry*, 2007, **46**, 11930-11937.
9. J. A. Mayfield, R. E. Frederick, B. R. Streit, T. A. Wencewicz, D. P. Ballou and J. L. DuBois, *J. Biol. Chem.*, 2010, **285**, 30375-30388.
10. C. Binda, R. M. Robinson, J. S. Martin Del Campo, N. D. Keul, P. J. Rodriguez, H. H. Robinson, A. Mattevi and P. Sobrado, *J. Biol. Chem.*, 2015, **290**, 12676-12688.
11. Y. Sugai, Y. Katsuyama and Y. Ohnishi, *Nat. Chem. Biol.*, 2016, **12**, 73-75.
12. Z. D. Huang, K. K. A. Wang and W. A. van der Donk, *Chem. Sci.*, 2016, **7**, 5219-5223.
13. J. Lee and H. M. Zhao, *Angew. Chem., Int. Ed.*, 2006, **45**, 622-625.
14. H. D. Johnson and J. S. Thorson, *J. Am. Chem. Soc.*, 2008, **130**, 17662-17663.
15. Y. S. Choi, H. Zhang, J. S. Brunzelle, S. K. Nair and H. Zhao, *Proc. Natl. Acad. Sci. U. S. A.*, 2008, **105**, 6858-6863.
16. Y. Lindqvist, H. Koskiniemi, A. Jansson, T. Sandalova, R. Schnell, Z. L. Liu, P. Mantsala, J. Niemi and G. Schneider, *J. Mol. Biol.*, 2009, **393**, 966-977.
17. M. Kanteev, A. Bregman-Cohen, B. Deri, A. Shahar, N. Adir and A. Fishman, *Biochimica Et Biophysica Acta-Proteins and Proteomics*, 2015, **1854**, 1906-1913.
18. L. K. Liu, H. Abdelwahab, J. S. M. Del Campo, R. Mehra-Chaudhary, P. Sobrado and J. J. Tanner, *Journal of Biological Chemistry*, 2016, **291**, 21553-21562.
19. K. S. Ryan, A. R. Howard-Jones, M. J. Hamill, S. J. Elliott, C. T. Walsh and C. L. Drennan, *Proc. Natl. Acad. Sci. U. S. A.*, 2007, **104**, 15311-15316.
20. W. J. H. van Berkel, N. M. Kamerbeek and M. W. Fraaije, *J. Biotechnol.*, 2006, **124**, 670-689.
21. M. M. E. Huijbers, S. Montersino, A. H. Westphal, D. Tischler and W. J. H. van Berkel, *Arc. Biochem. Biophys.*, 2014, **544**, 2-17.
22. K. Crozier-Reabe and G. R. Moran, *Int. J. Mol. Sci.*, 2012, **13**, 15601-15639.
